# Supplementary material for: Organocatalytic asymmetric [3+2] cycloaddition of N-2,2,2-trifluoroethylisatin ketimines with 3-alkenyl-5-arylfuran-2(3H)-ones
Source: Royal Society of Chemistry journal article supplement (doi:10.1039/c6cc06367e), 2016-01-01
Supplement: c6cc06367e1.pdf [file c6cc06367e1.pdf]

**Organocatalytic Asymmetric [3+2] Cycloaddition of *N*-2,2,2-Trifluoroethylsatin  
Ketimines with 3-Alkenyl-5-arylfuran-2(3*H*)-ones: Efficient Synthesis of  
Spiro[pyrrolidin-3,2'-oxindoles] Bearing Four Consecutive Stereocenters with Two  
Vicinal Spiro-quaternary Chiral Centers**

Zhen-Hua Wang,<sup>a,c</sup> Zhi-Jun Wu,<sup>b</sup> Deng-Feng Yue,<sup>a,c</sup> Wen-Fei Hu,<sup>a,c</sup> Xiao-Mei Zhang,<sup>a</sup>  
Xiao-Ying Xu<sup>\*:a</sup> and Wei-Cheng Yuan<sup>\*:a</sup>

<sup>a</sup>National Engineering Research Center of Chiral Drugs, Chengdu Institute of Organic  
Chemistry, Chinese Academy of Sciences, Chengdu 610041, China

<sup>b</sup>Chengdu Institute of Biology, Chinese Academy of Sciences, Chengdu 610041, China

<sup>c</sup>University of Chinese Academy of Sciences, Beijing 100049, China

[xuxy@cioc.ac.cn](mailto:xuxy@cioc.ac.cn); [yuanwc@cioc.ac.cn](mailto:yuanwc@cioc.ac.cn)

**Supporting Information**

**Table of Contents**

|                                                                                                                   |     |
|-------------------------------------------------------------------------------------------------------------------|-----|
| 1. General experimental information.....                                                                          | S1  |
| 2. General procedure for the synthesis starting materials.....                                                    | S1  |
| 3. General experimental procedure for asymmetric synthesis of compounds <b>3</b> .....                            | S1  |
| 4. Experimental procedure for synthesis of compounds <b>4</b> and <b>6</b> .....                                  | S7  |
| 5. X-ray crystal structure of compound <b>3q</b> .....                                                            | S10 |
| 6. <sup>1</sup> H, <sup>13</sup> C NMR and HPLC spectra for compounds <b>3a-z</b> and compounds <b>4, 6</b> ..... | S11 |

## 1. General experimental information

Reagents were purchased from commercial sources and were used as received unless mentioned otherwise. Reactions were monitored by TLC.  $^1\text{H}$  NMR and  $^{13}\text{C}$  NMR spectra were recorded in  $\text{CDCl}_3$  and  $\text{DMSO-}d_6$ .  $^1\text{H}$  NMR chemical shifts are reported in ppm relative to tetramethylsilane (TMS) with the solvent resonance employed as the internal standard ( $\text{CDCl}_3$  at 7.26 ppm,  $\text{DMSO-}d_6$  at 2.50 ppm). Data are reported as follows: chemical shift, multiplicity (s = singlet, br s = broad singlet, d = doublet, t = triplet, q = quartet, m = multiplet), coupling constants (Hz) and integration.  $^{13}\text{C}$  NMR chemical shifts are reported in ppm from tetramethylsilane (TMS) with the solvent resonance as the internal standard ( $\text{CDCl}_3$  at 77.20 ppm,  $\text{DMSO-}d_6$  at 39.51 ppm). Melting points were recorded on a melting point apparatus.

## 2. General procedure for the synthesis of starting materials.

**1a-1p** were prepared according to the literature.<sup>1,2</sup> **2a-2k** were prepared according to literature reported by Wang and co-workers and slightly modified.<sup>3</sup>

## 3. General procedure for the synthesis of compounds 3a-z.

In an ordinary vial equipped with a magnetic stirring bar, the compounds **1** (0.20 mmol, 2.0 equiv), compounds **2** (0.10 mmol, 1.0 equiv) and catalyst **C** (1~5 mol %) were dissolved in DCE (1 mL), and then the mixture was stirred at room temperature for the indicated time. After completion of the reaction as indicated by TLC, the products **3** were isolated by flash chromatography on silica gel (petroleum ether/acetone = 10/1~2/1).

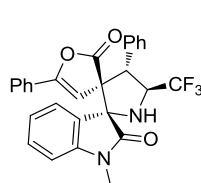

Compound **3a**: White solid; 47.8 mg, 98% yield; >20:1 dr, 97% ee;  $[\alpha]_{\text{D}}^{20} = -195.6$  (c. 0.960, acetone); m.p. 199.8-200.7 °C; HPLC (AD-H, *i*-propanol/*n*-hexane = 15/85, flow rate = 1.0 mL/min,  $\lambda = 254$  nm)  $t_{\text{R}} = 22.1$  min (minor), 30.4 min (major);  $^1\text{H}$  NMR (300 MHz,  $\text{DMSO-}d_6$ )  $\delta$  3.10 (s, 3H), 4.52 (d,  $J = 8.6$  Hz, 1H), 4.77-4.97 (m, 1H), 5.17 (d,  $J = 10.8$  Hz, 1H), 6.84-7.02 (m, 3H), 7.15-7.34 (m, 6H), 7.34-7.42 (m, 5H), 7.51 (d,  $J = 7.5$  Hz, 1H);  $^{13}\text{C}$  NMR (75 MHz,  $\text{DMSO-}d_6$ )  $\delta$  25.9, 50.7, 60.6 (q,  $J = 29.7$  Hz, 1C), 67.5, 72.1, 102.9, 108.4, 121.4, 124.3, 124.4, 126.1 (q,  $J = 278.2$  Hz, 1C), 126.3, 126.9, 128.1, 128.3, 128.6, 129.0, 130.1, 130.3, 133.4, 143.6, 150.9, 172.7, 174.5; HRMS (ESI-TOF) calcd. for  $\text{C}_{28}\text{H}_{21}\text{F}_3\text{N}_2\text{NaO}_3$   $[\text{M} + \text{Na}]^+$  513.1396, found: 513.1397.

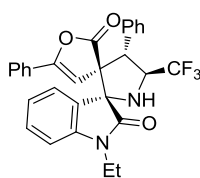

Compound **3b**: White solid; 49.9 mg, 99% yield; >20:1 dr, 95% ee;  $[\alpha]_{\text{D}}^{20} = -183.9$  (c. 0.543, acetone); m.p. 211.7-212.5 °C; HPLC (IA-H, DCM/*i*-propanol/*n*-hexane = 5/5/90, flow rate = 1.0 mL/min,  $\lambda = 254$  nm)  $t_{\text{R}} = 18.2$  min (minor), 38.4 min (major);  $^1\text{H}$  NMR (300 MHz,  $\text{DMSO-}d_6$ )  $\delta$  1.12 (t,  $J = 7.0$  Hz, 3H), 3.53-3.60 (m, 1H), 3.74-3.81 (m, 1H), 4.49 (d,  $J = 8.6$  Hz, 1H), 4.85-4.92 (m, 1H), 5.17 (d,  $J = 10.8$  Hz, 1H), 6.89-6.98 (m, 3H), 7.18-7.32 (m, 6H), 7.36 (s, 5H), 7.53 (d,  $J = 7.5$  Hz, 1H);  $^{13}\text{C}$  NMR (75 MHz,  $\text{DMSO-}d_6$ )  $\delta$  12.2, 33.9, 50.7, 60.6 (q,  $J = 29.7$  Hz, 1C), 67.5, 71.8, 102.8, 108.3, 121.1, 124.4, 124.5, 126.1 (q,  $J = 278.3$  Hz, 1C), 126.4, 126.9, 128.0, 128.3, 128.6, 128.9, 130.0, 130.3, 133.4, 142.6, 150.9; HRMS (ESI-TOF) calcd. for  $\text{C}_{29}\text{H}_{23}\text{F}_3\text{N}_2\text{NaO}_3$   $[\text{M} + \text{Na}]^+$  527.1553, found: 527.1530.

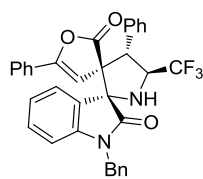

Compound **3c**: White solid; 59.1 mg, 99% yield; >20:1 dr, 97% ee;  $[\alpha]_{\text{D}}^{20} = -171.8$  (c. 0.554, acetone); m.p. 220.2-220.8 °C; HPLC (IA-H, DCM/*i*-propanol/*n*-hexane = 5/5/90, flow rate = 1.0 mL/min,  $\lambda = 254$  nm)  $t_{\text{R}} = 25.1$  min (minor), 40.4 min (major);  $^1\text{H NMR}$  (300 MHz, DMSO- $d_6$ )  $\delta$  4.62 (d,  $J = 8.6$  Hz, 1H), 4.73 (d,  $J = 15.7$  Hz, 1H), 4.84-5.00 (m, 1H), 5.04 (d,  $J = 15.7$  Hz, 1H), 5.26 (d,  $J = 10.8$  Hz, 1H), 6.76 (d,  $J = 7.8$  Hz, 1H), 6.91 (t,  $J = 7.6$  Hz, 1H), 7.03 (s, 1H), 7.10-7.23 (m, 2H), 7.24-7.43 (m, 14H), 7.56 (d,  $J = 7.5$  Hz, 1H);  $^{13}\text{C NMR}$  (75 MHz, DMSO- $d_6$ )  $\delta$  43.0, 51.0, 60.6 (q,  $J = 29.3$  Hz, 1C), 67.5, 72.0, 102.9, 109.1, 121.6, 124.5, 126.2 (q,  $J = 279.0$  Hz, 1C), 126.7, 126.9, 127.5, 127.5, 128.1, 128.4, 128.6, 128.7, 129.0, 130.1, 130.2, 133.4, 136.1, 142.8, 151.0, 172.8, 174.7; HRMS (ESI-TOF) calcd. for  $\text{C}_{34}\text{H}_{25}\text{F}_3\text{N}_2\text{NaO}_3$   $[\text{M} + \text{Na}]^+$  589.1709, found: 589.1713.

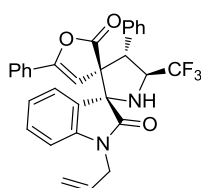

Compound **3d**: White solid; 56.9 mg, 99% yield; >20:1 dr, 96% ee;  $[\alpha]_{\text{D}}^{20} = -114.3$  (c. 0.589, acetone); m.p. 193.2-194.1 °C; HPLC (IA-H, *i*-propanol/*n*-hexane = 10/90, flow rate = 1.0 mL/min,  $\lambda = 254$  nm)  $t_{\text{R}} = 18.0$  min (minor), 35.0 min (major);  $^1\text{H NMR}$  (300 MHz, DMSO- $d_6$ )  $\delta$  4.16 (dd,  $J = 16.3, 5.7$  Hz, 1H), 4.41 (dd,  $J = 16.2, 4.7$  Hz, 1H), 4.56 (d,  $J = 8.5$  Hz, 1H), 4.79-5.01 (m, 1H), 5.09-5.30 (m, 3H), 5.66-5.89 (m, 1H), 6.86 (d,  $J = 7.8$  Hz, 1H), 6.93 (t,  $J = 7.6$  Hz, 1H), 6.99 (s, 1H), 7.13-7.43 (m, 11H), 7.54 (d,  $J = 7.4$  Hz, 1H);  $^{13}\text{C NMR}$  (75 MHz, DMSO- $d_6$ )  $\delta$  41.6, 50.8, 60.6 (q,  $J = 30.0$  Hz, 1C), 67.6, 72.0, 102.9, 109.0, 117.5, 121.4, 124.4, 124.5, 126.1 (q,  $J = 278.2$  Hz, 1C), 126.5, 126.9, 128.1, 128.4, 128.7, 129.0, 130.1, 130.2, 131.7, 133.4, 142.8, 151.0, 172.7, 174.3; HRMS (ESI-TOF) calcd. for  $\text{C}_{30}\text{H}_{23}\text{F}_3\text{N}_2\text{NaO}_3$   $[\text{M} + \text{Na}]^+$  539.1553, found: 539.1557.

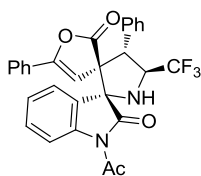

Compound **3e**: White solid; 50.9 mg, 98% yield; 12:1 dr, 98% ee;  $[\alpha]_{\text{D}}^{20} = -227.9$  (c. 0.523, acetone); m.p. 171.2-171.5 °C; HPLC (IA-H, DCM/*i*-propanol/*n*-hexane = 5/5/90, flow rate = 1.0 mL/min,  $\lambda = 254$  nm)  $t_{\text{R}} = 18.1$  min (minor), 19.2 min (major);  $^1\text{H NMR}$  (300 MHz, DMSO- $d_6$ )  $\delta$  2.66 (s, 3H), 4.77 (d,  $J = 7.4$  Hz, 1H), 4.85 (d,  $J = 10.8$  Hz, 1H), 4.90-5.06 (m, 1H), 6.98 (s, 1H), 7.12-7.23 (m, 2H), 7.23-7.40 (m, 10H), 7.69 (d,  $J = 7.6$  Hz, 1H), 8.03 (d,  $J = 8.1$  Hz, 1H);  $^{13}\text{C NMR}$  (75 MHz, DMSO- $d_6$ )  $\delta$  26.0, 51.2, 60.8 (q,  $J = 29.3$  Hz, 1C), 68.5, 72.4, 102.3, 115.4, 124.3, 124.3, 124.5, 126.0 (q,  $J = 278.3$  Hz, 1C), 126.5, 126.6, 128.3, 128.4, 128.7, 129.0, 130.3, 130.5, 132.7, 139.2, 151.4, 170.1, 173.4, 176.4; HRMS (ESI-TOF) calcd. for  $\text{C}_{29}\text{H}_{21}\text{F}_3\text{N}_2\text{NaO}_4$   $[\text{M} + \text{Na}]^+$  541.1346, found: 541.1351.

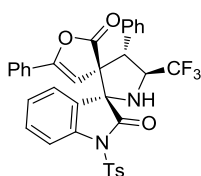

Compound **3f**: White solid; 57.4 mg, 91% yield; >20:1 dr, 88% ee;  $[\alpha]_{\text{D}}^{20} = -45.6$  (c. 1.435, acetone); m.p. 222.4-223.2 °C; HPLC (IA-H, *i*-propanol/*n*-hexane = 10/90, flow rate = 1.0 mL/min,  $\lambda = 254$  nm)  $t_{\text{R}} = 31.0$  min (minor), 36.1 min (major);  $^1\text{H NMR}$  (300 MHz, DMSO- $d_6$ )  $\delta$  2.38 (s, 3H), 4.68 (d,  $J = 7.3$  Hz, 1H), 4.74 (d,  $J = 10.8$  Hz, 1H), 4.83-4.99 (m, 1H), 6.93 (s, 1H), 7.09-7.22 (m, 2H), 7.22-7.40 (m, 10H), 7.49 (d,  $J = 8.3$  Hz, 2H), 7.64 (d,  $J = 7.4$  Hz, 1H), 7.71 (d,  $J = 8.2$  Hz, 1H), 7.98 (d,  $J = 8.3$  Hz, 2H);  $^{13}\text{C NMR}$  (75 MHz, DMSO- $d_6$ )  $\delta$  21.1, 51.1, 60.5 (q,  $J = 30.0$  Hz, 1C), 67.9, 72.2, 102.0, 112.5, 124.0, 124.5, 125.8 (q,  $J = 279.0$  Hz, 1C), 126.6, 127.4, 127.5, 128.2, 128.3, 128.6, 128.9, 130.2, 130.2, 130.9, 132.5, 134.3, 137.8, 146.0, 151.5, 172.5, 173.5; HRMS (ESI-TOF) calcd. for  $\text{C}_{34}\text{H}_{25}\text{F}_3\text{N}_2\text{NaO}_5\text{S}$   $[\text{M} + \text{Na}]^+$  653.1328, found: 653.1336.

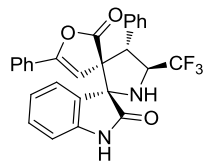

Compound **3g**: White solid; 43.5 mg, 91% yield; >20:1 dr, 83% ee;  $[\alpha]_D^{20} = -128.6$  (c. 0.435, acetone); m.p. 119.3-119.8 °C; HPLC (IA-H, DCM/*i*-propanol/*n*-hexane = 10/10/80, flow rate = 1.0 mL/min,  $\lambda = 254$  nm)  $t_R = 19.6$  min (minor), 36.1 min (major);  $^1\text{H NMR}$  (300 MHz, DMSO- $d_6$ )  $\delta$  4.42 (d,  $J = 8.6$  Hz, 1H), 4.84-4.89 (m, 1H), 5.14 (d,  $J = 10.8$  Hz, 1H), 6.73 (d,  $J = 7.7$  Hz, 1H), 6.84 (t,  $J = 7.6$  Hz, 1H), 6.94 (s, 1H), 7.12-7.21 (m, 2H), 7.22-7.28 (m, 4H), 7.30-7.40 (m, 5H), 7.46 (d,  $J = 7.6$  Hz, 1H), 10.41 (s, 1H);  $^{13}\text{C NMR}$  (75 MHz, DMSO- $d_6$ )  $\delta$  50.6, 60.6 (q,  $J = 29.7$  Hz, 1C), 67.4, 72.3, 103.0, 109.4, 120.7, 125.0, 126.2 (q,  $J = 275.3$  Hz, 1C), 126.7, 127.0, 128.0, 128.3, 128.6, 129.0, 130.0, 130.2, 133.5, 142.3, 150.8, 176.1; HRMS (ESI-TOF) calcd. for  $\text{C}_{27}\text{H}_{19}\text{F}_3\text{N}_2\text{NaO}_3$   $[\text{M} + \text{Na}]^+$  499.1240, found: 499.1240.

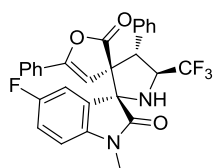

Compound **3h**: White solid; 49.4 mg, 97% yield; >20:1 dr, 99% ee;  $[\alpha]_D^{20} = -155.4$  (c. 0.579, acetone); m.p. 207.4-208.1 °C; HPLC (IA-H, *i*-propanol/*n*-hexane = 10/90, flow rate = 1.0 mL/min,  $\lambda = 254$  nm)  $t_R = 21.9$  min (minor), 33.9 min (major);  $^1\text{H NMR}$  (300 MHz, DMSO- $d_6$ )  $\delta$  3.09 (s, 3H), 4.63 (d,  $J = 8.2$  Hz, 1H), 4.76-4.92 (m, 1H), 5.12 (d,  $J = 10.7$  Hz, 1H), 6.94 (dd,  $J = 8.6, 4.3$  Hz, 1H), 6.98 (s, 1H), 7.07-7.23 (m, 2H), 7.23-7.32 (m, 4H), 7.34-7.46 (m, 6H);  $^{13}\text{C NMR}$  (75 MHz, DMSO- $d_6$ )  $\delta$  26.2, 50.7, 60.6 (q,  $J = 29.9$  Hz, 1C), 67.4, 72.2, 102.6, 109.3 (d,  $J = 8.2$  Hz, 1C), 114.5 (d,  $J = 26.0$  Hz, 1C), 116.5 (d,  $J = 23.3$  Hz, 1C), 124.4, 126.0 (q,  $J = 278.2$  Hz, 1C), 126.2 (d,  $J = 8.4$  Hz, 1C), 126.8, 128.2, 128.4, 128.6, 129.0, 130.3, 133.2, 139.9 (d,  $J = 1.6$  Hz, 1C), 151.2, 157.4 (d,  $J = 237.2$  Hz, 1C), 172.5, 174.5; HRMS (ESI-TOF) calcd. for  $\text{C}_{28}\text{H}_{20}\text{F}_4\text{N}_2\text{NaO}_3$   $[\text{M} + \text{Na}]^+$  531.1302, found: 531.1308.

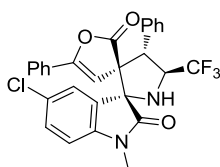

Compound **3i**: White solid; 53.0 mg, 99% yield; >20:1 dr, >99% ee;  $[\alpha]_D^{20} = -36.8$  (c. 0.572, acetone); m.p. 222.5-222.9 °C; HPLC (IA-H, DCM/*i*-propanol/*n*-hexane = 5/5/90, flow rate = 1.0 mL/min,  $\lambda = 254$  nm)  $t_R = 15.6$  min (minor), 35.2 min (major);  $^1\text{H NMR}$  (300 MHz, DMSO- $d_6$ )  $\delta$  3.09 (s, 3H), 4.66 (d,  $J = 8.2$  Hz, 1H), 4.76-4.95 (m, 1H), 5.09 (d,  $J = 10.8$  Hz, 1H), 6.95 (d,  $J = 8.4$  Hz, 1H), 7.02 (s, 1H), 7.14-7.23 (m, 1H), 7.23-7.34 (m, 5H), 7.35-7.43 (m, 5H), 7.61 (d,  $J = 2.2$  Hz, 1H);  $^{13}\text{C NMR}$  (75 MHz, DMSO- $d_6$ )  $\delta$  26.1, 50.6, 60.6 (q,  $J = 30.0$  Hz, 1C), 67.4, 72.2, 102.6, 109.8, 124.4, 125.4, 126.0 (q,  $J = 278.2$  Hz, 1C), 126.3, 126.7, 126.8, 128.1, 128.4, 128.6, 128.9, 129.9, 130.2, 133.1, 142.5, 151.3, 172.4, 174.3; HRMS (ESI-TOF) calcd. for  $\text{C}_{28}\text{H}_{20}\text{ClF}_3\text{N}_2\text{NaO}_3$   $[\text{M} + \text{Na}]^+$  547.1007, found: 547.1013

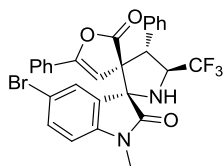

Compound **3j**: White solid; 49.2 mg, 86% yield; >20:1 dr, >99% ee;  $[\alpha]_D^{20} = -37.5$  (c. 0.512, acetone); m.p. 220.8-220.9 °C; HPLC (IA-H, *i*-propanol/*n*-hexane = 10/90, flow rate = 1.0 mL/min,  $\lambda = 254$  nm)  $t_R = 19.4$  min (minor), 35.3 min (major);  $^1\text{H NMR}$  (300 MHz, DMSO- $d_6$ )  $\delta$  3.08 (s, 3H), 4.65 (d,  $J = 8.2$  Hz, 1H), 4.76-4.98 (m, 1H), 5.07 (d,  $J = 10.7$  Hz, 1H), 6.90 (d,  $J = 8.4$  Hz, 1H), 7.02 (s, 1H), 7.15-7.33 (m, 5H), 7.38 (s, 5H), 7.44 (dd,  $J = 8.3, 2.0$  Hz, 1H), 7.74 (d,  $J = 2.0$  Hz, 1H);  $^{13}\text{C NMR}$  (75 MHz, DMSO- $d_6$ )  $\delta$  26.1, 50.5, 60.6 (q,  $J = 28.5$  Hz, 1C), 67.4, 72.2, 102.7, 110.3, 113.0, 124.4, 126.0 (q,  $J = 279.0$  Hz, 1C), 126.6, 126.8, 128.2, 128.4, 128.6, 129.0, 129.6, 130.3, 132.8, 133.2, 142.9, 151.3, 172.5, 174.2; HRMS (ESI-TOF) calcd. for  $\text{C}_{28}\text{H}_{20}\text{BrF}_3\text{N}_2\text{NaO}_3$   $[\text{M} + \text{Na}]^+$  591.0502, found: 591.0510

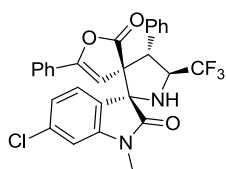

Compound **3k**: White solid; 51.3 mg, 98% yield; >20:1 dr, 98% ee;  $[\alpha]_D^{20} = -144.7$  (c. 0.647, acetone); m.p. 211.6-211.9 °C; HPLC (IA-H, *i*-propanol/*n*-hexane = 10/90, flow rate = 1.0 mL/min,  $\lambda = 254$  nm)  $t_R = 16.7$  min (minor), 25.0 min (major);  $^1\text{H NMR}$  (300 MHz, DMSO- $d_6$ )  $\delta$  3.11 (s, 3H), 4.62 (d,  $J = 8.3$  Hz, 1H), 4.74-4.98 (m, 1H), 5.12 (d,  $J = 10.6$  Hz, 1H), 6.94 (s, 1H), 7.02 (d,  $J = 8.0$  Hz, 1H), 7.10 (s, 1H), 7.14-7.34 (m, 5H), 7.37 (s, 5H), 7.50 (d,  $J = 8.0$  Hz, 1H);  $^{13}\text{C NMR}$  (75 MHz, DMSO- $d_6$ )  $\delta$  26.1, 50.8, 60.5 (q,  $J = 30.0$  Hz, 1C), 67.4, 71.7, 102.5, 108.9, 121.0, 123.1, 124.5, 126.0 (q,  $J = 279.0$  Hz, 1C), 126.8, 127.7, 128.1, 128.3, 128.6, 128.9, 130.2, 133.2, 134.9, 145.2, 151.2, 172.5, 174.6; HRMS (ESI-TOF) calcd. for  $\text{C}_{28}\text{H}_{20}\text{ClF}_3\text{N}_2\text{NaO}_3$   $[\text{M} + \text{Na}]^+$  547.1007, found: 547.1012.

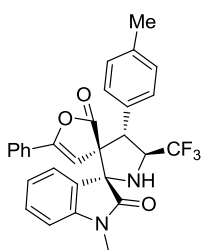

Compound **3l**: White solid; 48.3 mg, 95% yield; >20:1 dr, 98% ee;  $[\alpha]_D^{20} = -205.7$  (c. 0.483, acetone); m.p. 197.4-198.1 °C; HPLC (IA-H, DCM/*i*-propanol/*n*-hexane = 1/9/90, flow rate = 1.0 mL/min,  $\lambda = 254$  nm)  $t_R = 22.4$  min (minor), 35.7 min (major);  $^1\text{H NMR}$  (300 MHz, DMSO- $d_6$ )  $\delta$  2.16 (s, 3H), 3.09 (s, 3H), 4.49 (d,  $J = 8.7$  Hz, 1H), 4.73-4.91 (m, 1H), 5.13 (d,  $J = 10.9$  Hz, 1H), 6.88-6.97 (m, 3H), 7.06 (d,  $J = 7.9$  Hz, 2H), 7.15-7.29 (m, 3H), 7.32-7.42 (m, 5H), 7.50 (d,  $J = 7.5$  Hz, 1H);  $^{13}\text{C NMR}$  (75 MHz, DMSO)  $\delta$  20.5, 25.9, 50.3, 60.7 (q,  $J = 29.6$  Hz, 1C), 67.4, 72.1, 102.9, 108.3, 121.3, 124.3, 124.4, 126.1 (q,  $J = 279.0$  Hz, 1C), 126.2, 127.0, 127.1, 128.5, 128.9, 129.0, 130.0, 130.3, 137.2, 143.6, 150.9, 172.6, 174.5; HRMS (ESI-TOF) calcd. for  $\text{C}_{29}\text{H}_{23}\text{F}_3\text{N}_2\text{NaO}_3$   $[\text{M} + \text{Na}]^+$  527.1553, found: 527.1554.

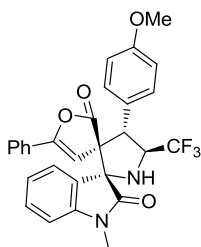

Compound **3m**: White solid; 42.3 mg, 81% yield; >20:1 dr, 95% ee;  $[\alpha]_D^{20} = -154.4$  (c. 0.416, acetone); m.p. 198.5-199.6 °C; HPLC (IA-H, DCM/*i*-propanol/*n*-hexane = 8/8/84, flow rate = 1.0 mL/min,  $\lambda = 254$  nm)  $t_R = 12.7$  min (minor), 21.0 min (major);  $^1\text{H NMR}$  (300 MHz, DMSO- $d_6$ )  $\delta$  3.09 (s, 3H), 3.63 (s, 3H), 4.48 (d,  $J = 8.5$  Hz, 1H), 4.65-4.91 (m, 1H), 5.11 (d,  $J = 10.8$  Hz, 1H), 6.82 (d,  $J = 8.2$  Hz, 2H), 6.88-7.00 (m, 3H), 7.17-7.30 (m, 3H), 7.38 (s, 5H), 7.51 (d,  $J = 7.5$  Hz, 1H);  $^{13}\text{C NMR}$  (75 MHz, DMSO- $d_6$ )  $\delta$  25.9, 50.1, 54.9, 60.9 (q,  $J = 30.0$  Hz, 1C), 67.5, 72.0, 103.0, 108.4, 113.7, 121.4, 124.4, 125.1, 126.2 (q,  $J = 279.0$  Hz, 1C), 126.3, 127.0, 129.0, 129.8, 130.1, 130.3, 143.6, 150.9, 158.8, 172.8, 174.6; HRMS (ESI-TOF) calcd. for  $\text{C}_{29}\text{H}_{23}\text{F}_3\text{N}_2\text{NaO}_4$   $[\text{M} + \text{Na}]^+$  543.1502, found: 543.1519.

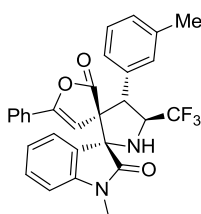

Compound **3n**: White solid; 55.9 mg, 99% yield; >20:1 dr, 97% ee;  $[\alpha]_D^{20} = -143.4$  (c. 0.597, acetone); m.p. 199.5-200.2 °C; HPLC (IA-H, DCM/*i*-propanol/*n*-hexane = 1/9/90, flow rate = 1.0 mL/min,  $\lambda = 254$  nm)  $t_R = 18.8$  min (minor), 33.1 min (major);  $^1\text{H NMR}$  (300 MHz, DMSO- $d_6$ )  $\delta$  2.16 (s, 3H), 3.05 (s, 3H), 4.48 (d,  $J = 8.7$  Hz, 1H), 4.71-4.90 (m, 1H), 5.09 (d,  $J = 10.8$  Hz, 1H), 6.83-7.00 (m, 4H), 7.02-7.15 (m, 3H), 7.21 (t,  $J = 7.4$  Hz, 1H), 7.29-7.39 (m, 5H), 7.47 (d,  $J = 7.2$  Hz, 1H);  $^{13}\text{C NMR}$  (75 MHz, DMSO- $d_6$ )  $\delta$  20.9, 25.9, 50.7, 60.7 (q,  $J = 30.0$  Hz, 1C), 67.5, 72.1, 103.0, 108.3, 121.4, 124.3, 124.4, 125.6, 126.1 (q,  $J = 278.3$  Hz, 1C), 126.2, 127.0, 128.1, 128.7, 128.9, 129.4, 130.0, 130.3, 133.4, 137.4, 143.6, 150.9, 172.7, 174.5; HRMS (ESI-TOF) calcd. for  $\text{C}_{29}\text{H}_{23}\text{F}_3\text{N}_2\text{NaO}_3$   $[\text{M} + \text{Na}]^+$  527.1553, found: 527.1560.

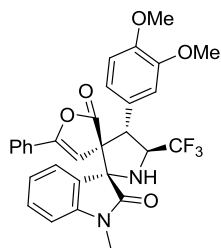

Compound **3o**: White solid; 47.6 mg, 86% yield; >20:1 dr, 98% ee;  $[\alpha]_D^{20} = -163.7$  (c. 0.427, acetone); m.p. 192.7-193.5 °C; HPLC (IA-H, DCM/*i*-propanol/*n*-hexane = 6/6/88, flow rate = 1.0 mL/min,  $\lambda = 254$  nm)  $t_R = 21.7$  min (minor), 34.8 min (major);  $^1\text{H NMR}$  (300 MHz, DMSO- $d_6$ )  $\delta$  3.09 (s, 3H), 3.63 (s, 3H), 3.66 (s, 3H), 4.48 (d,  $J = 8.2$  Hz, 1H), 4.75-4.93 (m, 1H), 5.08 (d,  $J = 10.8$  Hz, 1H), 6.79 (q,  $J = 8.2$  Hz, 2H), 6.87-6.99 (m, 3H), 7.11 (s, 1H), 7.25 (t,  $J = 7.7$  Hz, 1H), 7.33-7.44 (m, 5H), 7.47 (d,  $J = 7.5$  Hz, 1H);  $^{13}\text{C NMR}$  (75 MHz, DMSO- $d_6$ )  $\delta$  25.9, 50.6, 55.2, 55.6, 60.9 (q,  $J = 29.3$  Hz, 1C), 67.5, 71.9, 103.4, 108.4, 111.2, 112.0, 121.3, 121.4, 124.3, 124.5, 125.5, 126.6 (q,  $J = 279.0$  Hz, 1C), 126.3, 127.1, 129.0, 130.1, 130.3, 143.6, 148.0, 148.4, 150.7, 172.8, 174.7; HRMS (ESI-TOF) calcd. for  $\text{C}_{30}\text{H}_{25}\text{F}_3\text{N}_2\text{NaO}_5$   $[\text{M} + \text{Na}]^+$  573.1608, found: 573.1609.

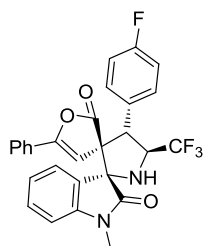

Compound **3p**: White solid; 47.3 mg, 99% yield; >20:1 dr, 98% ee;  $[\alpha]_D^{20} = -172.1$  (c. 0.564, acetone); m.p. 198.8-199.3 °C; HPLC (IA-H, *i*-propanol/*n*-hexane = 10/90, flow rate = 1.0 mL/min,  $\lambda = 254$  nm)  $t_R = 25.5$  min (minor), 37.3 min (major);  $^1\text{H NMR}$  (300 MHz, DMSO- $d_6$ )  $\delta$  3.10 (s, 3H), 4.56 (d,  $J = 8.5$  Hz, 1H), 4.76-4.95 (m, 1H), 5.17 (d,  $J = 10.9$  Hz, 1H), 6.88-7.00 (m, 3H), 7.11 (t,  $J = 8.7$  Hz, 2H), 7.25 (t,  $J = 7.7$  Hz, 1H), 7.30-7.44 (m, 7H), 7.50 (d,  $J = 7.3$  Hz, 1H);  $^{13}\text{C NMR}$  (75 MHz, DMSO- $d_6$ )  $\delta$  26.0, 50.0, 60.8 (q,  $J = 29.2$  Hz, 1C), 67.4, 72.0, 102.7, 108.4, 115.3 (d,  $J = 21.4$  Hz, 1C), 121.4, 124.3, 124.5, 126.1 (q,  $J = 279.0$  Hz, 1C), 126.3, 126.9, 129.0, 129.6 (d,  $J = 3.1$  Hz, 1C), 130.2, 130.4, 130.7 (d,  $J = 8.2$  Hz, 1C), 143.6, 151.1, 161.7 (d,  $J = 244.7$  Hz, 1C), 172.6, 174.5; HRMS (ESI-TOF) calcd. for  $\text{C}_{28}\text{H}_{20}\text{F}_4\text{N}_2\text{NaO}_3$   $[\text{M} + \text{Na}]^+$  531.1302, found: 531.1305.

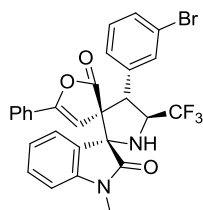

Compound **3q**: White solid; 59.5 mg, 96% yield; >20:1 dr, 98% ee;  $[\alpha]_D^{20} = -160.8$  (c. 1.282, acetone); m.p. 204.1-204.5 °C; HPLC (IA-H, *i*-propanol/*n*-hexane = 15/85, flow rate = 1.0 mL/min,  $\lambda = 254$  nm)  $t_R = 13.1$  min (minor), 21.7 min (major);  $^1\text{H NMR}$  (300 MHz, DMSO- $d_6$ )  $\delta$  3.09 (s, 3H), 4.59 (d,  $J = 8.3$  Hz, 1H), 4.79-5.03 (m, 1H), 5.14 (d,  $J = 10.8$  Hz, 1H), 6.94 (t,  $J = 7.4$  Hz, 2H), 7.02 (s, 1H), 7.18-7.29 (m, 2H), 7.30-7.45 (m, 7H), 7.48 (d,  $J = 7.4$  Hz, 1H), 7.56 (s, 1H);  $^{13}\text{C NMR}$  (75 MHz, DMSO- $d_6$ )  $\delta$  26.0, 50.4, 60.6 (q,  $J = 29.2$  Hz, 1C), 67.4, 72.0, 102.6, 108.5, 121.5, 124.2, 124.5, 126.0, 126.3, 126.8, 127.9, 129.0, 130.3, 130.4, 130.6, 131.2, 131.3, 136.1, 143.6, 151.3, 172.6, 174.5; HRMS (ESI-TOF) calcd. for  $\text{C}_{28}\text{H}_{20}\text{BrF}_3\text{N}_2\text{NaO}_3$   $[\text{M} + \text{Na}]^+$  591.0502, found: 591.0510.

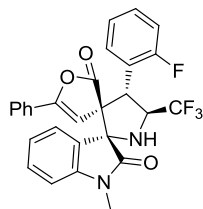

Compound **3r**: White solid; 40.7 mg, 81% yield; >20:1 dr, 98% ee;  $[\alpha]_D^{20} = -78.5$  (c. 0.407, acetone); m.p. 188.5-188.9 °C; HPLC (IA-H, DCM/*i*-propanol/*n*-hexane = 6/6/88, flow rate = 1.0 mL/min,  $\lambda = 254$  nm)  $t_R = 14.2$  min (minor), 24.5 min (major);  $^1\text{H NMR}$  (300 MHz, DMSO- $d_6$ )  $\delta$  3.10 (s, 3H), 4.58 (d,  $J = 8.8$  Hz, 1H), 4.77-4.97 (m, 1H), 5.61 (d,  $J = 10.7$  Hz, 1H), 6.89-6.99 (m, 3H), 7.06-7.19 (m, 2H), 7.20-7.32 (m, 2H), 7.32-7.45 (m, 5H), 7.46-7.62 (m, 2H);  $^{13}\text{C NMR}$  (75 MHz, DMSO- $d_6$ )  $\delta$  26.0, 40.9, 60.6 (q,  $J = 31.5$  Hz, 1C), 66.9, 72.0, 102.7, 108.4, 115.6 (d,  $J = 22.5$  Hz, 1C), 120.3 (d,  $J = 12.8$  Hz, 1C), 121.5, 124.1, 124.2, 124.5, 126.1 (q,  $J = 269.2$  Hz, 1C), 126.3, 126.9, 129.1, 130.1, 130.3, 130.4, 130.8, 143.7, 151.2, 160.4 (d,  $J = 244.5$  Hz, 1C), 172.2, 174.5; HRMS (ESI-TOF) calcd. for  $\text{C}_{28}\text{H}_{20}\text{F}_4\text{N}_2\text{NaO}_3$   $[\text{M} + \text{Na}]^+$  531.1302, found: 531.1313.

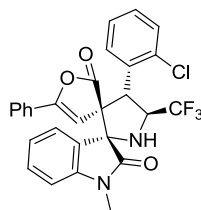

Compound **3s**: White solid; 55.4 mg, 99% yield; >20:1 dr, 94% ee;  $[\alpha]_{\text{D}}^{20} = -67.4$  (c. 0.583, acetone); m.p. 205.2-205.9 °C; HPLC (AD-H, *i*-propanol/*n*-hexane = 9/91, flow rate = 1.0 mL/min,  $\lambda = 254$  nm)  $t_{\text{R}} = 59.9$  min (minor), 65.0 min (major);  $^1\text{H NMR}$  (300 MHz, DMSO- $d_6$ )  $\delta$  3.10 (s, 3H), 4.59 (d,  $J = 8.5$  Hz, 1H), 4.66-4.86 (m, 1H), 6.15 (d,  $J = 10.6$  Hz, 1H), 6.93 (t,  $J = 8.5$  Hz, 2H), 7.11 (s, 1H), 7.15-7.30 (m, 3H), 7.32-7.48 (m, 6H), 7.51 (d,  $J = 7.2$  Hz, 1H), 7.76 (d,  $J = 7.1$  Hz, 1H);  $^{13}\text{C NMR}$  (75 MHz, DMSO- $d_6$ )  $\delta$  26.0, 45.4, 62.2 (q,  $J = 30.0$  Hz, 1C), 66.6, 72.3, 103.0, 108.4, 121.4, 124.2, 124.5, 126.0 (q,  $J = 278.2$  Hz, 1C), 126.3, 126.5, 127.0, 129.0, 129.6, 129.7, 130.2, 130.4, 130.9, 131.2, 134.1, 143.8, 151.1, 172.0, 174.5; HRMS (ESI-TOF) calcd. for  $\text{C}_{28}\text{H}_{20}\text{ClF}_3\text{N}_2\text{NaO}_3$   $[\text{M} + \text{Na}]^+$  547.1007, found: 547.1003.

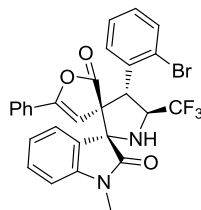

Compound **3t**: White solid; 61.2 mg, 98% yield; >20:1 dr, 98% ee;  $[\alpha]_{\text{D}}^{20} = -10.6$  (c. 0.731, acetone); m.p. 196.8-197.3 °C; HPLC (AD-H, *i*-propanol/*n*-hexane = 9/91, flow rate = 1.0 mL/min,  $\lambda = 254$  nm)  $t_{\text{R}} = 69.5$  min (major), 77.4 min (minor);  $^1\text{H NMR}$  (300 MHz, DMSO- $d_6$ )  $\delta$  3.10 (s, 3H), 4.57 (d,  $J = 8.6$  Hz, 1H), 4.63-4.82 (m, 1H), 6.14 (d,  $J = 10.7$  Hz, 1H), 6.94 (t,  $J = 7.5$  Hz, 2H), 7.10 (d,  $J = 10.3$  Hz, 2H), 7.21-7.32 (m, 2H), 7.34-7.48 (m, 5H), 7.51 (d,  $J = 7.5$  Hz, 1H), 7.56 (d,  $J = 7.9$  Hz, 1H), 7.73 (d,  $J = 7.8$  Hz, 1H);  $^{13}\text{C NMR}$  (75 MHz, DMSO- $d_6$ )  $\delta$  26.0, 48.2, 62.6, 66.7, 72.3, 103.0, 108.4, 121.4, 124.2, 124.5, 125.1, 126.1, 126.4, 126.9, 127.0, 129.0, 129.9, 130.2, 130.4, 131.0, 133.0, 133.1, 143.8, 151.0, 171.9, 174.4; HRMS (ESI-TOF) calcd. for  $\text{C}_{28}\text{H}_{20}\text{BrF}_3\text{N}_2\text{NaO}_3$   $[\text{M} + \text{Na}]^+$  591.0502, found: 591.0505.

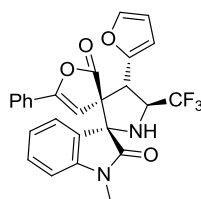

Compound **3u**: White solid; 45.6 mg, 95% yield; >20:1 dr, 94% ee;  $[\alpha]_{\text{D}}^{20} = -203.5$  (c. 0.450, acetone); m.p. 192.9-193.7 °C; HPLC (IA-H, DCM/*i*-propanol/*n*-hexane = 1/9/90, flow rate = 1.0 mL/min,  $\lambda = 254$  nm)  $t_{\text{R}} = 18.6$  min (minor), 37.5 min (major);  $^1\text{H NMR}$  (300 MHz, DMSO- $d_6$ )  $\delta$  3.09 (s, 3H), 4.59 (d,  $J = 9.1$  Hz, 1H), 4.63-4.84 (m, 1H), 5.25 (d,  $J = 10.5$  Hz, 1H), 6.26-6.43 (m, 2H), 6.72 (s, 1H), 6.87-6.99 (m, 2H), 7.27 (t,  $J = 7.7$  Hz, 1H), 7.35-7.47 (m, 5H), 7.47-7.58 (m, 2H);  $^{13}\text{C NMR}$  (75 MHz, DMSO- $d_6$ )  $\delta$  25.9, 44.7, 60.2 (q,  $J = 30.0$  Hz, 1C), 66.2, 71.9, 102.7, 108.4, 108.5, 110.6, 121.4, 123.7, 124.5, 125.8 (q,  $J = 278.3$  Hz, 1C), 126.2, 126.9, 129.0, 130.2, 130.4, 143.2, 143.6, 148.0, 151.3, 172.3, 174.2; HRMS (ESI-TOF) calcd. for  $\text{C}_{26}\text{H}_{19}\text{F}_3\text{N}_2\text{NaO}_4$   $[\text{M} + \text{Na}]^+$  503.1189, found: 503.1184.

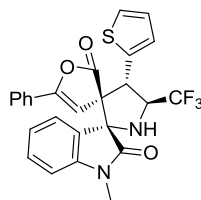

Compound **3v**: White solid; 49.3 mg, 99% yield; >20:1 dr, >99% ee;  $[\alpha]_{\text{D}}^{20} = -134.7$  (c. 0.501, acetone); m.p. 198.0-198.3 °C; HPLC (IA-H, DCM/*i*-propanol/*n*-hexane = 1/9/90, flow rate = 1.0 mL/min,  $\lambda = 254$  nm)  $t_{\text{R}} = 19.2$  min (minor), 34.6 min (major);  $^1\text{H NMR}$  (300 MHz, DMSO- $d_6$ )  $\delta$  3.05 (s, 3H), 4.50 (d,  $J = 8.8$  Hz, 1H), 4.54-4.70 (m, 1H), 5.45 (d,  $J = 10.3$  Hz, 1H), 6.84-6.96 (m, 4H), 7.03 (d,  $J = 3.5$  Hz, 1H), 7.23 (t,  $J = 7.7$  Hz, 1H), 7.31-7.45 (m, 6H), 7.50 (d,  $J = 7.5$  Hz, 1H);  $^{13}\text{C NMR}$  (75 MHz, DMSO- $d_6$ )  $\delta$  26.0, 46.1, 63.1 (q,  $J = 30.0$  Hz, 1C), 67.3, 71.8, 102.8, 108.5, 121.5, 124.1, 124.6, 125.9 (q,  $J = 278.3$  Hz, 1C), 126.3, 126.4, 126.9, 127.0, 127.4, 129.1, 130.3, 130.4, 143.6, 151.8, 172.4, 174.4; HRMS (ESI-TOF) calcd. for  $\text{C}_{26}\text{H}_{19}\text{F}_3\text{N}_2\text{NaO}_3\text{S}$   $[\text{M} + \text{Na}]^+$  519.0961, found: 519.0964.

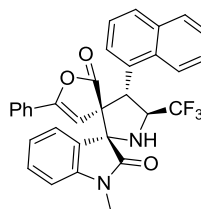

Compound **3w**: White solid; 51.0 mg, 94% yield; >20:1 dr, 98% ee;  $[\alpha]_{\text{D}}^{20} = +103.1$  (c. 0.483, acetone); m.p. 207.1-207.5 °C; HPLC (IA-H,

*i*-propanol/*n*-hexane = 10/90, flow rate = 1.0 mL/min,  $\lambda$  = 254 nm)  $t_R$  = 31.6 min (minor), 49.8 min (major);  $^1\text{H}$  NMR (300 MHz,  $\text{DMSO-}d_6$ )  $\delta$  3.17 (s, 3H), 4.65 (d,  $J$  = 8.4 Hz, 1H), 4.86-5.09 (m, 1H), 6.52 (d,  $J$  = 10.6 Hz, 1H), 6.85-7.06 (m, 2H), 7.20 (s, 1H), 7.27 (t,  $J$  = 7.7 Hz, 1H), 7.31-7.42 (m, 5H), 7.42-7.49 (m, 1H), 7.49-7.68 (m, 3H), 7.78 (d,  $J$  = 8.1 Hz, 1H), 7.87 (t,  $J$  = 7.1 Hz, 2H), 8.36 (d,  $J$  = 8.7 Hz, 1H);  $^{13}\text{C}$  NMR (75 MHz,  $\text{DMSO-}d_6$ )  $\delta$  26.1, 43.2, 62.2 (q,  $J$  = 30.0 Hz, 1C), 67.0, 72.4, 103.3, 108.5, 121.5, 122.5, 124.3, 124.4, 124.7, 125.8, 126.2, 126.4, 126.6, 126.9, 128.4, 128.8, 129.0, 129.0, 130.1, 130.4, 131.8, 133.4, 143.7, 151.3, 172.6, 174.9; HRMS (ESI-TOF) calcd. for  $\text{C}_{32}\text{H}_{23}\text{F}_3\text{N}_2\text{NaO}_3$   $[\text{M} + \text{Na}]^+$  563.1553, found: 563.1542.

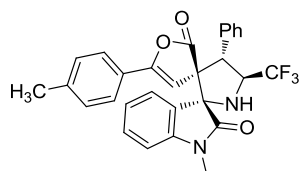

Compound **3x**: White solid; 51.8 mg, 99% yield; >20:1 dr, 98% ee;  $[\alpha]_D^{20}$  = -159.7 (c. 0.619, acetone); m.p. 217.2-218.1 °C; HPLC (IA-H, *i*-propanol/*n*-hexane = 10/90, flow rate = 1.0 mL/min,  $\lambda$  = 254 nm)  $t_R$  = 22.1 min (minor), 37.3 min (major);  $^1\text{H}$  NMR (300 MHz,  $\text{DMSO-}d_6$ )  $\delta$  2.24 (s, 3H), 3.09 (s, 3H), 4.52 (d,  $J$  = 8.7 Hz,

1H), 4.77-4.96 (m, 1H), 5.17 (d,  $J$  = 10.8 Hz, 1H), 6.86 (s, 1H), 6.92 (t,  $J$  = 8.2 Hz, 2H), 7.11-7.21 (m, 3H), 7.21-7.34 (m, 7H), 7.51 (d,  $J$  = 7.4 Hz, 1H);  $^{13}\text{C}$  NMR (75 MHz,  $\text{DMSO-}d_6$ )  $\delta$  20.9, 25.9, 50.7, 60.6 (q,  $J$  = 30.0 Hz, 1C), 67.5, 72.1, 101.8, 108.4, 121.4, 124.2, 124.4, 126.2 (q,  $J$  = 278.5 Hz, 1C), 126.3, 128.0, 128.3, 128.6, 129.5, 130.3, 133.5, 140.0, 143.6, 151.1, 172.8, 174.6; HRMS (ESI-TOF) calcd. for  $\text{C}_{29}\text{H}_{23}\text{F}_3\text{N}_2\text{NaO}_3$   $[\text{M} + \text{Na}]^+$  527.1553, found: 527.1547.

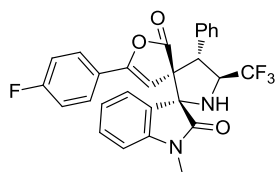

Compound **3y**: White solid; 49.8 mg, 98% yield; >20:1 dr, 98% ee;  $[\alpha]_D^{20}$  = -151.4 (c. 0.606, acetone); m.p. 197.2-197.5 °C; HPLC (IA-H, *i*-propanol/*n*-hexane = 10/90, flow rate = 1.0 mL/min,  $\lambda$  = 254 nm)  $t_R$  = 24.4 min (minor), 42.2 min (major);  $^1\text{H}$  NMR (300 MHz,  $\text{DMSO-}d_6$ )  $\delta$  3.09 (s, 3H), 4.56 (d,  $J$  = 8.4 Hz, 1H), 4.76-4.96 (m, 1H), 5.17 (d,  $J$  =

10.8 Hz, 1H), 6.86-6.99 (m, 3H), 7.14-7.35 (m, 8H), 7.37-7.47 (m, 2H), 7.51 (d,  $J$  = 7.4 Hz, 1H);  $^{13}\text{C}$  NMR (75 MHz,  $\text{DMSO-}d_6$ )  $\delta$  25.9, 60.2 (q,  $J$  = 30.0 Hz, 1C), 61.2, 67.6, 72.1, 102.7 (d,  $J$  = 2.3 Hz, 1C), 108.4, 116.1, 121.4, 123.5 (d,  $J$  = 3.0 Hz, 1C), 124.3, 126.1 (q,  $J$  = 279.0 Hz, 1C), 126.3, 126.9 (d,  $J$  = 8.2 Hz, 1C), 128.1, 128.4, 128.6, 130.3, 133.4, 143.7, 150.0, 162.9 (d,  $J$  = 246.7 Hz, 1C), 172.6, 174.5; HRMS (ESI-TOF) calcd. for  $\text{C}_{28}\text{H}_{20}\text{F}_4\text{N}_2\text{NaO}_4$   $[\text{M} + \text{Na}]^+$  531.1302, found: 531.1309

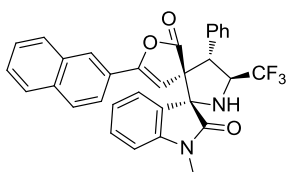

Compound **3z**: White solid; 52.2 mg, 96% yield; >20:1 dr, 97% ee;  $[\alpha]_D^{20}$  = -165.7 (c. 0.652, acetone); m.p. 199.5-199.8 °C; HPLC (IA-H, *i*-propanol/*n*-hexane = 10/90, flow rate = 1.0 mL/min,  $\lambda$  = 254 nm)  $t_R$  = 29.1 min (minor), 43.5 min (major);  $^1\text{H}$  NMR (300 MHz,  $\text{DMSO-}d_6$ )  $\delta$  3.11 (s, 3H), 4.59 (d,  $J$  = 8.2 Hz, 1H), 4.80-5.03 (m, 1H), 5.22 (d,  $J$  =

10.7 Hz, 1H), 6.82-7.00 (m, 2H), 7.07-7.30 (m, 5H), 7.31-7.42 (m, 2H), 7.43-7.62 (m, 3H), 7.68 (d,  $J$  = 8.5 Hz, 1H), 7.74 (s, 1H), 7.87 (t,  $J$  = 6.6 Hz, 2H), 7.96 (d,  $J$  = 8.6 Hz, 1H);  $^{13}\text{C}$  NMR (75 MHz,  $\text{DMSO-}d_6$ )  $\delta$  26.0, 50.8, 60.7 (q,  $J$  = 29.3 Hz, 1C), 67.7, 72.2, 103.8, 108.4, 121.4, 121.7, 123.9, 124.2, 124.4, 126.2 (q,  $J$  = 279.0 Hz, 1C), 126.4, 127.1, 127.5, 127.7, 128.1, 128.4, 128.6, 128.7, 128.9, 130.4, 132.4, 133.3, 133.5, 143.7, 151.0, 172.7, 174.6; HRMS (ESI-TOF) calcd. for  $\text{C}_{32}\text{H}_{23}\text{F}_3\text{N}_2\text{NaO}_3$   $[\text{M} + \text{Na}]^+$  563.1553, found: 563.1547.



#### 4. Procedure for the synthesis of compounds **4**<sup>4</sup> and **6**<sup>5</sup>.

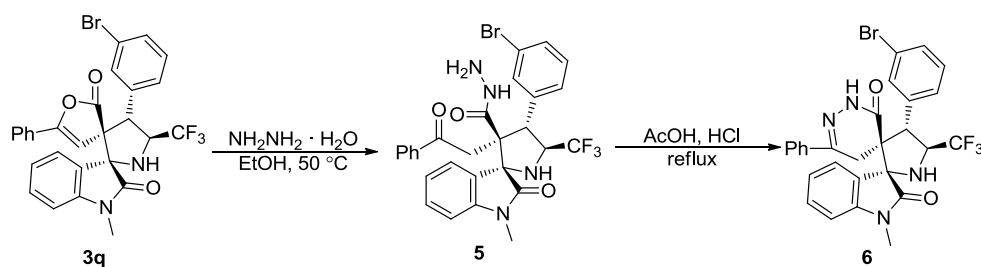

Hydrazine hydrate (80%, 1.0 mL) was added to a stirred solution of **3q** (0.4 mmol, 228.8 mg) in absolute ethanol (13.0 mL) and the reaction mixture was stirred for 20 min at 50 °C. The white solid disappears. After completion of the reaction as indicated by TLC. The resulting mixture concentrated under reduced pressure and obtained pale yellow oil **5**.

A mixture of glacial acetic acid (1.0 mL), hydrochloric acid (34%, 4.0 mL) and pale yellow oil was refluxed for 20 min. White precipitate was formed. After completion of the reaction and mixture was allowed to cool and ice-cold water (15 mL) was poured into. The aqueous phase extracted with DCM (3 x 10 mL). The organic phase were combined and dried over Na<sub>2</sub>SO<sub>4</sub>, then the solvent was evaporated. The crude product was purified on a column of silica gel and eluted with petroleum ether/EtOAc (8:1). Afforded 231.9 mg of **6**.

Compound **6**: White solid; 231.9 mg, 99% yield; >20:1 dr, >99% ee; [ $\alpha$ ]<sub>D</sub><sup>20</sup> = -360.1 (c. 1.150, acetone); m.p. 199.8-200.7 °C; HPLC (IA-H, *i*-propanol/*n*-hexane = 15/85, flow rate = 1.0 mL/min,  $\lambda$  = 254 nm)  $t_R$  = 10.0 min (major), 14.6 min (minor); <sup>1</sup>H NMR (300 MHz, CDCl<sub>3</sub>)  $\delta$  2.45 (s, 3H), 2.74 (d,  $J$  = 16.6 Hz, 1H), 2.87 (d,  $J$  = 8.7 Hz, 1H), 3.20 (d,  $J$  = 16.7 Hz, 1H), 4.50 (d,  $J$  = 10.7 Hz, 1H), 5.30 (dq,  $J$  = 15.8, 7.1 Hz, 1H), 6.40 (d,  $J$  = 7.8 Hz, 1H), 6.87 (t,  $J$  = 7.6 Hz, 1H), 7.15-7.29 (m, 6H), 7.29-7.36 (m, 2H), 7.44 (d,  $J$  = 8.1 Hz, 1H), 7.60 (d,  $J$  = 7.9 Hz, 1H), 7.84 (s, 1H), 9.23 (s, 1H); <sup>13</sup>C NMR (75 MHz, DMSO)  $\delta$  24.7, 49.8, 55.9, 61.6 (q,  $J$  = 29.1 Hz, 1C), 71.0, 79.1, 108.0, 121.4, 122.3, 124.7, 124.9, 125.3, 126.2 (q,  $J$  = 279.0 Hz, 1C), 128.1, 129.4, 129.7, 129.8, 130.1, 130.8, 132.8, 135.1, 136.4, 143.2, 149.0, 165.5, 175.5; HRMS (ESI-TOF) calcd. for C<sub>28</sub>H<sub>22</sub>BrF<sub>3</sub>N<sub>4</sub>NaO<sub>2</sub> [M + Na]<sup>+</sup> 605.0707, found: 605.0765.

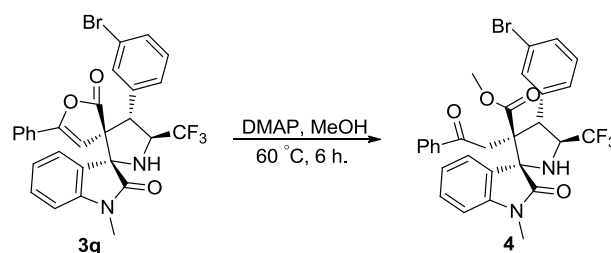

To a solution of **3q** (113.7 mg, 0.20 mmol) (>99:1 dr) in methanol (3 mL) was added DMAP (24.4 mg, 0.2 mmol). The reaction mixture was stirred at 60 °C for 5 h before being concentrated in vacuo to give crude product. Chromatographic purification (eluent PE/EA 3:1) gave product as a white solid.

Compound **6**: White solid; 116.7 mg, 97% yield; >20:1 dr, 98% ee; [ $\alpha$ ]<sub>D</sub><sup>20</sup> = -154.5 (c. 2.334, CHCl<sub>3</sub>); m.p. 199.8-200.7 °C; HPLC (IA-H, *i*-propanol/*n*-hexane = 10/90, flow rate = 1.0 mL/min,

---

$\lambda = 254 \text{ nm}$   $t_R = 21.8 \text{ min}$  (minor),  $29.5 \text{ min}$  (major);  $^1\text{H NMR}$  (300 MHz,  $\text{DMSO-}d_6$ )  $\delta$  3.06 (s, 3H), 3.18 (d,  $J = 18.1 \text{ Hz}$ , 1H), 3.32 (s, 3H), 3.88 (d,  $J = 8.8 \text{ Hz}$ , 1H), 4.54 (d,  $J = 18.1 \text{ Hz}$ , 1H), 4.87 (dq,  $J = 18.1, 7.8 \text{ Hz}$ , 1H), 5.09 (d,  $J = 11.0 \text{ Hz}$ , 1H), 6.99 (d,  $J = 7.7 \text{ Hz}$ , 2H), 7.10-7.19 (m, 1H), 7.19-7.29 (m, 1H), 7.38 (t,  $J = 7.4 \text{ Hz}$ , 2H), 7.46-7.57 (m, 3H), 7.59-7.65 (m, 1H), 7.73 (d,  $J = 7.2 \text{ Hz}$ , 2H), 7.78 (d,  $J = 7.3 \text{ Hz}$ , 1H);  $^{13}\text{C NMR}$  (75 MHz,  $\text{DMSO-}d_6$ )  $\delta$  25.8, 47.1, 51.4, 60.7 (q,  $J = 29.2 \text{ Hz}$ , 1C), 60.9, 73.5, 108.4, 120.8, 121.6, 121.8, 126.1, 126.3, 126.4 (q,  $J = 279.0 \text{ Hz}$ , 1C), 127.4, 128.6, 128.9, 129.9, 130.0, 130.1, 133.2, 135.7, 139.0, 144.5, 170.4, 175.3, 194.4; HRMS (ESI-TOF) calcd. for  $\text{C}_{29}\text{H}_{24}\text{BrF}_3\text{N}_2\text{NaO}_4$   $[\text{M} + \text{Na}]^+$  623.0764, found: 623.0786.

1. Koch, R.; Berstermann, H. M.; Wentrup, C. *J. Org. Chem.* 2014, **79**, 65.
2. Deo, U.; Inam, F.; Masahsabde, R. P.; Jadhav, A. N. *Asian Journal of Chemistry.* 2010, **22**, 3362.
3. Ma, M.; Zhu, Y.; Sun, Q.; Li, X.; Su, J.; Zhao, L.; Zhao, Y.; Qiu, S.; Yan, W.; Wang, K.; Wang, R. *Chem. Commun.* 2015, **51**, 8789.
4. Farag, A. M.; Elkholy, Y. M.; Ali, K. A. *Heterocyclic Chem.* 2008, **45**, 279.
5. Morrill, L. C.; Douglas, J.; Lebl, T.; Slawin, A. M. Z.; Fox, D. J.; Smith, A. D. *Chem. Sci.*, 2013, **4**, 4146.

## 5. X-ray crystal structure of compound **3q**

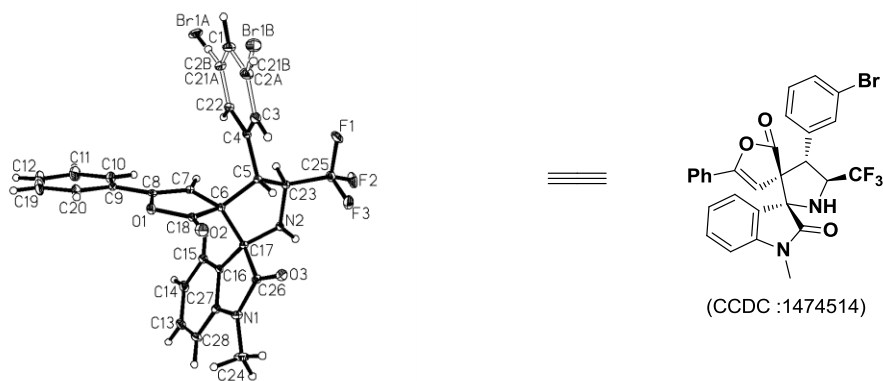

|                                   |                                                                                        |
|-----------------------------------|----------------------------------------------------------------------------------------|
| Empirical formula                 | $C_{28}H_{20}BrF_3N_2O_3$                                                              |
| Formula weight                    | 688.74                                                                                 |
| Temperature                       | 100(2) K                                                                               |
| Wavelength                        | 0.71073 Å                                                                              |
| Crystal system                    | Orthorhombic                                                                           |
| Space group                       | $P2_12_12_1$                                                                           |
| Unit cell dimensions              | $a = 12.0262(12)$ Å = 90°.<br>$b = 13.8263(14)$ Å = 90°.<br>$c = 17.0090(17)$ Å = 90°. |
| Volume                            | 2828.2(5) Å <sup>3</sup>                                                               |
| Z                                 | 4                                                                                      |
| Density (calculated)              | 1.618 Mg/m <sup>3</sup>                                                                |
| Absorption coefficient            | 1.792 mm <sup>-1</sup>                                                                 |
| F(000)                            | 1384                                                                                   |
| Crystal size                      | 0.620 x 0.290 x 0.290 mm <sup>3</sup>                                                  |
| Theta range for data collection   | 1.898 to 31.013 °                                                                      |
| Index ranges                      | -17<=h<=17, -19<=k<=18, -24<=l<=24                                                     |
| Reflections collected             | 31413                                                                                  |
| Independent reflections           | 8298 [R(int) = 0.0349]                                                                 |
| Completeness to theta = 25.242 °  | 100.0 %                                                                                |
| Absorption correction             | Semi-empirical from equivalents                                                        |
| Refinement method                 | Full-matrix least-squares on F <sup>2</sup>                                            |
| Data / restraints / parameters    | 8298 / 0 / 381                                                                         |
| Goodness-of-fit on F <sup>2</sup> | 1.065                                                                                  |
| Final R indices [I>2sigma(I)]     | R1 = 0.0359, wR2 = 0.0866                                                              |
| R indices (all data)              | R1 = 0.0478, wR2 = 0.0902                                                              |
| Absolute structure parameter      | 0.021(3)                                                                               |
| Extinction coefficient            | n/a                                                                                    |
| Largest diff. peak and hole       | 0.734 d -0.601 e. Å <sup>-3</sup>                                                      |

6.  $^1\text{H}$ ,  $^{13}\text{C}$  NMR and HPLC spectra for compounds 3a-z and compounds 5, 6.

$^1\text{H}$  NMR,  $^{13}\text{C}$  NMR and HPLC of 3a

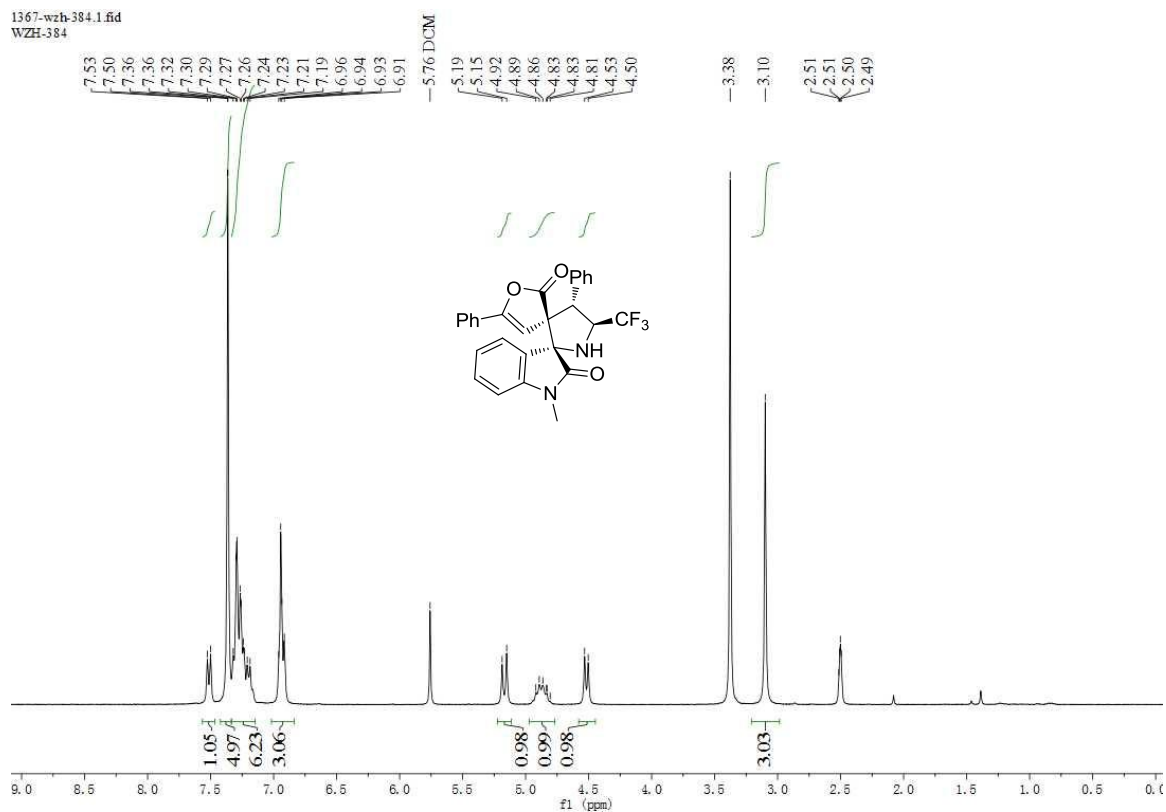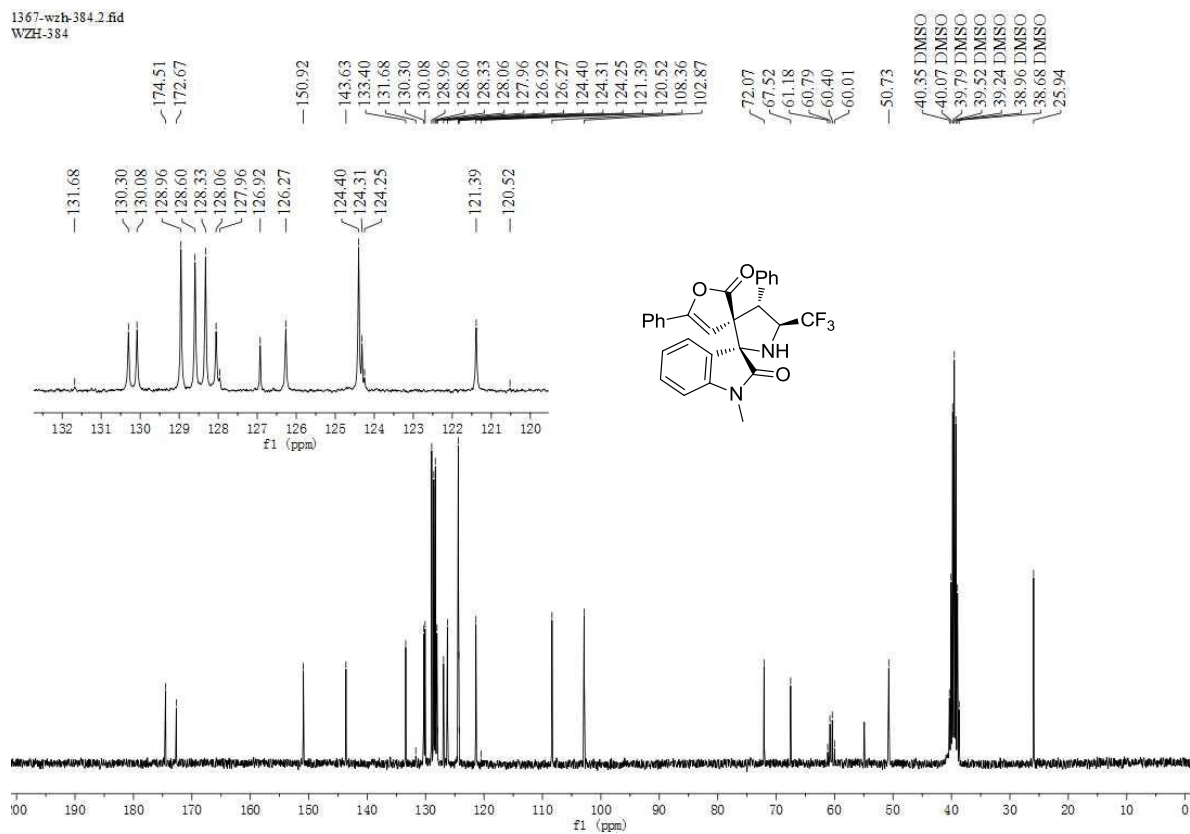

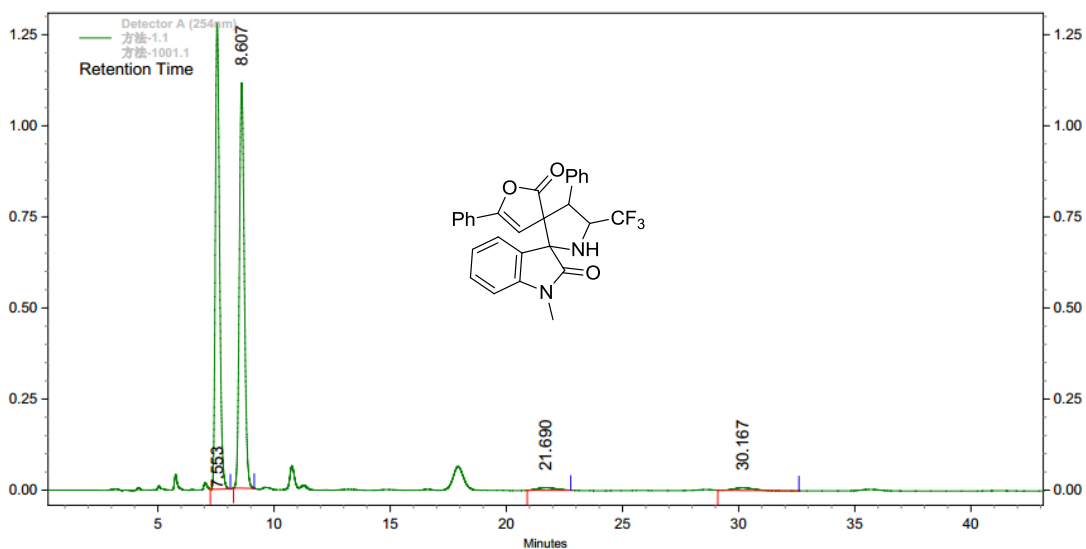

Detector  
A  
(254nm)

| Pk # | Retention Time | Height  | Height Percent | Area     | Area Percent |
|------|----------------|---------|----------------|----------|--------------|
| 1    | 7.553          | 1281849 | 53.25          | 16181023 | 48.43        |
| 2    | 8.607          | 1111282 | 46.17          | 16418205 | 49.14        |
| 3    | 21.690         | 6926    | 0.29           | 402212   | 1.20         |
| 4    | 30.167         | 7103    | 0.30           | 408224   | 1.22         |

| Totals |  |         |        |          |        |
|--------|--|---------|--------|----------|--------|
|        |  | 2407160 | 100.00 | 33409664 | 100.00 |

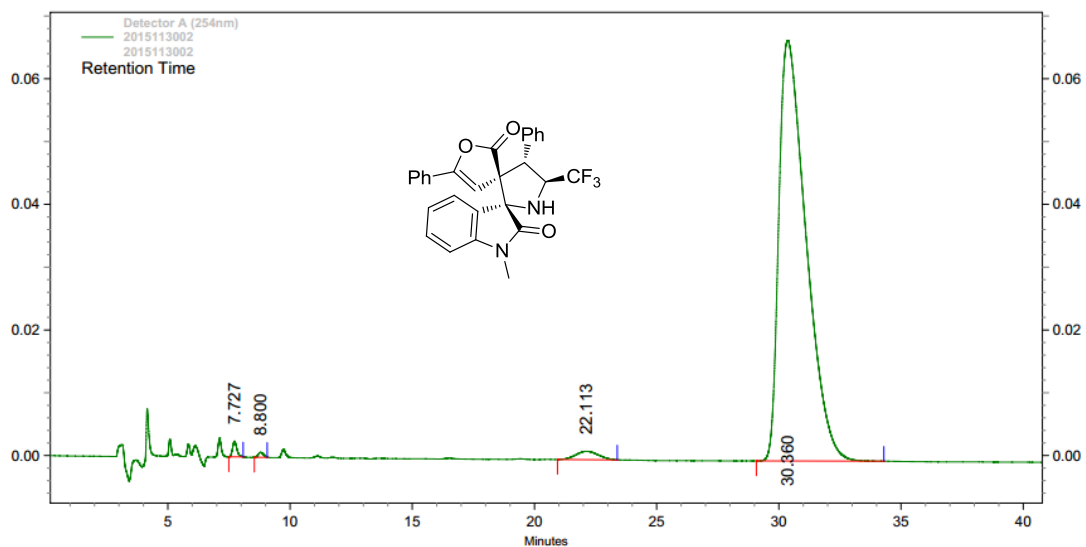

Detector  
A  
(254nm)

| Pk # | Retention Time | Height | Height Percent | Area    | Area Percent |
|------|----------------|--------|----------------|---------|--------------|
| 1    | 7.727          | 2516   | 3.51           | 30744   | 0.58         |
| 2    | 8.800          | 796    | 1.11           | 11413   | 0.22         |
| 3    | 22.113         | 1331   | 1.86           | 84997   | 1.60         |
| 4    | 30.360         | 66967  | 93.52          | 5174778 | 97.60        |

| Totals |  |       |        |         |        |
|--------|--|-------|--------|---------|--------|
|        |  | 71610 | 100.00 | 5301932 | 100.00 |

# <sup>1</sup>H NMR, <sup>13</sup>C NMR and HPLC of 3b

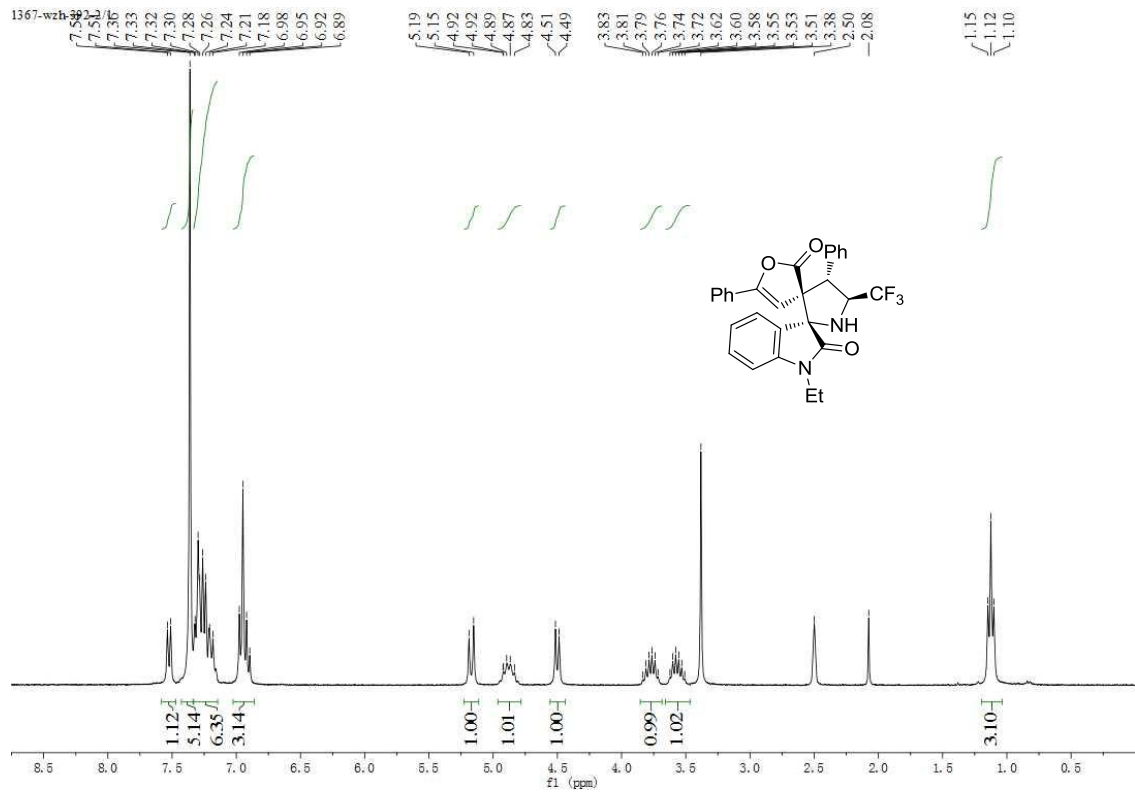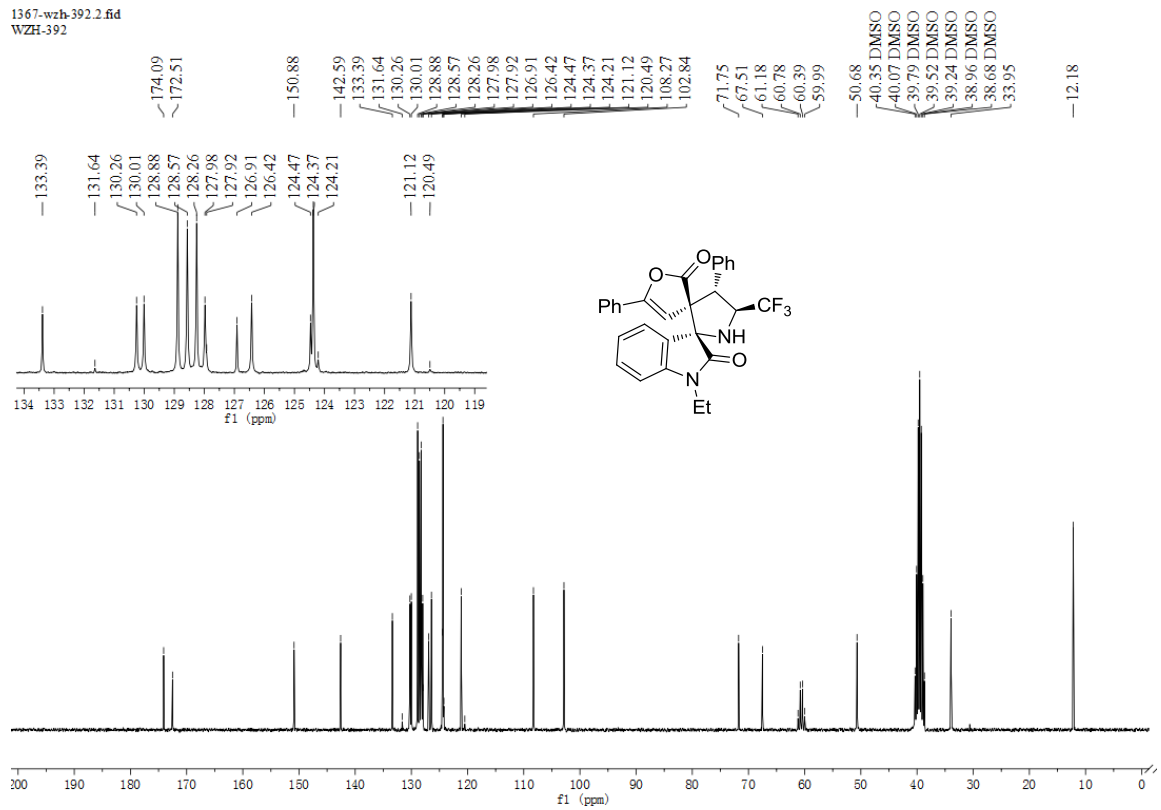

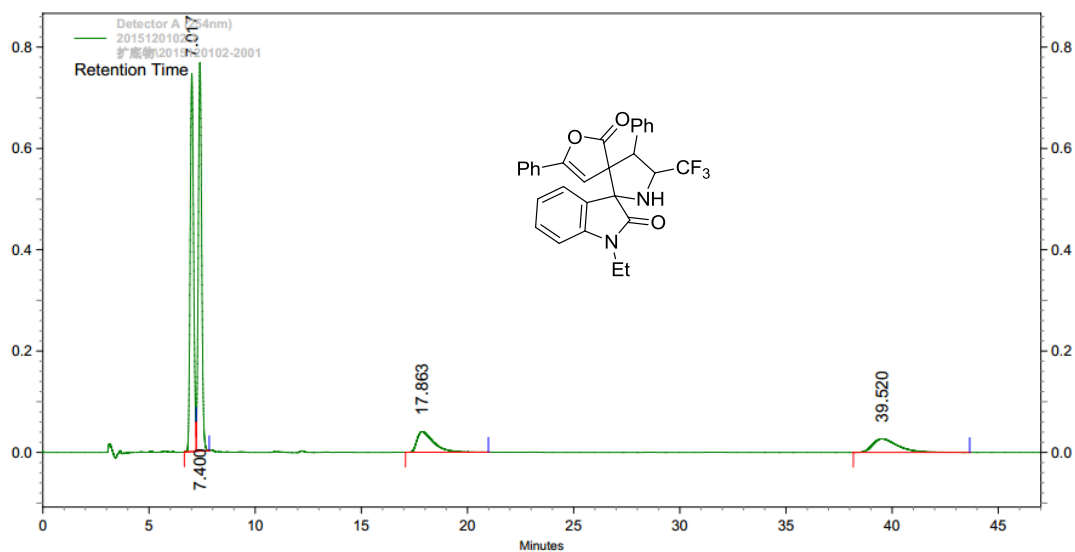

**Detector**

**A**

**(254nm)**

| PK # | Retention Time | Height | Height Percent | Area    | Area Percent |
|------|----------------|--------|----------------|---------|--------------|
| 1    | 7.017          | 745605 | 47.20          | 8272368 | 39.20        |
| 2    | 7.400          | 766480 | 48.52          | 8437496 | 39.98        |
| 3    | 17.863         | 40843  | 2.59           | 2179844 | 10.33        |
| 4    | 39.520         | 26805  | 1.70           | 2214321 | 10.49        |

| Totals |  | 1579733 | 100.00 | 21104029 | 100.00 |
|--------|--|---------|--------|----------|--------|
|--------|--|---------|--------|----------|--------|

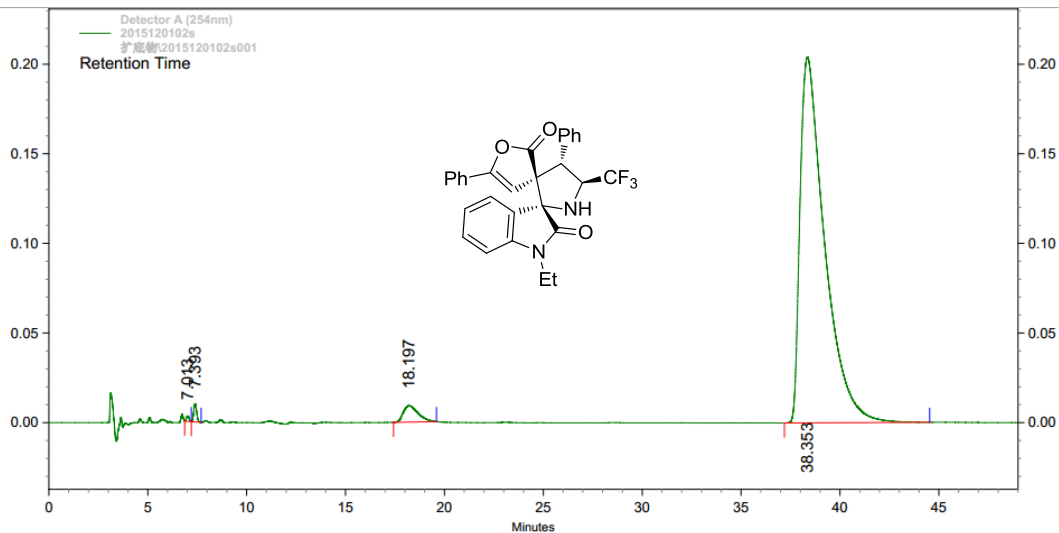

**Detector**

**A**

**(254nm)**

| PK # | Retention Time | Height | Height Percent | Area     | Area Percent |
|------|----------------|--------|----------------|----------|--------------|
| 1    | 7.013          | 2988   | 1.32           | 27474    | 0.15         |
| 2    | 7.393          | 10181  | 4.50           | 105154   | 0.58         |
| 3    | 18.197         | 9144   | 4.04           | 470779   | 2.59         |
| 4    | 38.353         | 204135 | 90.15          | 17602826 | 96.69        |

| Totals |  | 226448 | 100.00 | 18206233 | 100.00 |
|--------|--|--------|--------|----------|--------|
|--------|--|--------|--------|----------|--------|

# <sup>1</sup>H NMR, <sup>13</sup>C NMR and HPLC of 3c

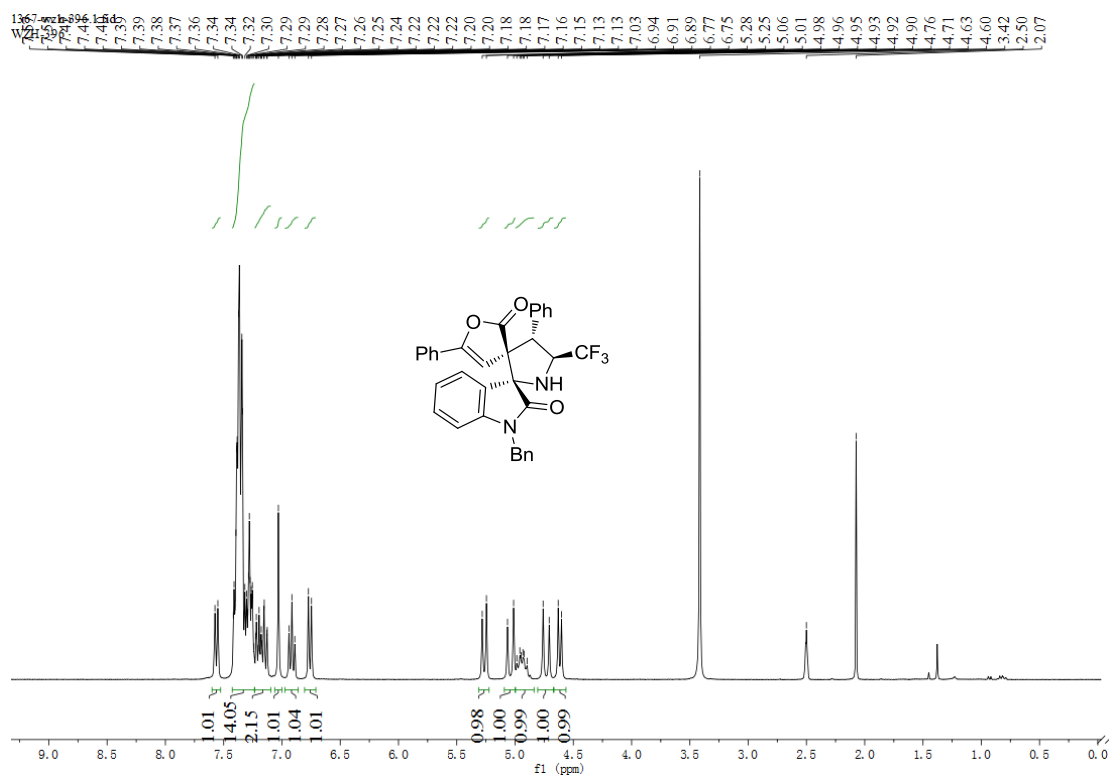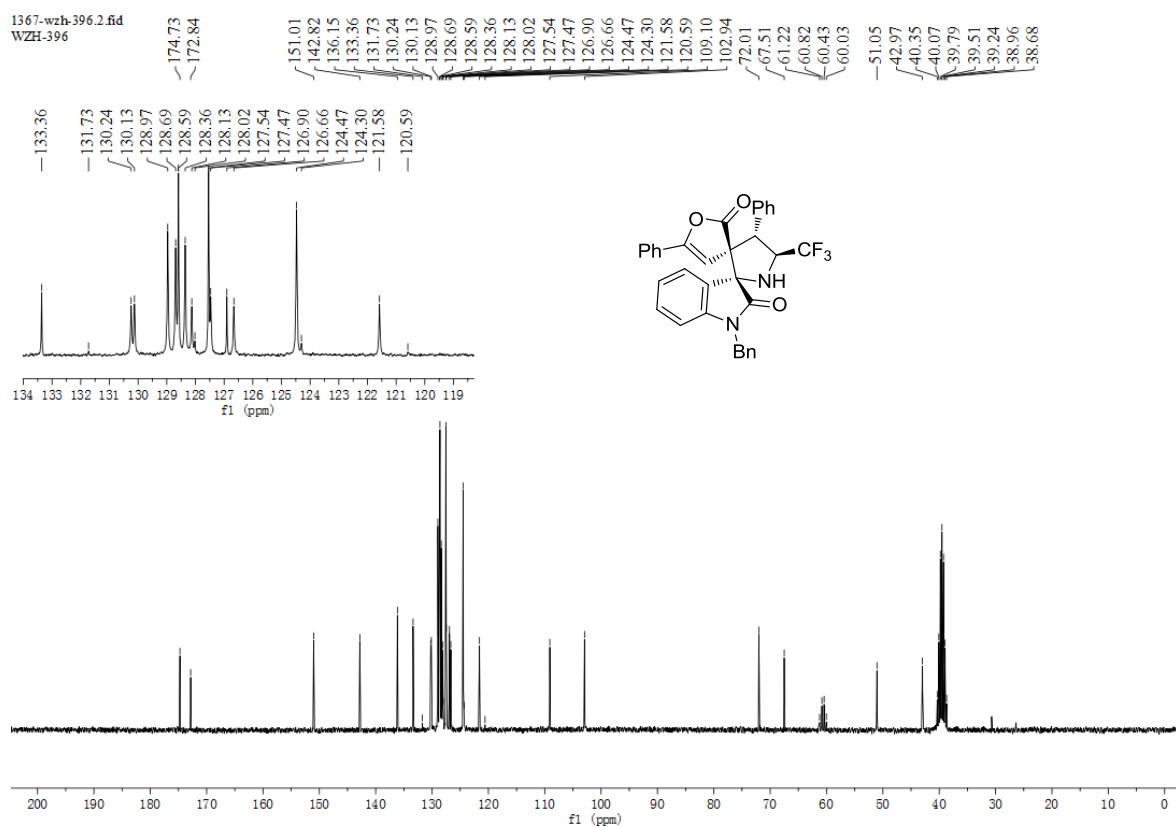



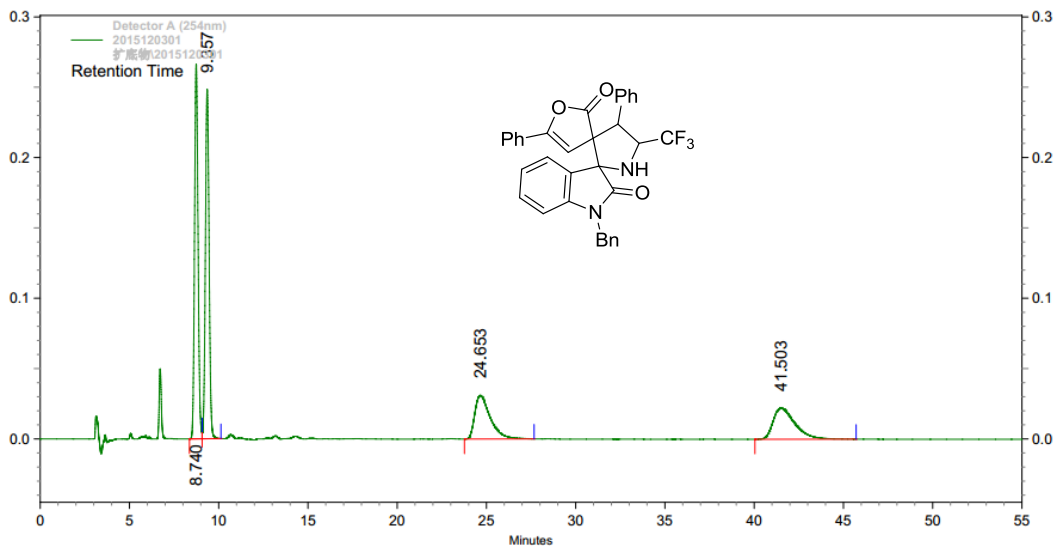

Detector  
A  
(254nm)

| Pk # | Retention Time | Height | Height Percent | Area    | Area Percent |
|------|----------------|--------|----------------|---------|--------------|
| 1    | 8.740          | 266406 | 46.89          | 3623056 | 33.21        |
| 2    | 9.357          | 248421 | 43.72          | 3545098 | 32.50        |
| 3    | 24.653         | 31058  | 5.47           | 1868820 | 17.13        |
| 4    | 41.503         | 22282  | 3.92           | 1871425 | 17.16        |

| Totals |  | 568167 | 100.00 | 10908399 | 100.00 |
|--------|--|--------|--------|----------|--------|
|--------|--|--------|--------|----------|--------|

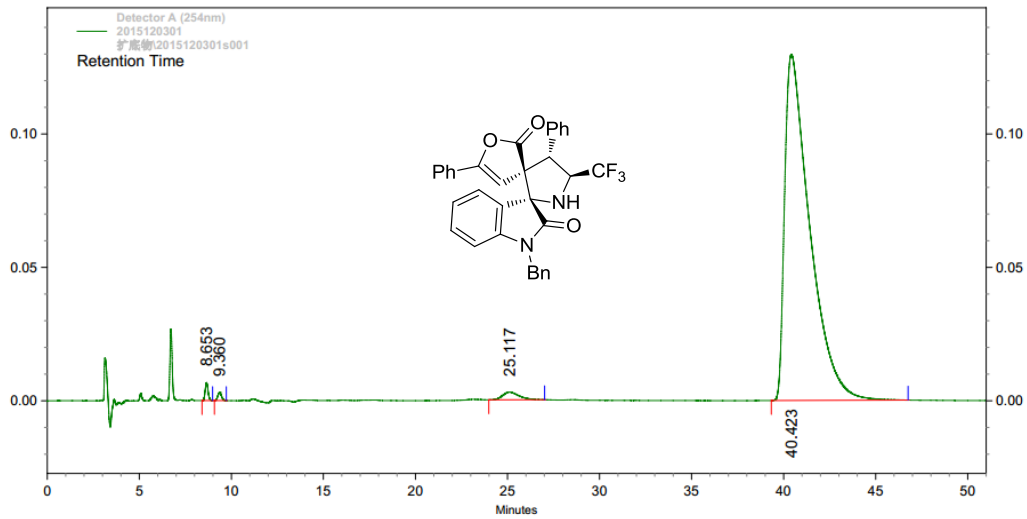

Detector  
A  
(254nm)

| Pk # | Retention Time | Height | Height Percent | Area     | Area Percent |
|------|----------------|--------|----------------|----------|--------------|
| 1    | 8.653          | 6726   | 4.72           | 73914    | 0.59         |
| 2    | 9.360          | 3050   | 2.14           | 43077    | 0.34         |
| 3    | 25.117         | 2857   | 2.01           | 178417   | 1.42         |
| 4    | 40.423         | 129752 | 91.13          | 12296992 | 97.65        |

| Totals |  | 142385 | 100.00 | 12592400 | 100.00 |
|--------|--|--------|--------|----------|--------|
|--------|--|--------|--------|----------|--------|

# <sup>1</sup>H NMR, <sup>13</sup>C NMR and HPLC of 3d

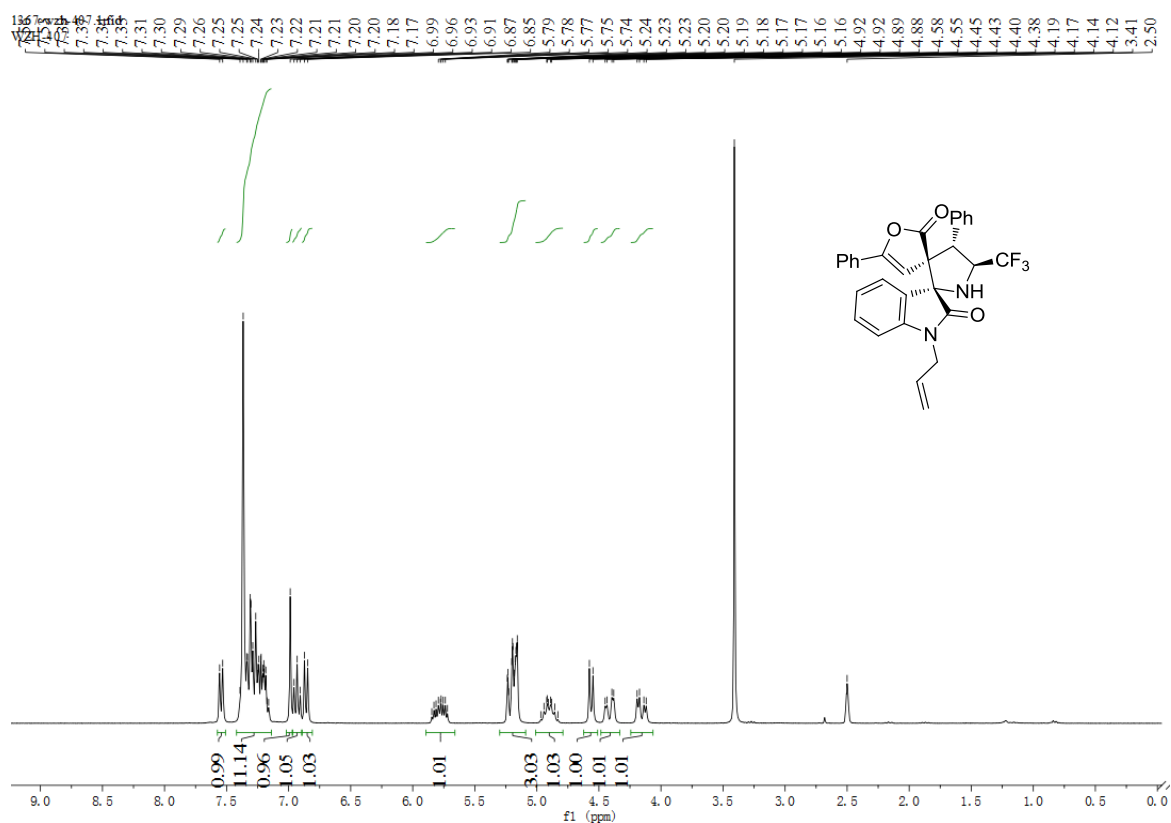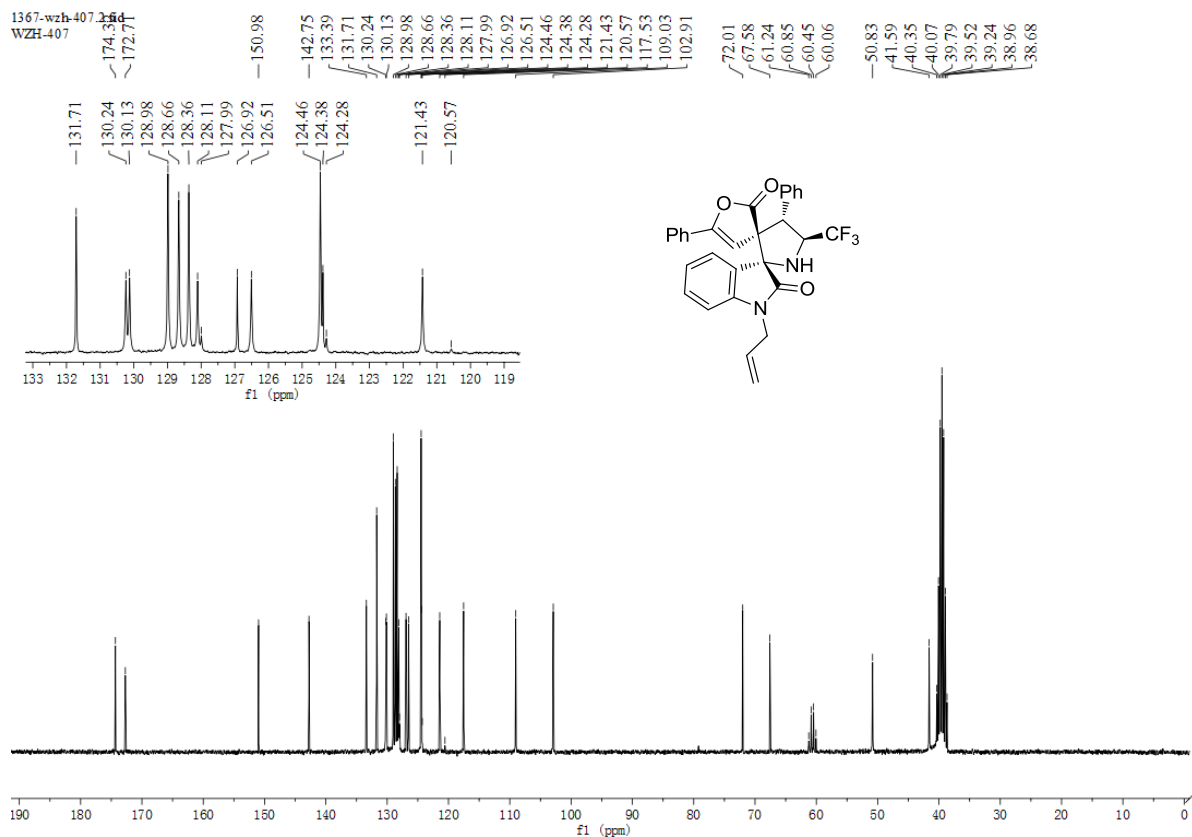

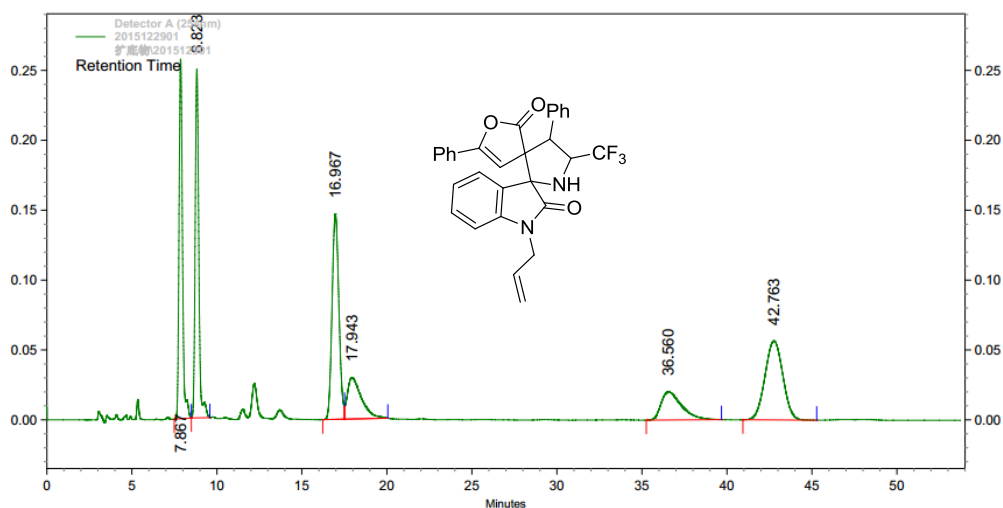

Detector  
A  
(254nm)

| Pk # | Retention Time | Height | Height Percent | Area    | Area Percent |
|------|----------------|--------|----------------|---------|--------------|
| 1    | 7.867          | 257178 | 33.82          | 3611404 | 19.10        |
| 2    | 8.823          | 249587 | 32.82          | 3671934 | 19.42        |
| 3    | 16.967         | 146954 | 19.33          | 4118620 | 21.79        |
| 4    | 17.943         | 29820  | 3.92           | 1697848 | 8.98         |
| 5    | 36.560         | 20202  | 2.66           | 1676837 | 8.87         |
| 6    | 42.763         | 56631  | 7.45           | 4127015 | 21.83        |

|        |  |        |        |          |        |
|--------|--|--------|--------|----------|--------|
| Totals |  | 760372 | 100.00 | 18903658 | 100.00 |
|--------|--|--------|--------|----------|--------|

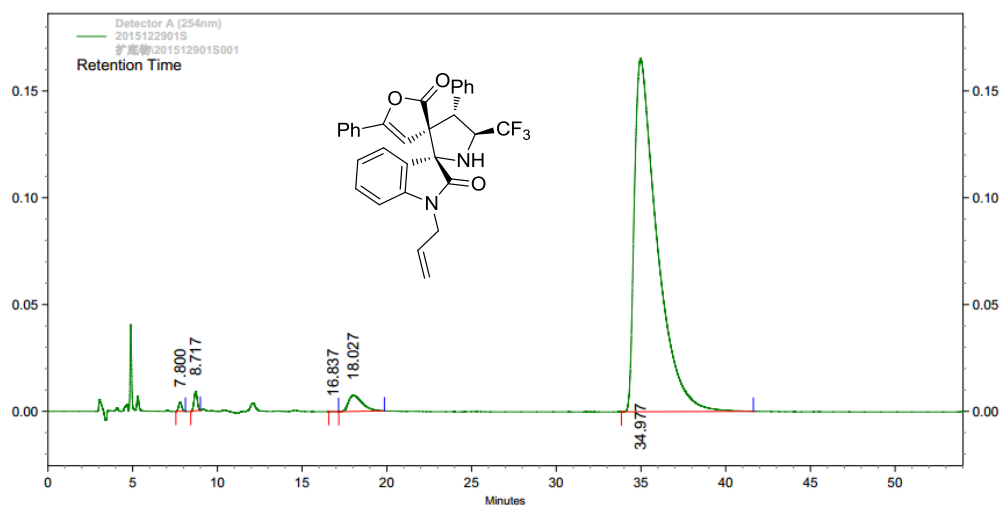

Detector  
A  
(254nm)

| Pk # | Retention Time | Height | Height Percent | Area     | Area Percent |
|------|----------------|--------|----------------|----------|--------------|
| 1    | 7.800          | 4301   | 2.31           | 55370    | 0.35         |
| 2    | 8.717          | 9047   | 4.86           | 119811   | 0.75         |
| 3    | 16.837         | 32     | 0.02           | 596      | 0.00         |
| 4    | 18.027         | 7590   | 4.08           | 422661   | 2.66         |
| 5    | 34.977         | 165266 | 88.74          | 15320082 | 96.24        |

|        |  |        |        |          |        |
|--------|--|--------|--------|----------|--------|
| Totals |  | 186236 | 100.00 | 15918520 | 100.00 |
|--------|--|--------|--------|----------|--------|

# <sup>1</sup>H NMR, <sup>13</sup>C NMR and HPLC of 3e

1367-wzh-395.1.fid  
WZH-395

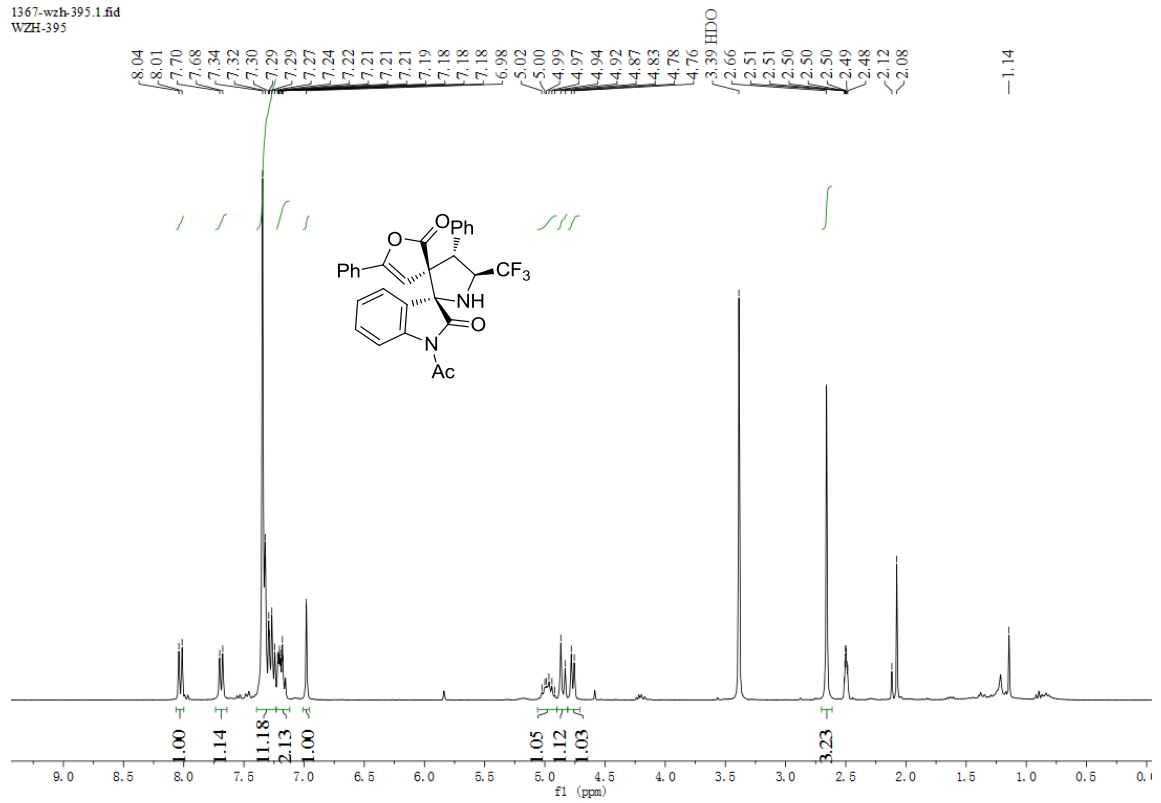

1367-wzh-395.2.fid  
WZH-395

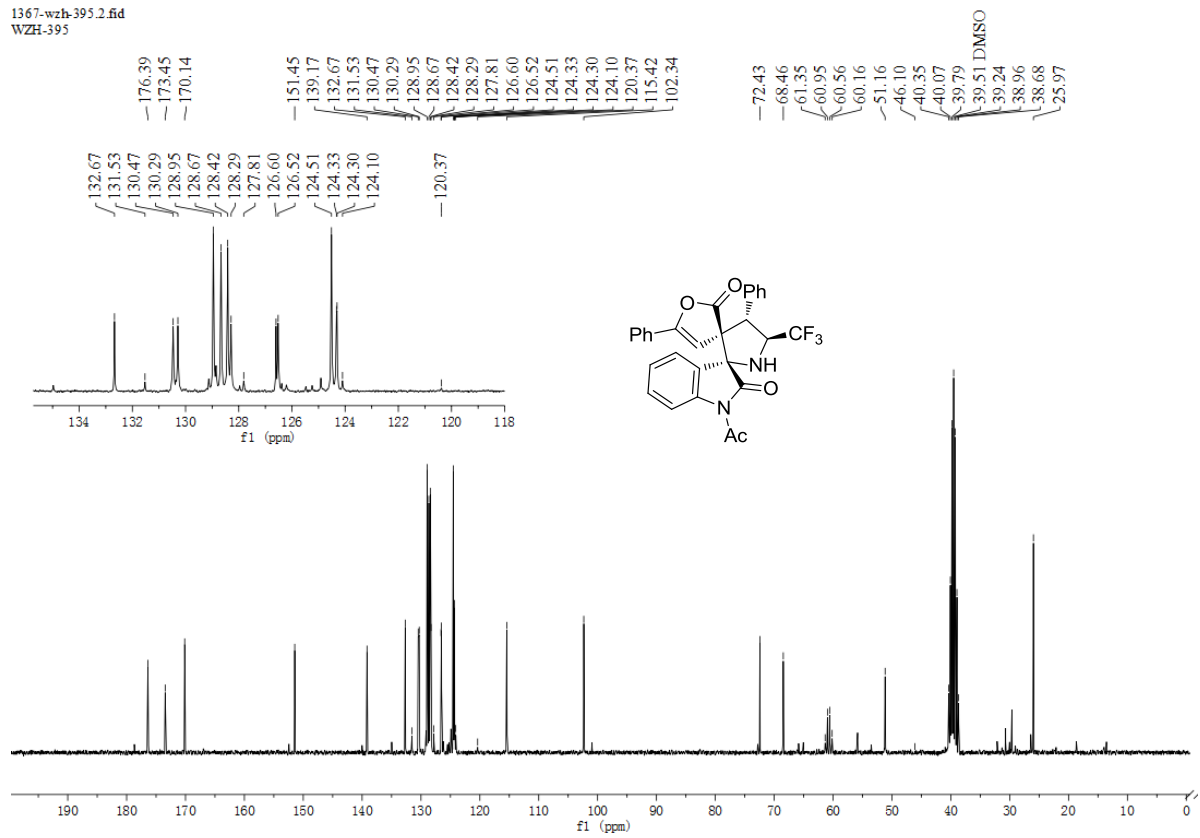

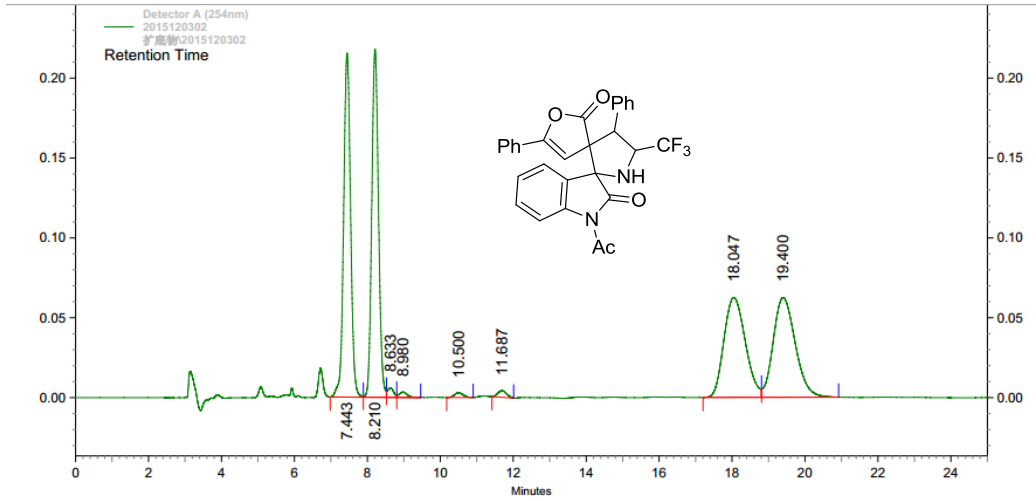

Detector  
A  
(254nm)

| PK # | Retention Time | Height | Height Percent | Area    | Area Percent |
|------|----------------|--------|----------------|---------|--------------|
| 1    | 7.443          | 215216 | 37.47          | 2849739 | 25.84        |
| 2    | 8.210          | 217839 | 37.93          | 2782201 | 25.22        |
| 3    | 8.633          | 5952   | 1.04           | 67687   | 0.61         |
| 4    | 8.980          | 3326   | 0.58           | 49604   | 0.45         |
| 5    | 10.500         | 2994   | 0.52           | 48511   | 0.44         |
| 6    | 11.687         | 4124   | 0.72           | 68370   | 0.62         |
| 7    | 18.047         | 62432  | 10.87          | 2543479 | 23.06        |
| 8    | 19.400         | 62439  | 10.87          | 2620056 | 23.75        |

| Totals |  | 574322 | 100.00 | 11029647 | 100.00 |
|--------|--|--------|--------|----------|--------|
|--------|--|--------|--------|----------|--------|

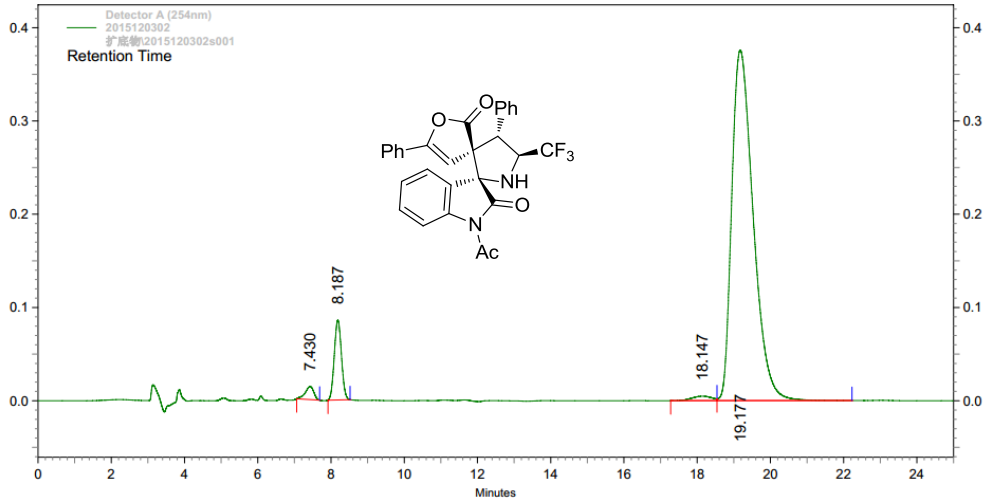

Detector  
A  
(254nm)

| PK # | Retention Time | Height | Height Percent | Area     | Area Percent |
|------|----------------|--------|----------------|----------|--------------|
| 1    | 7.430          | 14019  | 2.92           | 229015   | 1.36         |
| 2    | 8.187          | 85583  | 17.82          | 1162895  | 6.91         |
| 3    | 18.147         | 4823   | 1.00           | 180488   | 1.07         |
| 4    | 19.177         | 375960 | 78.26          | 15267866 | 90.66        |

| Totals |  | 480385 | 100.00 | 16840264 | 100.00 |
|--------|--|--------|--------|----------|--------|
|--------|--|--------|--------|----------|--------|

# <sup>1</sup>H NMR, <sup>13</sup>C NMR and HPLC of 3f

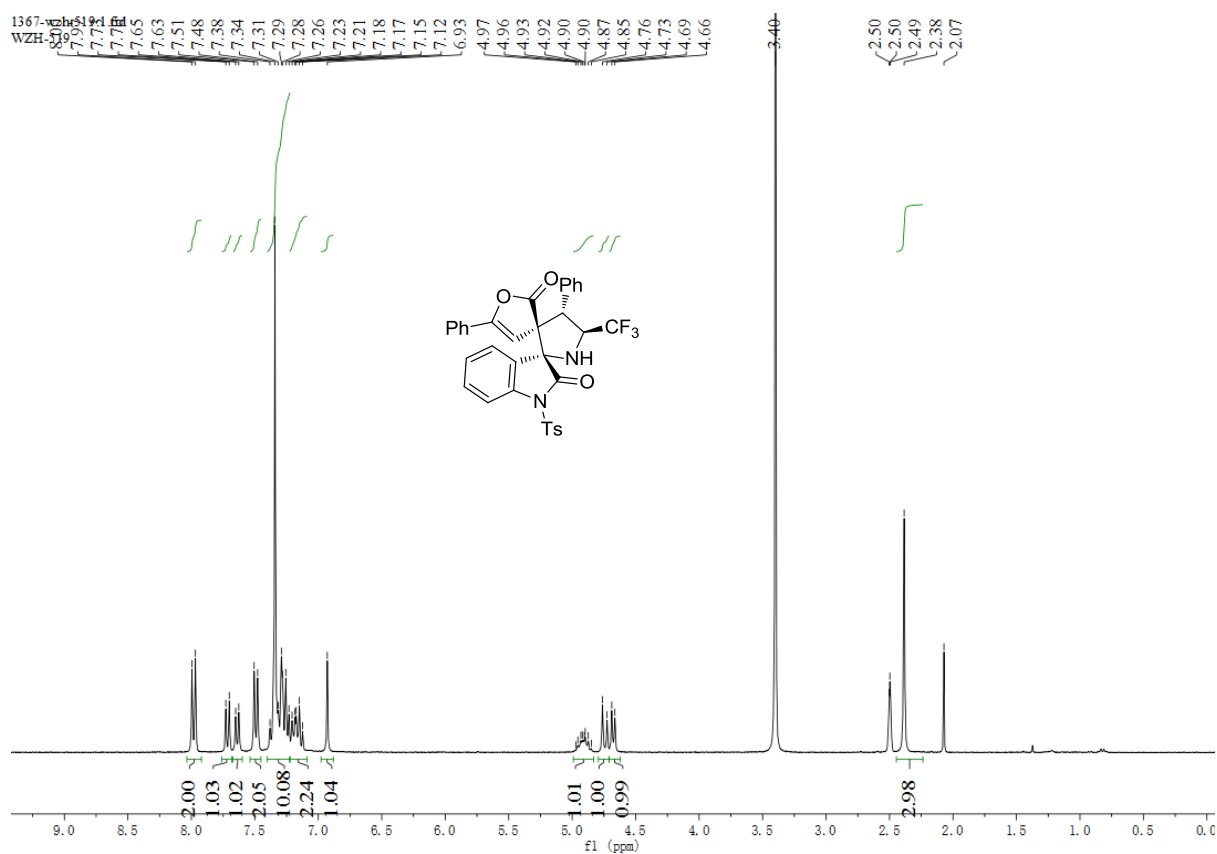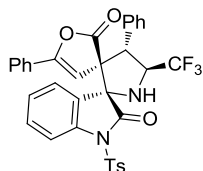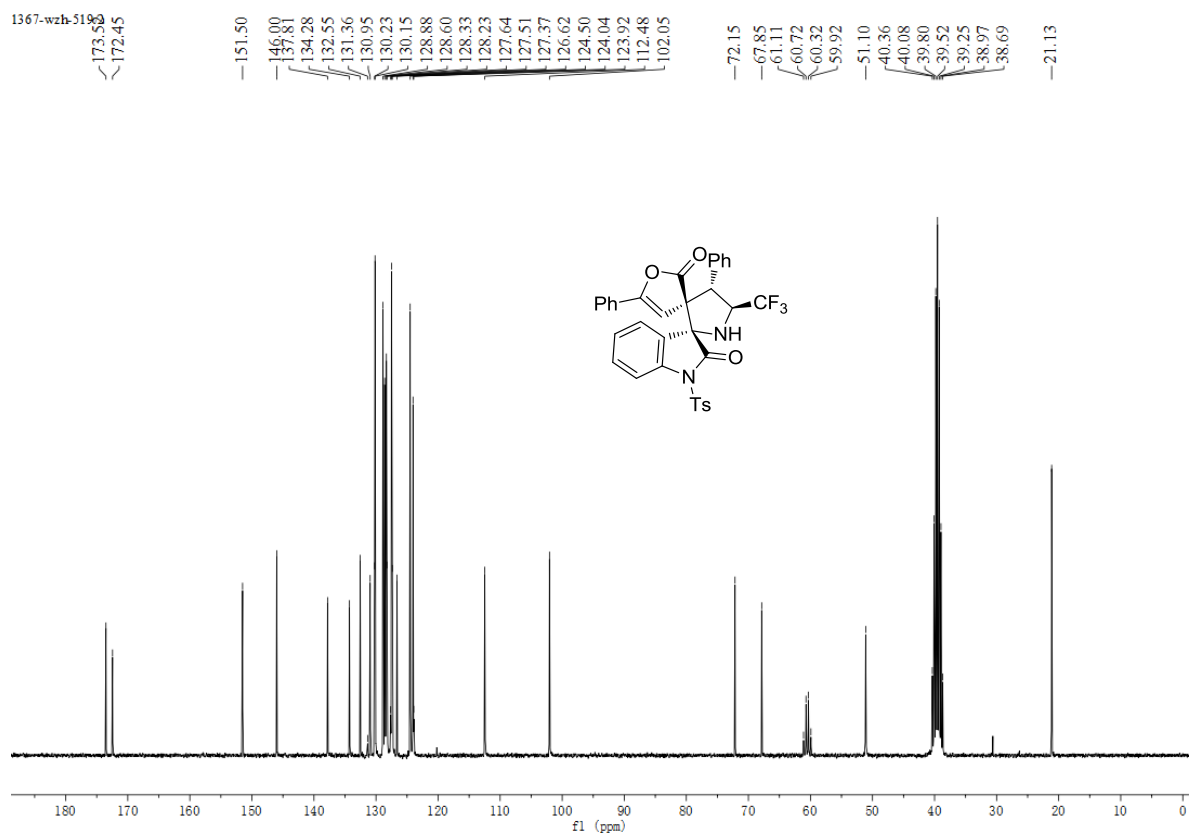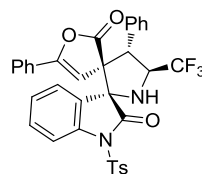

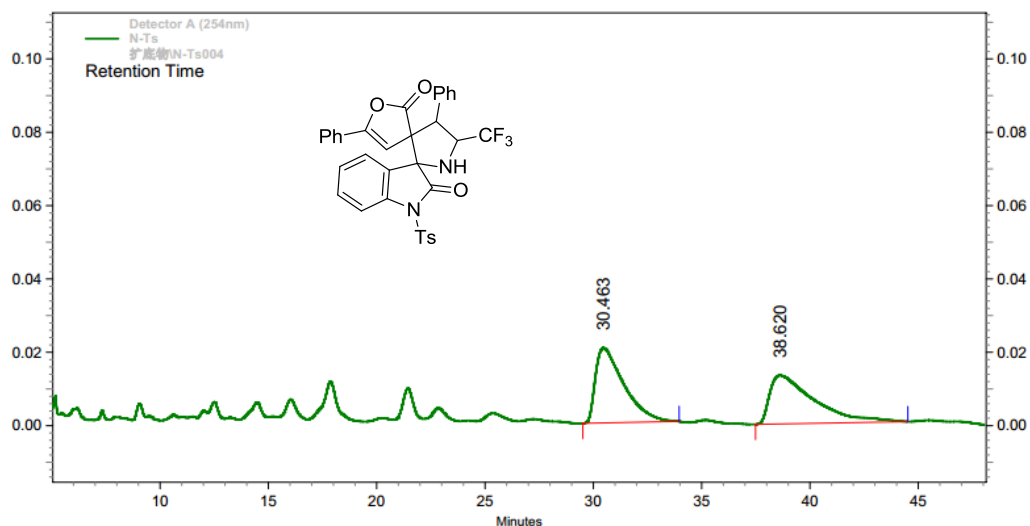

| Detector A (254nm) | Pk # | Retention Time | Height | Height Percent | Area    | Area Percent |
|--------------------|------|----------------|--------|----------------|---------|--------------|
|                    | 1    | 30.463         | 20468  | 60.72          | 1864131 | 49.85        |
|                    | 2    | 38.620         | 13242  | 39.28          | 1875243 | 50.15        |

| Totals |  |  |       |        |         |        |
|--------|--|--|-------|--------|---------|--------|
|        |  |  | 33710 | 100.00 | 3739374 | 100.00 |

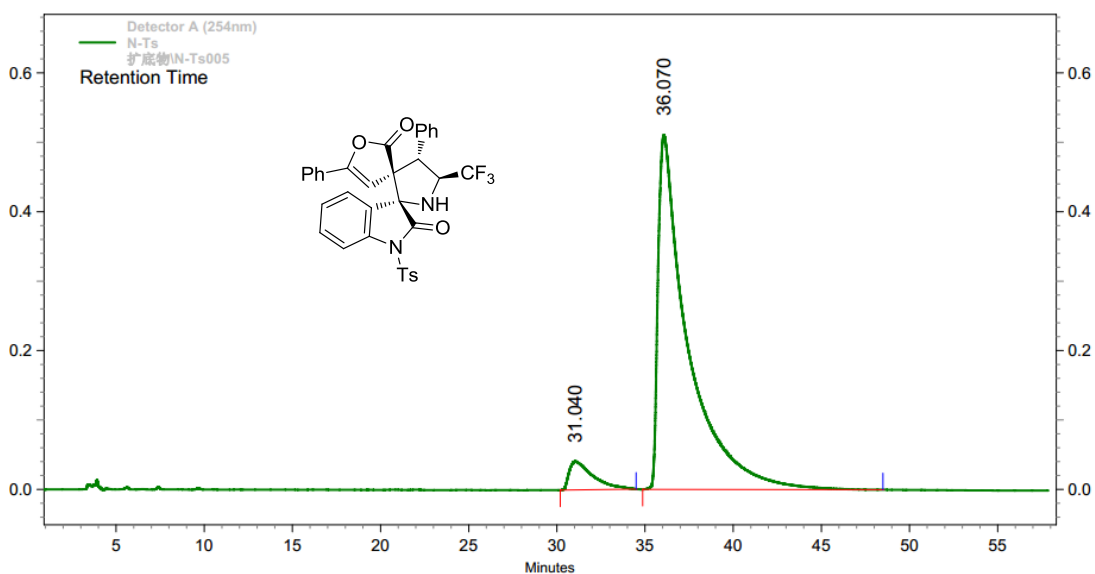

| Detector A (254nm) | Pk # | Retention Time | Height | Height Percent | Area     | Area Percent |
|--------------------|------|----------------|--------|----------------|----------|--------------|
|                    | 1    | 31.040         | 41147  | 7.46           | 3826010  | 6.02         |
|                    | 2    | 36.070         | 510556 | 92.54          | 59700004 | 93.98        |

| Totals |  |  |        |        |          |        |
|--------|--|--|--------|--------|----------|--------|
|        |  |  | 551703 | 100.00 | 63526014 | 100.00 |

# <sup>1</sup>H NMR, <sup>13</sup>C NMR and HPLC of 3g

1367-wzh-391.1.fid  
WZH-391

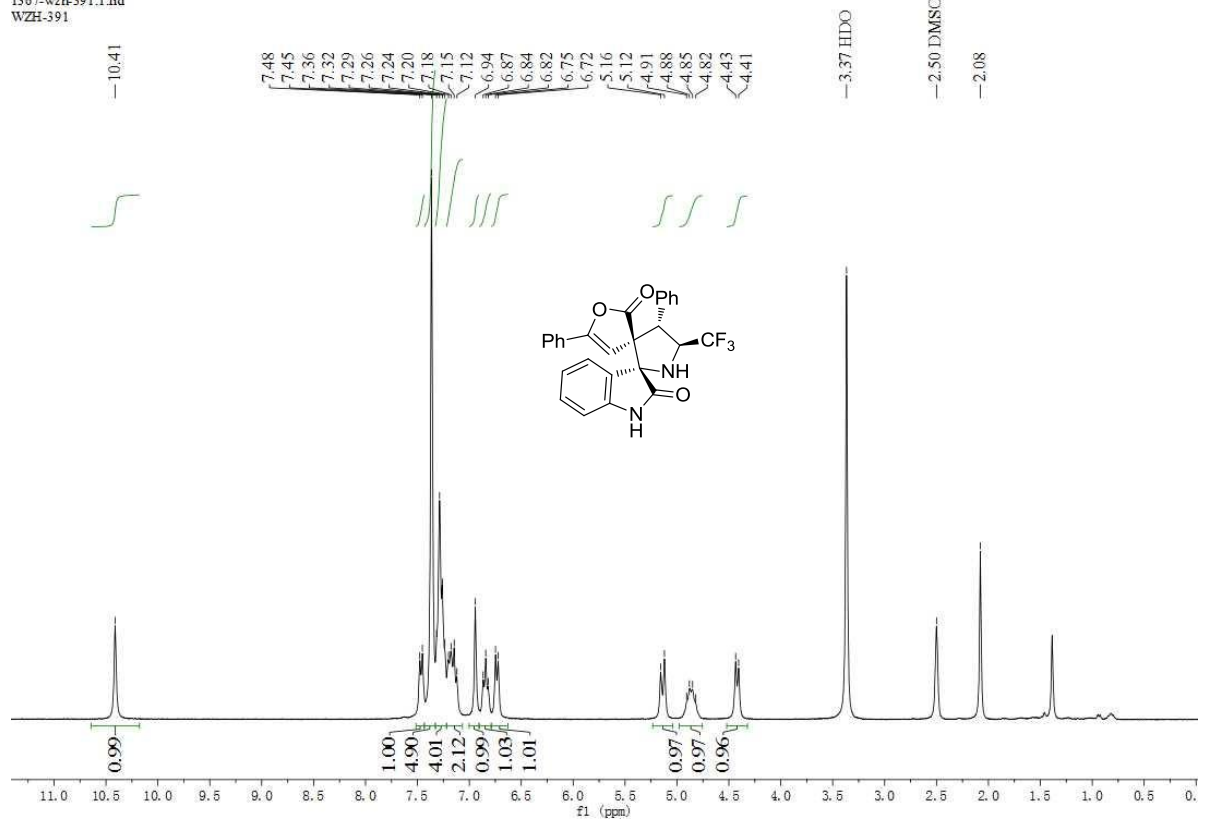

1367-wzh-391.2.fid  
WZH-391 13C

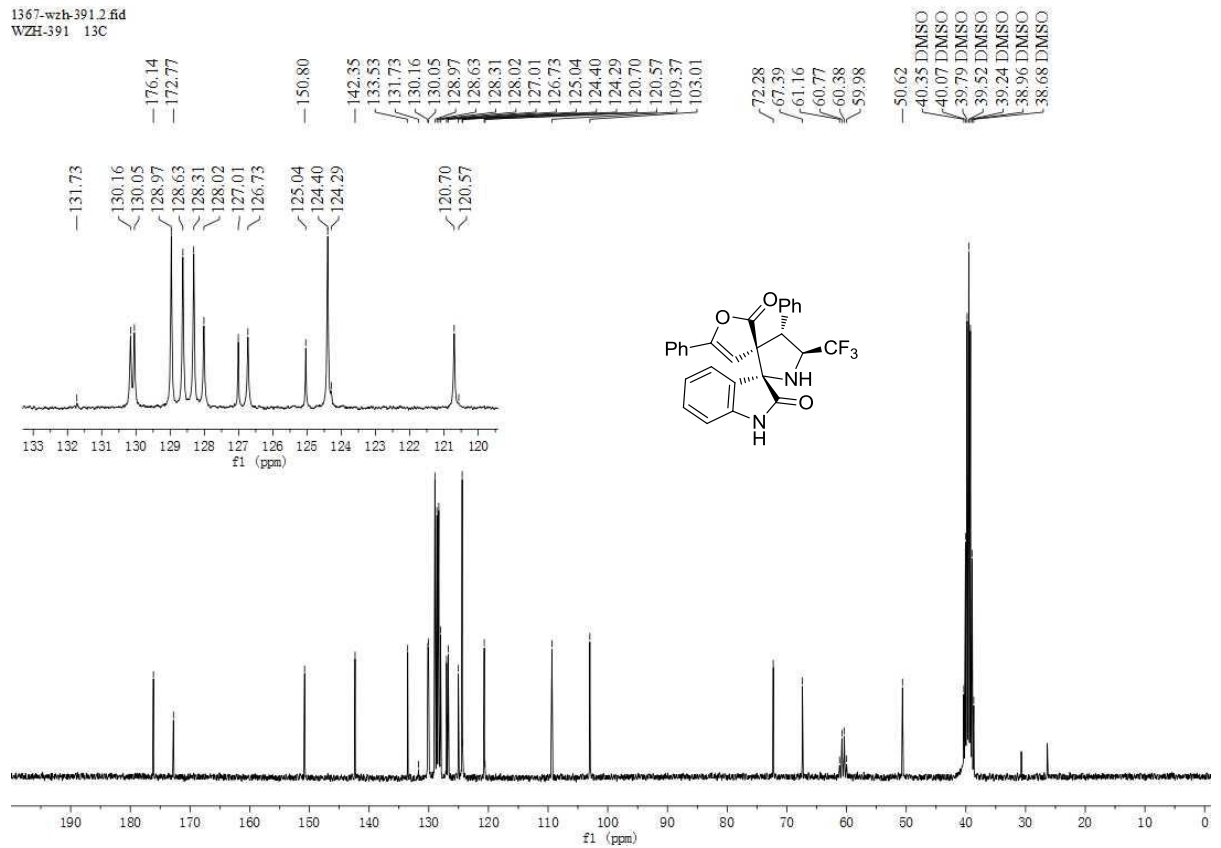



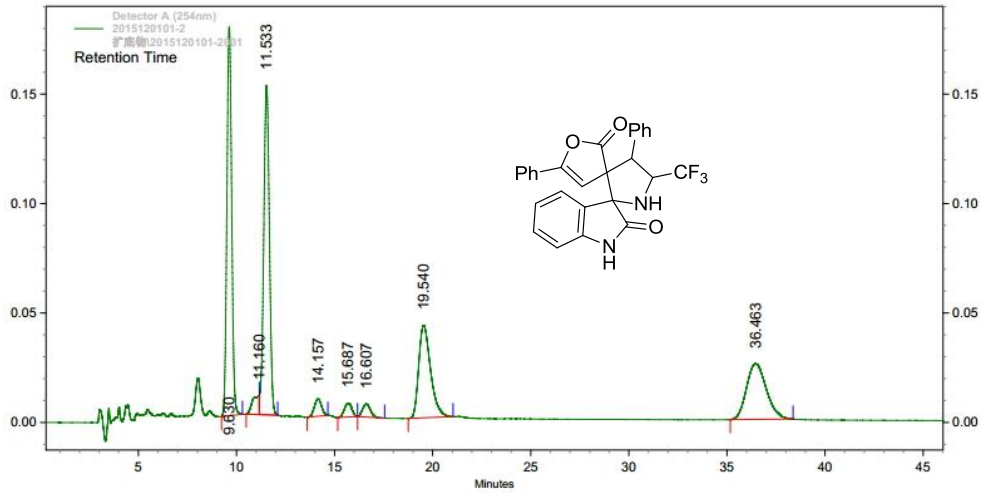

Detector  
A  
(254nm)

| Pk # | Retention Time | Height | Height Percent | Area    | Area Percent |
|------|----------------|--------|----------------|---------|--------------|
| 1    | 9.630          | 177384 | 41.76          | 3000456 | 29.08        |
| 2    | 11.160         | 8711   | 2.05           | 207236  | 2.01         |
| 3    | 11.533         | 150528 | 35.44          | 3020504 | 29.27        |
| 4    | 14.157         | 7958   | 1.87           | 201581  | 1.95         |
| 5    | 15.687         | 6422   | 1.51           | 165828  | 1.61         |
| 6    | 16.607         | 6023   | 1.42           | 165094  | 1.60         |
| 7    | 19.540         | 42282  | 9.95           | 1770008 | 17.15        |
| 8    | 36.463         | 25437  | 5.99           | 1787586 | 17.32        |

| Totals |  | 424745 | 100.00 | 10318293 | 100.00 |
|--------|--|--------|--------|----------|--------|
|--------|--|--------|--------|----------|--------|

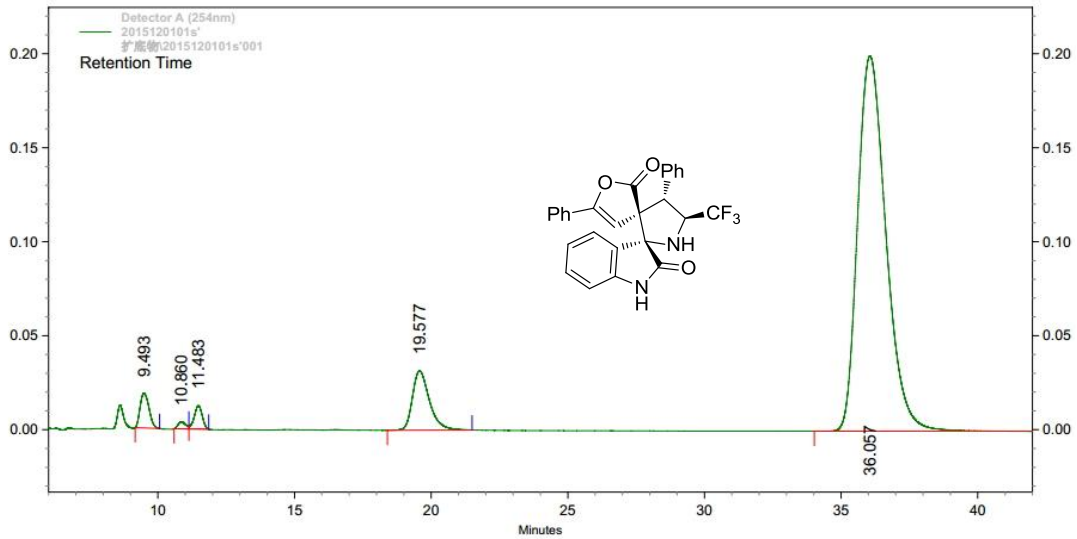

Detector  
A  
(254nm)

| Pk # | Retention Time | Height | Height Percent | Area     | Area Percent |
|------|----------------|--------|----------------|----------|--------------|
| 1    | 9.493          | 18414  | 6.92           | 418207   | 2.54         |
| 2    | 10.860         | 3766   | 1.42           | 72204    | 0.44         |
| 3    | 11.483         | 12416  | 4.67           | 252072   | 1.53         |
| 4    | 19.577         | 31624  | 11.89          | 1364549  | 8.28         |
| 5    | 36.057         | 199696 | 75.10          | 14368842 | 87.21        |

| Totals |  | 265916 | 100.00 | 16475874 | 100.00 |
|--------|--|--------|--------|----------|--------|
|--------|--|--------|--------|----------|--------|

# <sup>1</sup>H NMR, <sup>13</sup>C NMR and HPLC of 3h

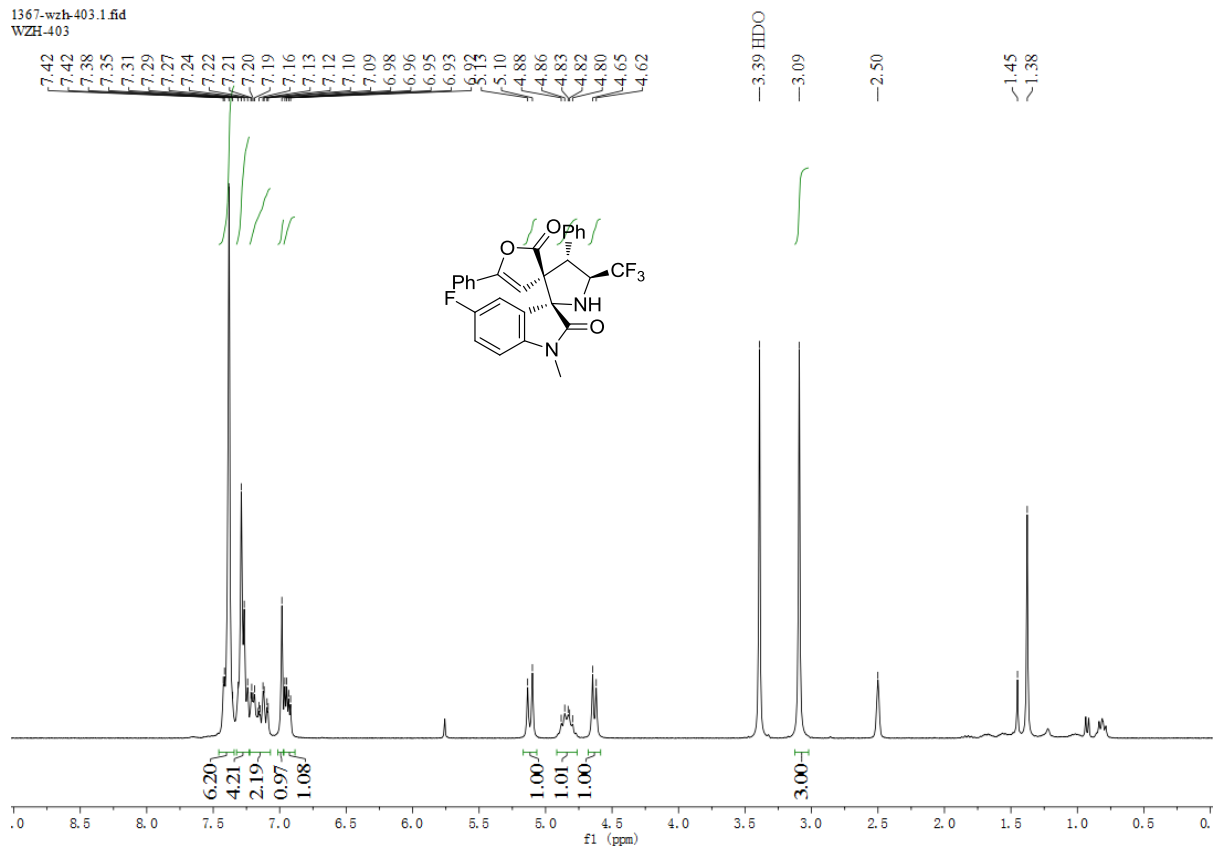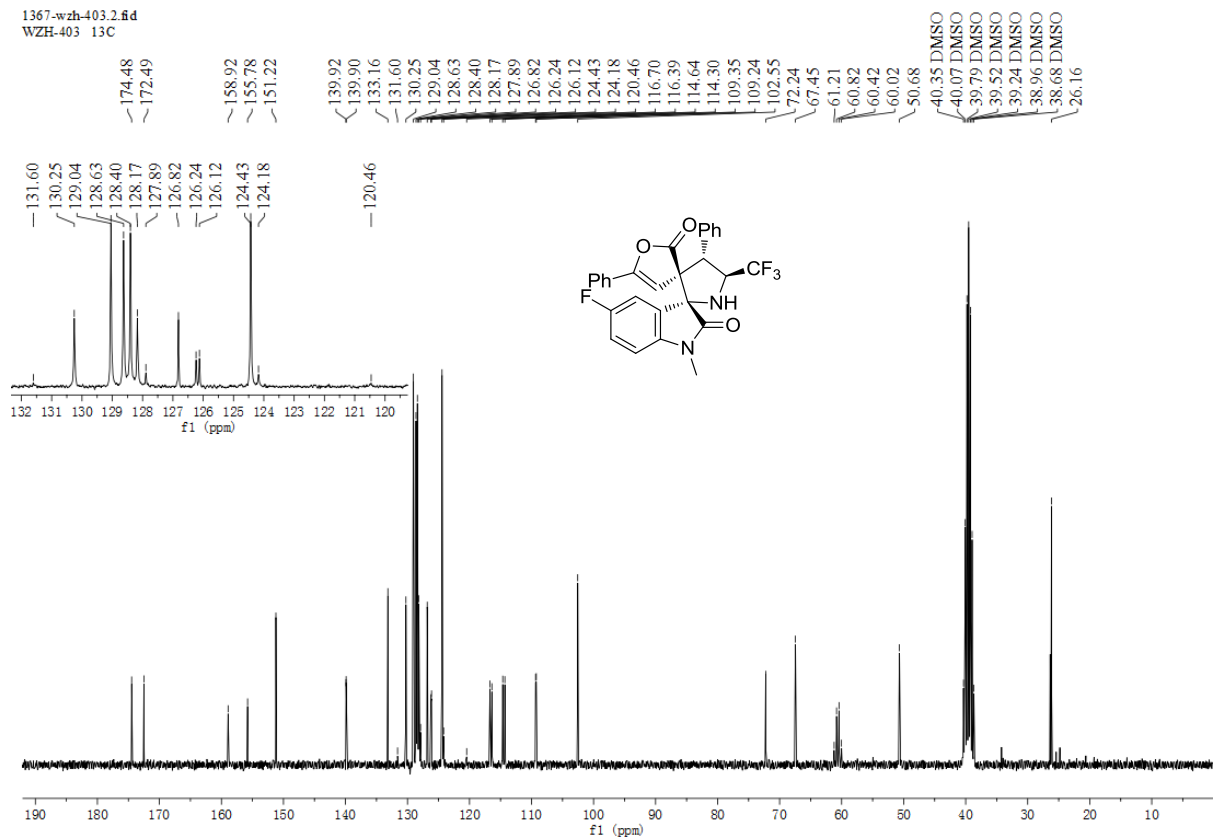

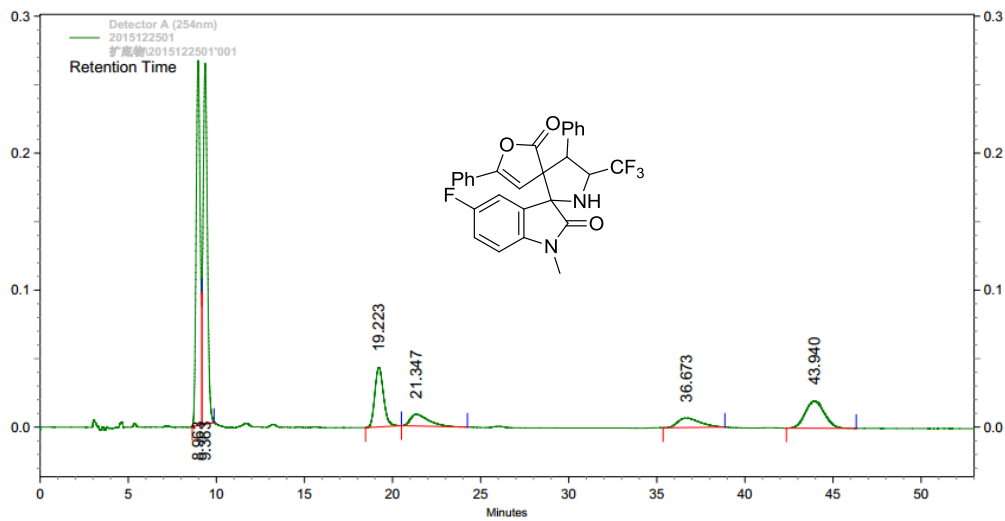

Detector  
A  
(254nm)

| Pk # | Retention Time | Height | Height Percent | Area    | Area Percent |
|------|----------------|--------|----------------|---------|--------------|
| 1    | 8.963          | 266314 | 43.79          | 4238591 | 32.93        |
| 2    | 9.363          | 263132 | 43.27          | 4419339 | 34.33        |
| 3    | 19.223         | 43462  | 7.15           | 1489549 | 11.57        |
| 4    | 21.347         | 8506   | 1.40           | 617197  | 4.79         |
| 5    | 36.673         | 6925   | 1.14           | 611407  | 4.75         |
| 6    | 43.940         | 19814  | 3.26           | 1496369 | 11.62        |

| Totals |  |        |        |          |        |
|--------|--|--------|--------|----------|--------|
|        |  | 608153 | 100.00 | 12872452 | 100.00 |

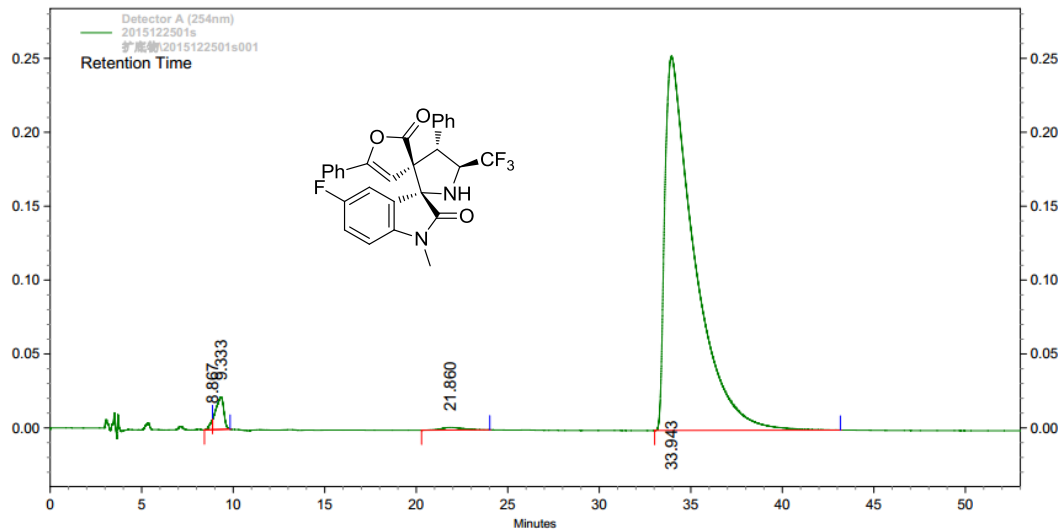

Detector  
A  
(254nm)

| Pk # | Retention Time | Height | Height Percent | Area     | Area Percent |
|------|----------------|--------|----------------|----------|--------------|
| 1    | 8.867          | 6766   | 2.39           | 67682    | 0.23         |
| 2    | 9.333          | 21920  | 7.73           | 659681   | 2.27         |
| 3    | 21.860         | 1755   | 0.62           | 147825   | 0.51         |
| 4    | 33.943         | 253062 | 89.26          | 28198518 | 96.99        |

| Totals |  |        |        |          |        |
|--------|--|--------|--------|----------|--------|
|        |  | 283503 | 100.00 | 29073706 | 100.00 |

# <sup>1</sup>H NMR, <sup>13</sup>C NMR and HPLC of 3i

1367-wzh-397.1.fid  
WZH-397

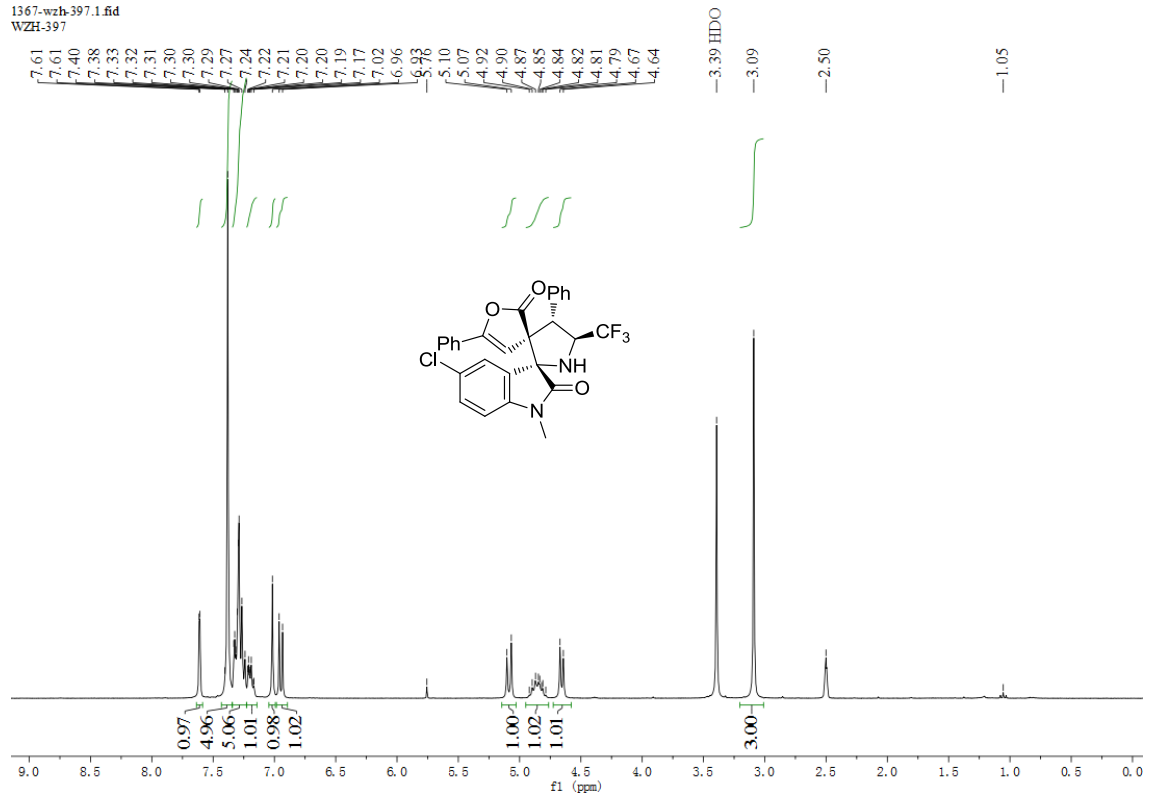

1367-wzh-397.2.fid  
WZH-397

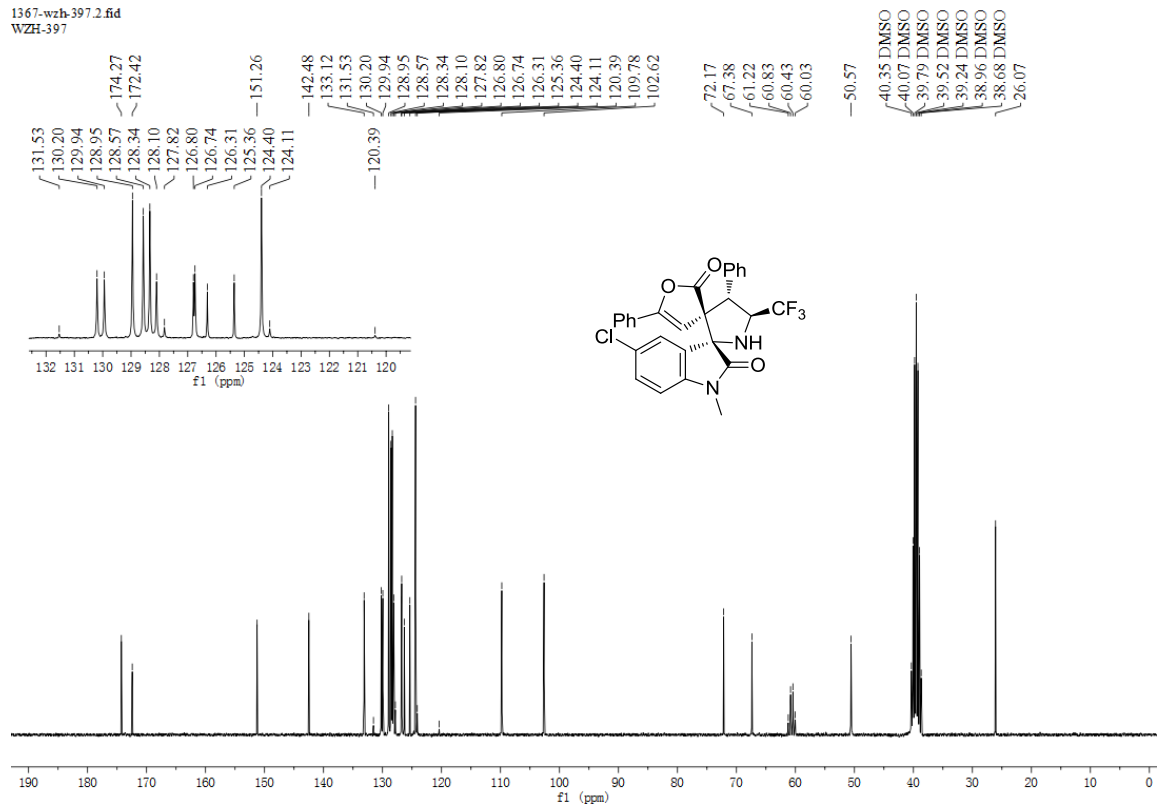

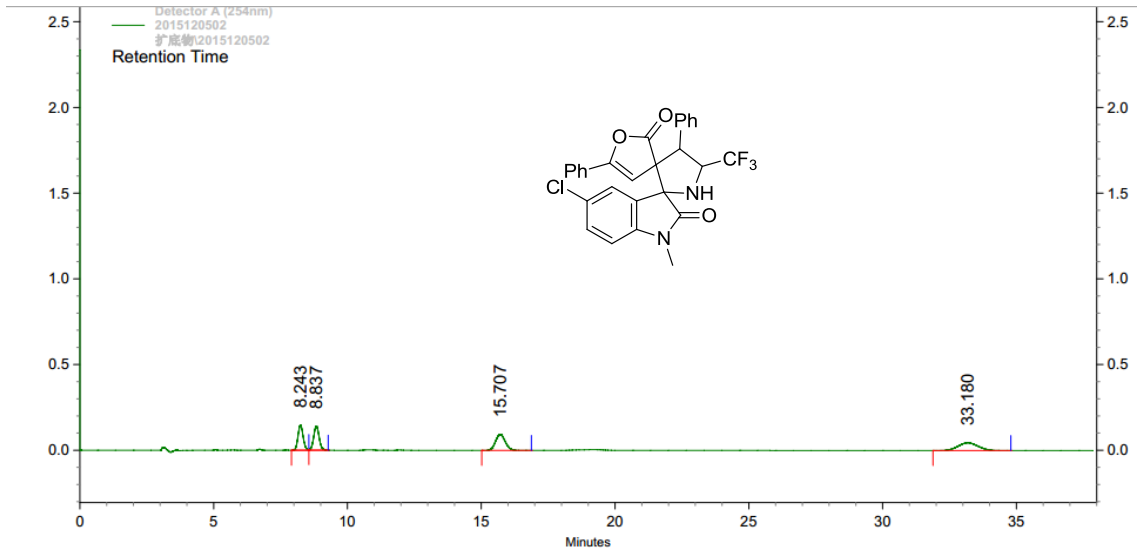

Detector  
A  
(254nm)

| PK # | Retention Time | Height | Height Percent | Area    | Area Percent |
|------|----------------|--------|----------------|---------|--------------|
| 1    | 8.243          | 147133 | 34.55          | 1975587 | 22.70        |
| 2    | 8.837          | 140920 | 33.09          | 2004156 | 23.02        |
| 3    | 15.707         | 92966  | 21.83          | 2358577 | 27.10        |
| 4    | 33.180         | 44857  | 10.53          | 2366024 | 27.18        |

| Totals |  | 425876 | 100.00 | 8704344 | 100.00 |
|--------|--|--------|--------|---------|--------|
|--------|--|--------|--------|---------|--------|

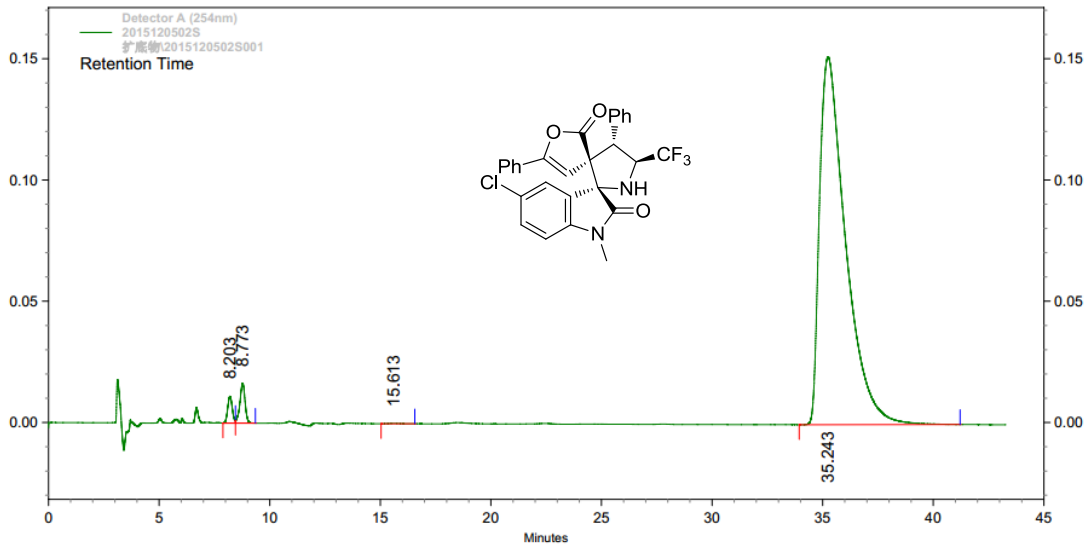

Detector  
A  
(254nm)

| PK # | Retention Time | Height | Height Percent | Area     | Area Percent |
|------|----------------|--------|----------------|----------|--------------|
| 1    | 8.203          | 11053  | 6.16           | 158612   | 1.23         |
| 2    | 8.773          | 16466  | 9.18           | 267321   | 2.08         |
| 3    | 15.613         | 180    | 0.10           | 5916     | 0.05         |
| 4    | 35.243         | 151722 | 84.56          | 12428539 | 96.64        |

| Totals |  | 179421 | 100.00 | 12860388 | 100.00 |
|--------|--|--------|--------|----------|--------|
|--------|--|--------|--------|----------|--------|

# <sup>1</sup>H NMR, <sup>13</sup>C NMR and HPLC of 3j

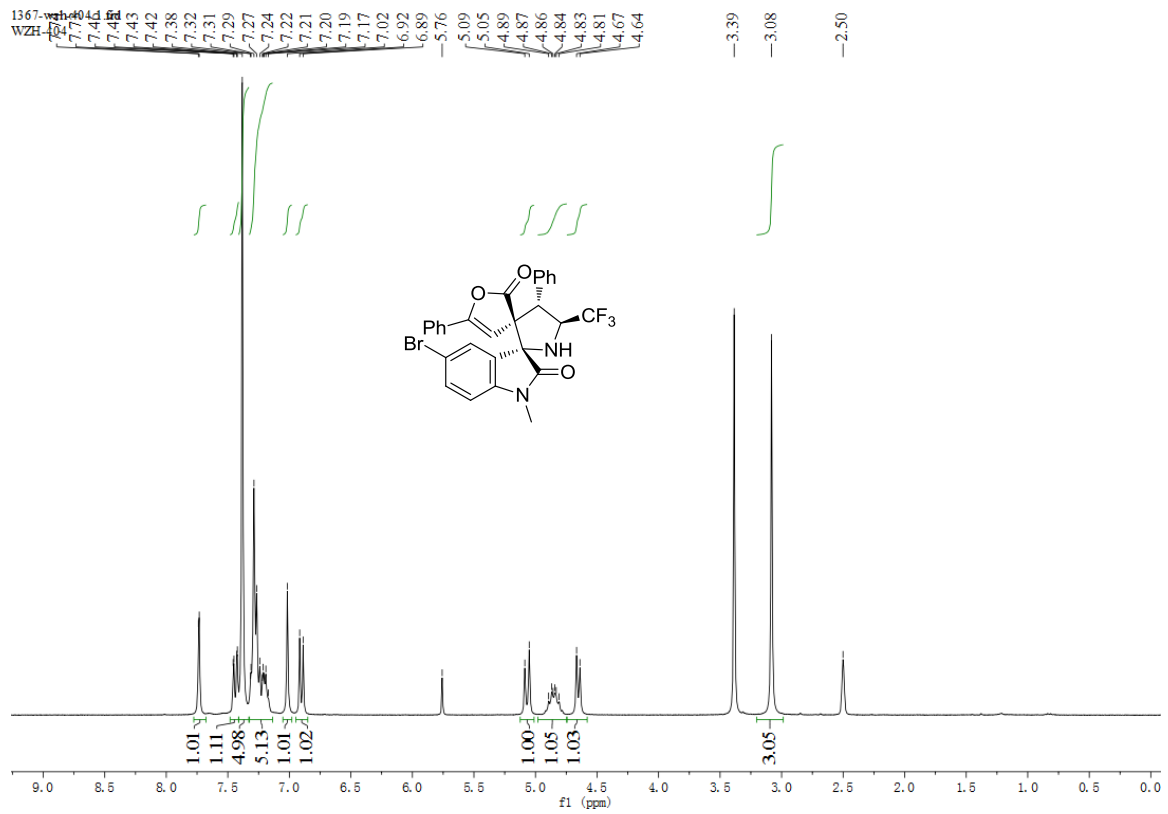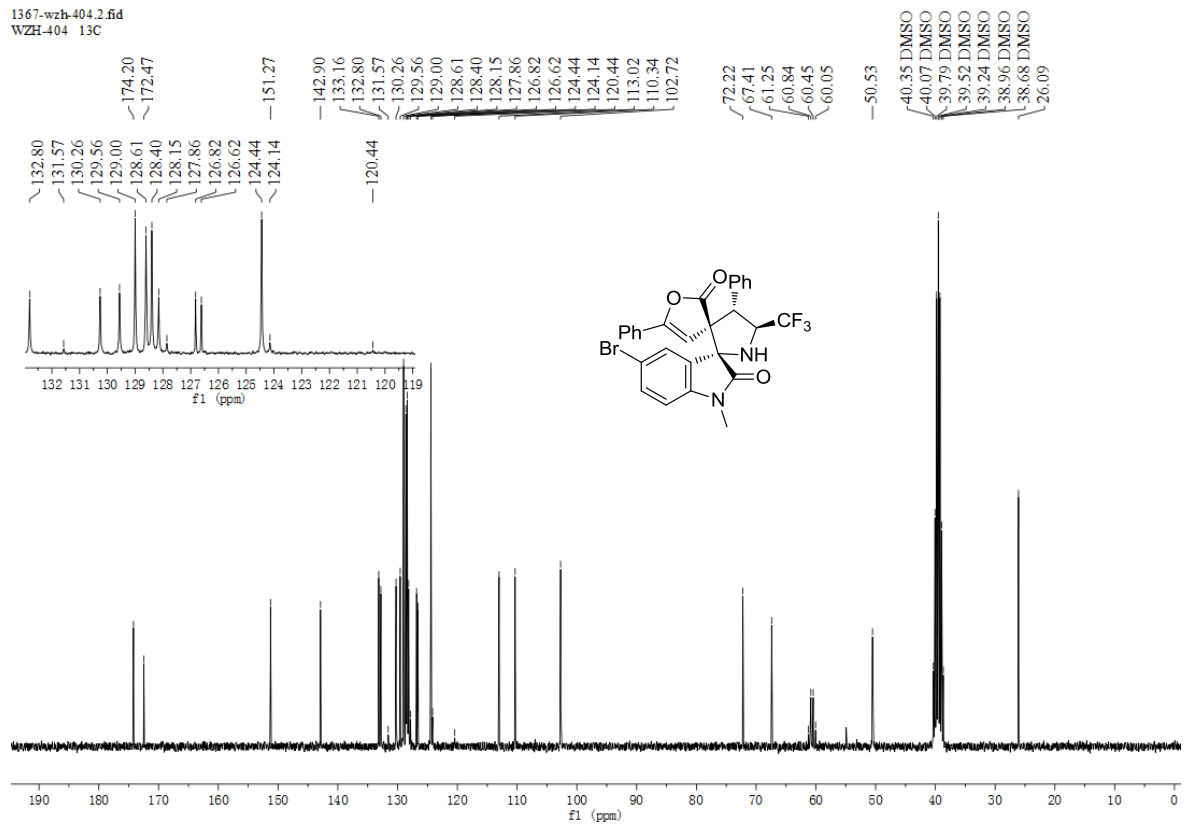

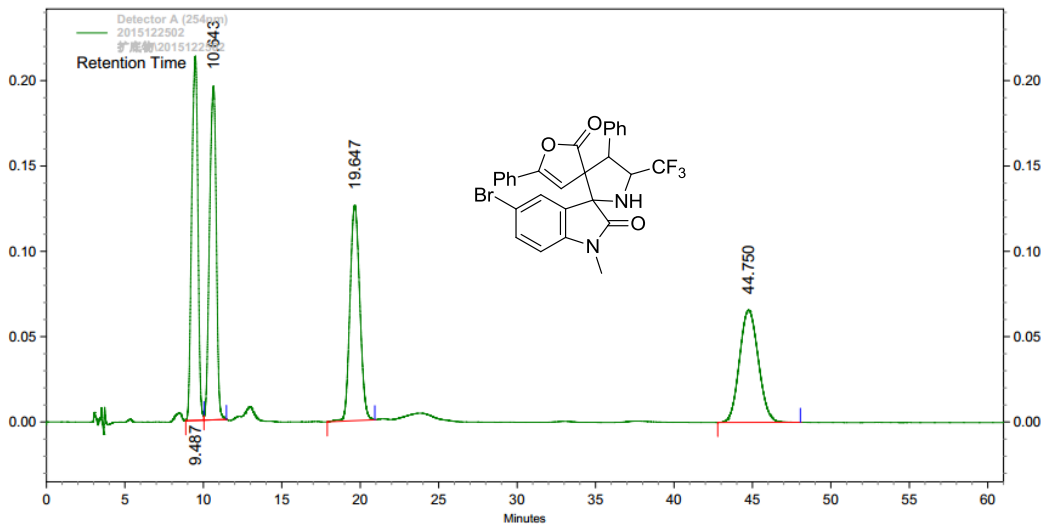

Detector  
A  
(254nm)

| PK # | Retention Time | Height | Height Percent | Area    | Area Percent |
|------|----------------|--------|----------------|---------|--------------|
| 1    | 9.487          | 213353 | 35.52          | 5853233 | 25.79        |
| 2    | 10.643         | 195451 | 32.54          | 5848578 | 25.77        |
| 3    | 19.647         | 126129 | 21.00          | 5494824 | 24.21        |
| 4    | 44.750         | 65807  | 10.95          | 5501387 | 24.24        |

| Totals | Height | Area     | Area Percent |
|--------|--------|----------|--------------|
|        | 600740 | 22698022 | 100.00       |

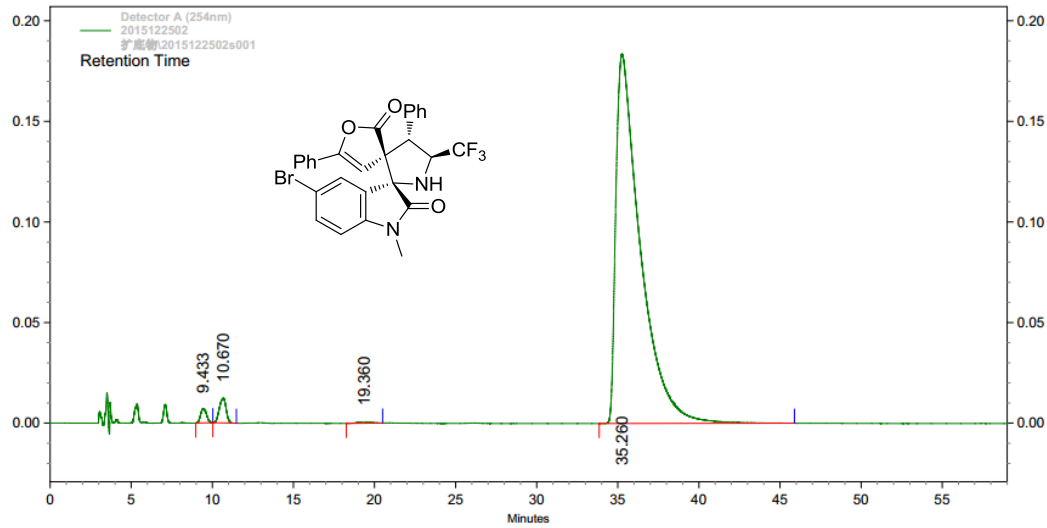

Detector  
A  
(254nm)

| PK # | Retention Time | Height | Height Percent | Area     | Area Percent |
|------|----------------|--------|----------------|----------|--------------|
| 1    | 9.433          | 6968   | 3.43           | 177920   | 0.90         |
| 2    | 10.670         | 12233  | 6.02           | 355022   | 1.80         |
| 3    | 19.360         | 526    | 0.26           | 32525    | 0.16         |
| 4    | 35.260         | 183629 | 90.30          | 19185114 | 97.14        |

| Totals | Height | Area     | Area Percent |
|--------|--------|----------|--------------|
|        | 203356 | 19750581 | 100.00       |

# <sup>1</sup>H NMR, <sup>13</sup>C NMR and HPLC of 3k

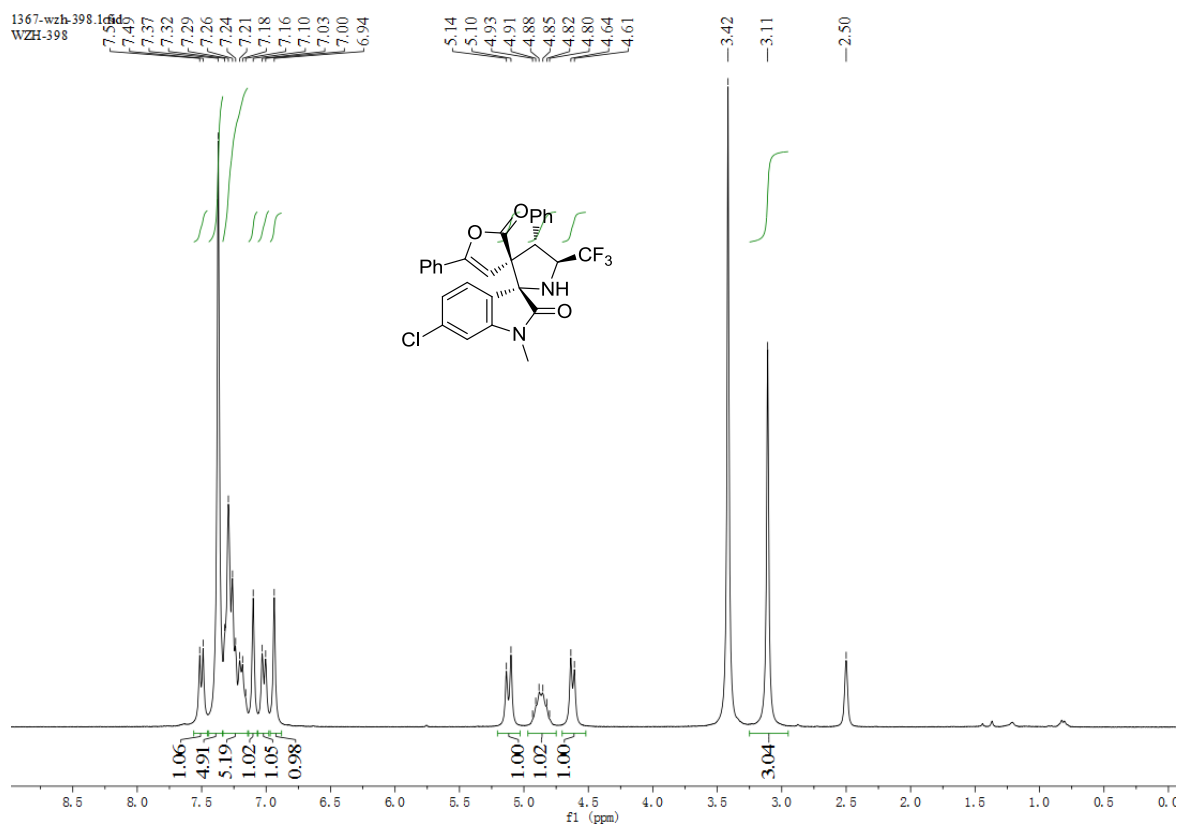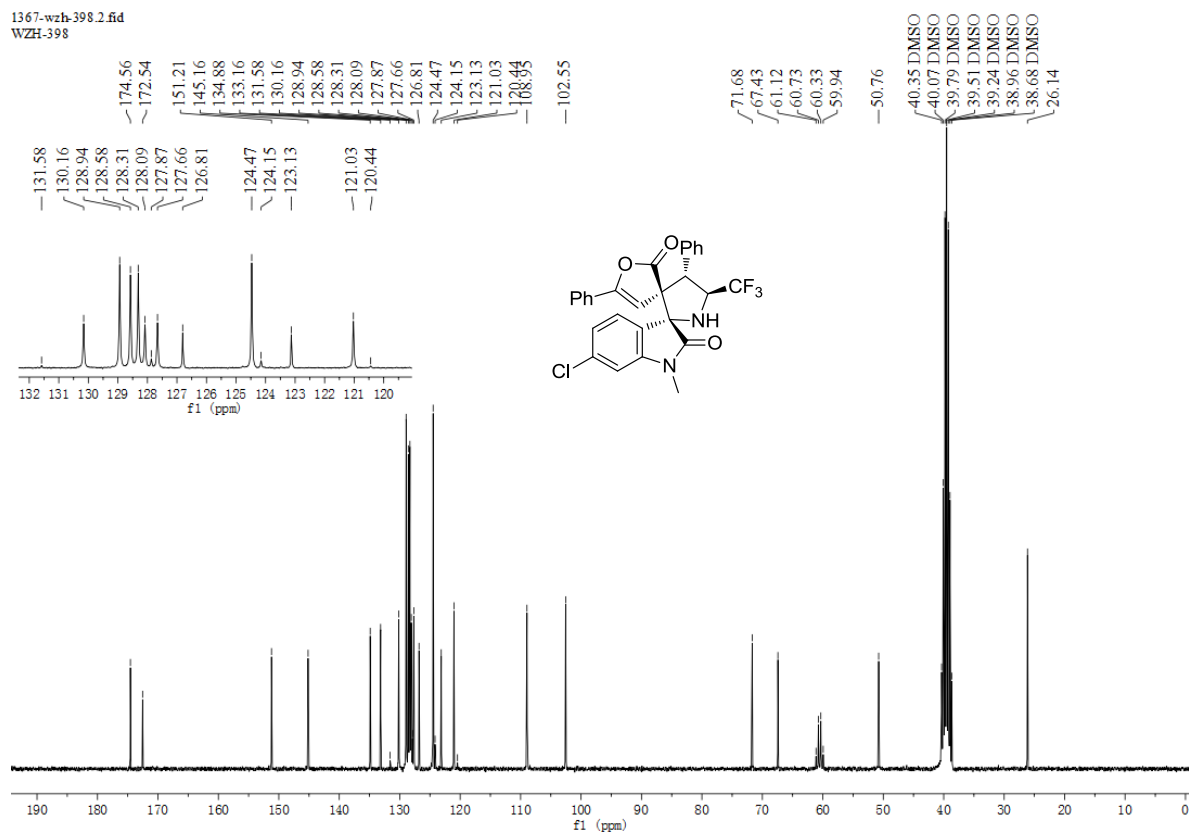



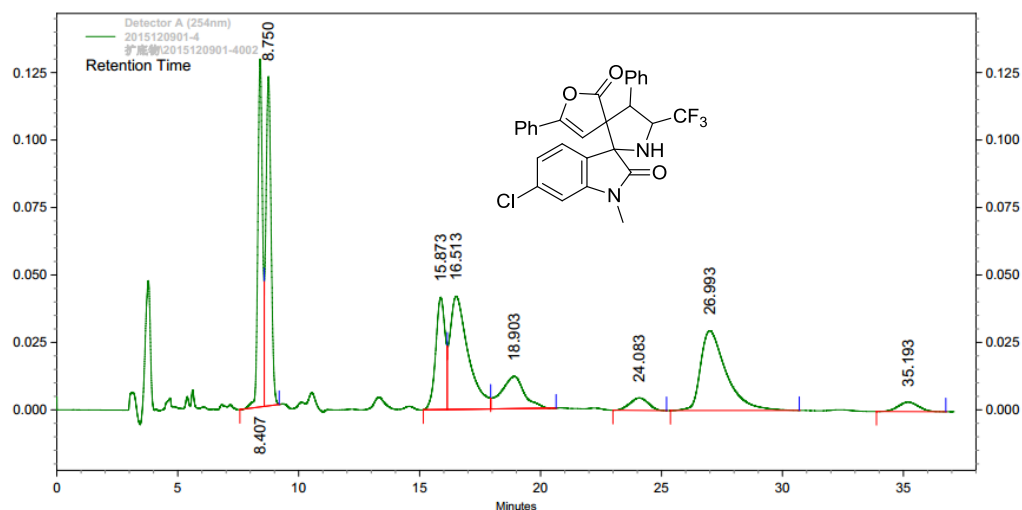

Detector  
A  
(254nm)

| Pk # | Retention Time | Height | Height Percent | Area    | Area Percent |
|------|----------------|--------|----------------|---------|--------------|
| 1    | 8.407          | 128902 | 33.55          | 1711242 | 16.62        |
| 2    | 8.750          | 121993 | 31.75          | 1828359 | 17.76        |
| 3    | 15.873         | 41629  | 10.84          | 1123876 | 10.91        |
| 4    | 16.513         | 41976  | 10.93          | 2220186 | 21.56        |
| 5    | 18.903         | 11972  | 3.12           | 791098  | 7.68         |
| 6    | 24.083         | 4620   | 1.20           | 243876  | 2.37         |
| 7    | 26.993         | 29592  | 7.70           | 2172455 | 21.10        |
| 8    | 35.193         | 3500   | 0.91           | 205579  | 2.00         |

| Totals |  | 384184 | 100.00 | 10296671 | 100.00 |
|--------|--|--------|--------|----------|--------|
|--------|--|--------|--------|----------|--------|

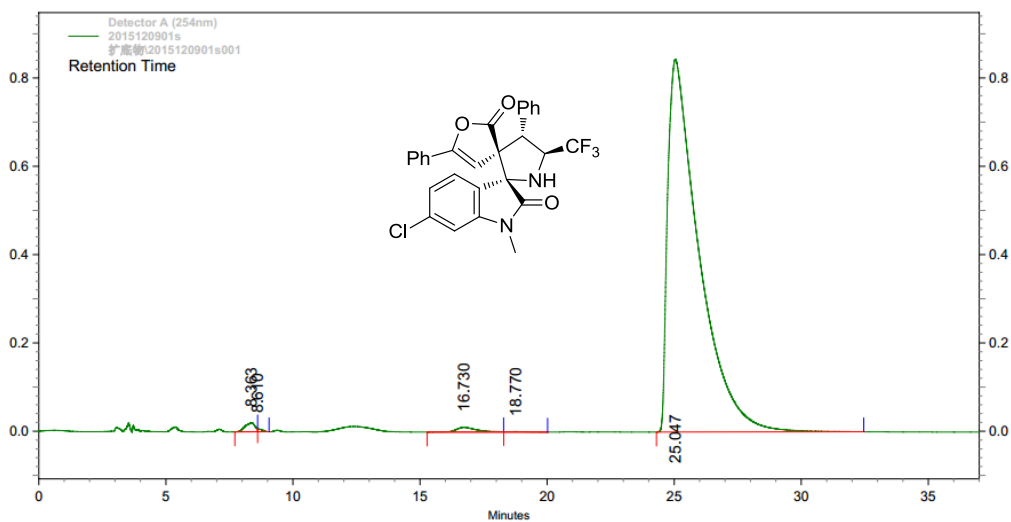

Detector  
A  
(254nm)

| Pk # | Retention Time | Height | Height Percent | Area     | Area Percent |
|------|----------------|--------|----------------|----------|--------------|
| 1    | 8.363          | 20777  | 2.35           | 557871   | 0.76         |
| 2    | 8.610          | 6805   | 0.77           | 81652    | 0.11         |
| 3    | 16.730         | 10381  | 1.18           | 580192   | 0.79         |
| 4    | 18.770         | 856    | 0.10           | 50616    | 0.07         |
| 5    | 25.047         | 844226 | 95.60          | 71949952 | 98.27        |

| Totals |  | 883045 | 100.00 | 73220283 | 100.00 |
|--------|--|--------|--------|----------|--------|
|--------|--|--------|--------|----------|--------|

# <sup>1</sup>H NMR, <sup>13</sup>C NMR and HPLC of 3I

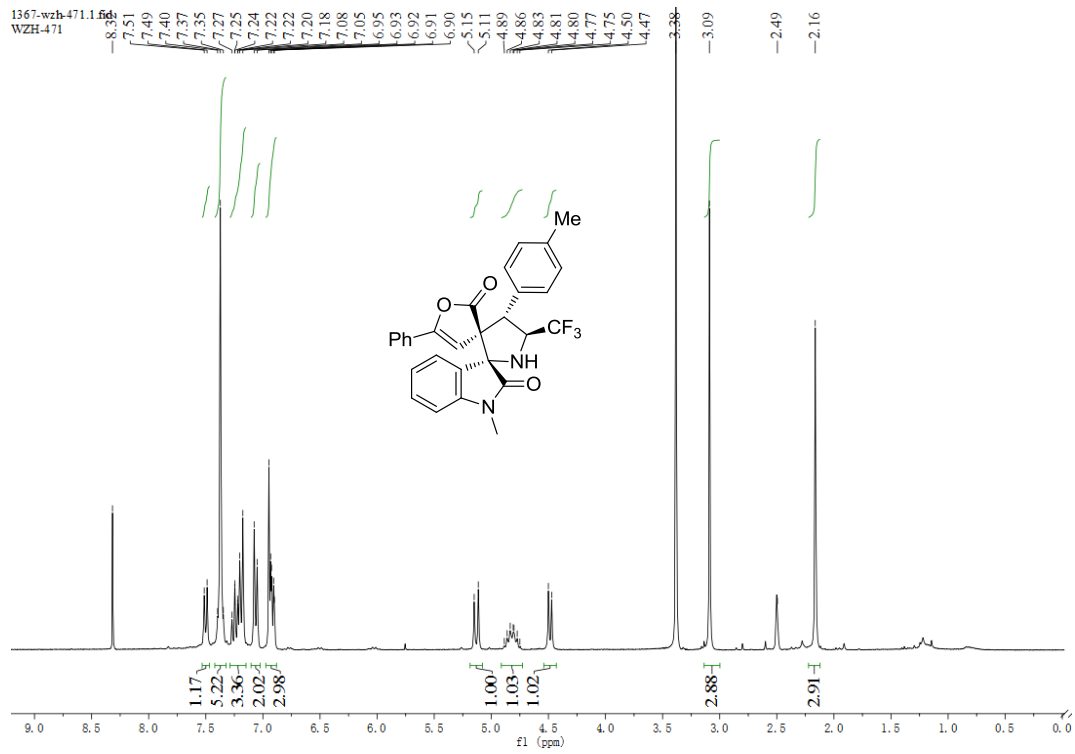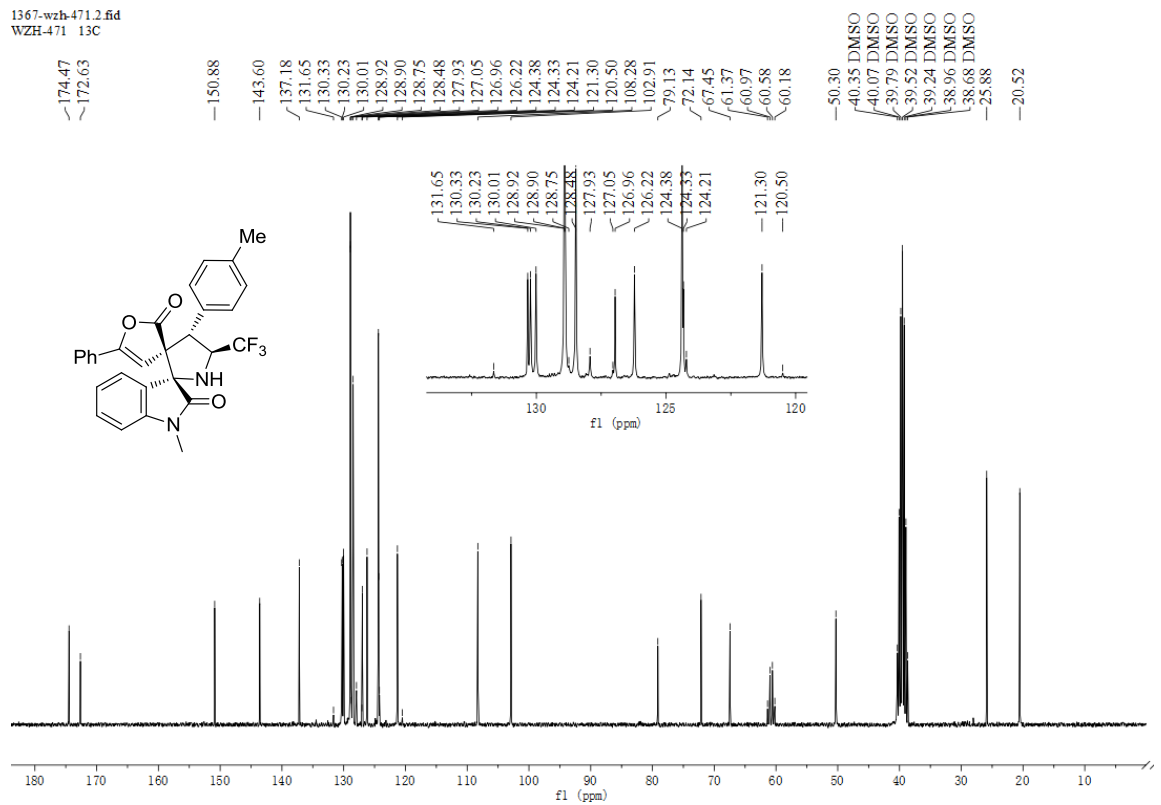

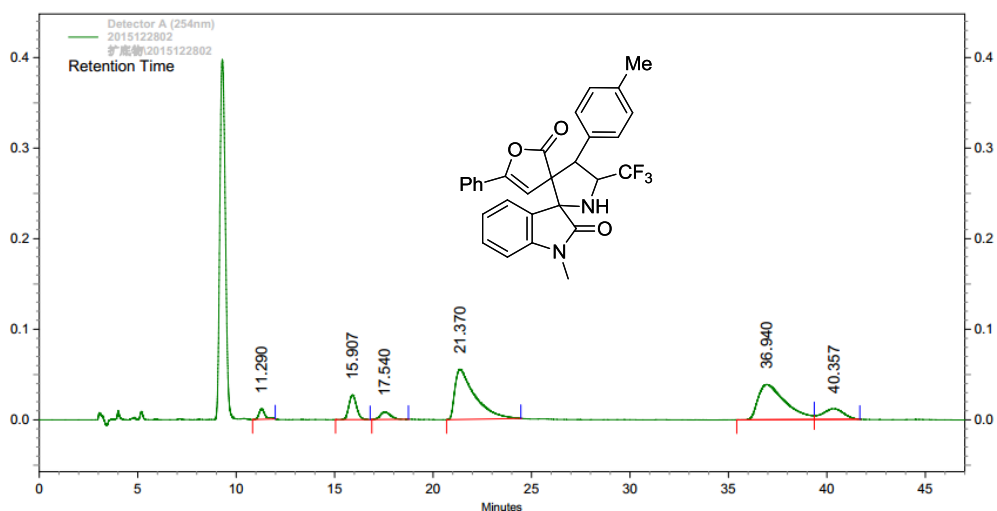

Detector A  
(254nm)

| PK # | Retention Time | Height | Height Percent | Area    | Area Percent |
|------|----------------|--------|----------------|---------|--------------|
| 1    | 11.290         | 11524  | 7.52           | 248295  | 2.56         |
| 2    | 15.907         | 27227  | 17.76          | 739848  | 7.62         |
| 3    | 17.540         | 8402   | 5.48           | 299371  | 3.08         |
| 4    | 21.370         | 55437  | 36.16          | 3874709 | 39.88        |
| 5    | 36.940         | 38973  | 25.42          | 3691692 | 38.00        |
| 6    | 40.357         | 11733  | 7.65           | 861423  | 8.87         |

| Totals | Area    | Area Percent |
|--------|---------|--------------|
|        | 153296  | 100.00       |
|        | 9715338 | 100.00       |

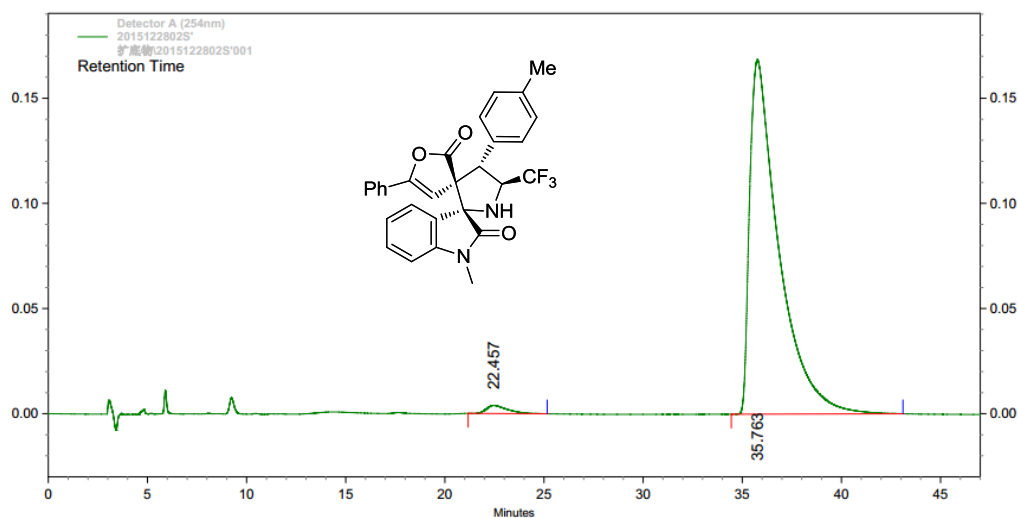

Detector A  
(254nm)

| PK # | Retention Time | Height | Height Percent | Area     | Area Percent |
|------|----------------|--------|----------------|----------|--------------|
| 1    | 22.457         | 3824   | 2.22           | 288920   | 1.65         |
| 2    | 35.763         | 168546 | 97.78          | 17182045 | 98.35        |

| Totals | Area     | Area Percent |
|--------|----------|--------------|
|        | 172370   | 100.00       |
|        | 17470965 | 100.00       |

# <sup>1</sup>H NMR, <sup>13</sup>C NMR and HPLC of 3m

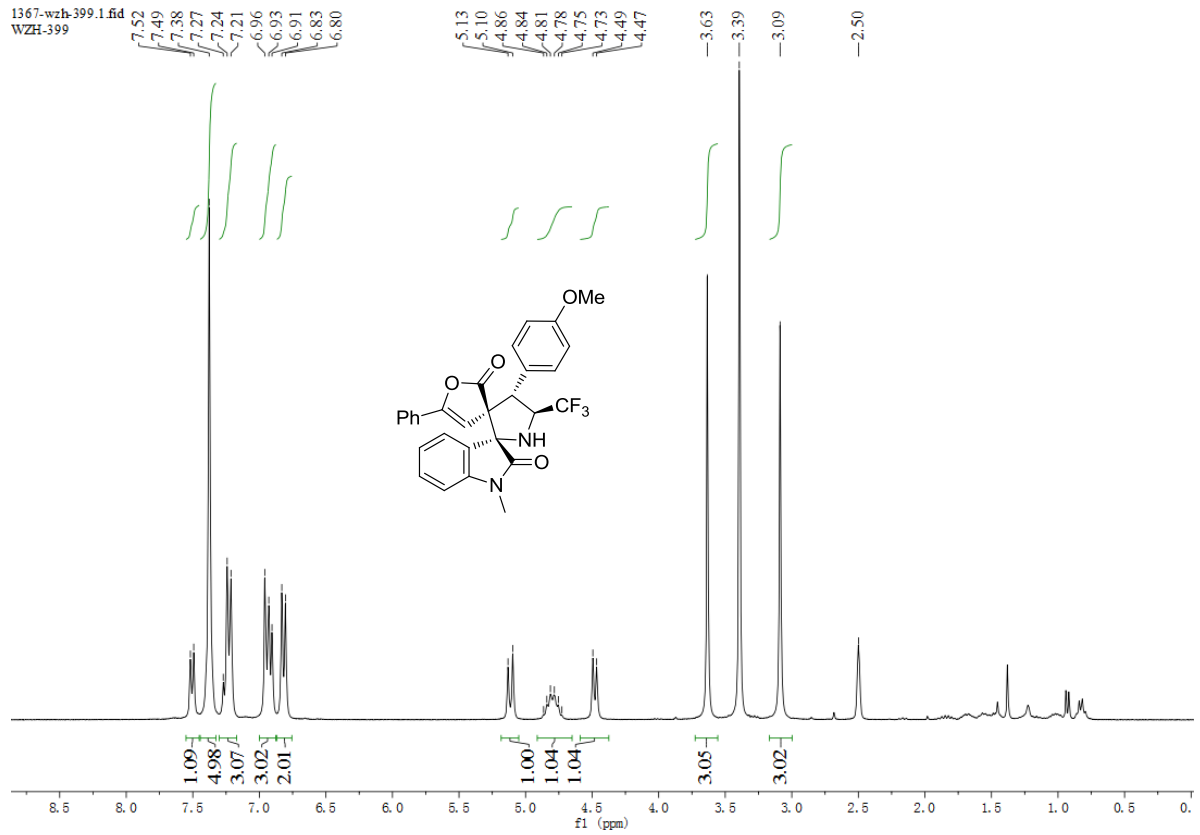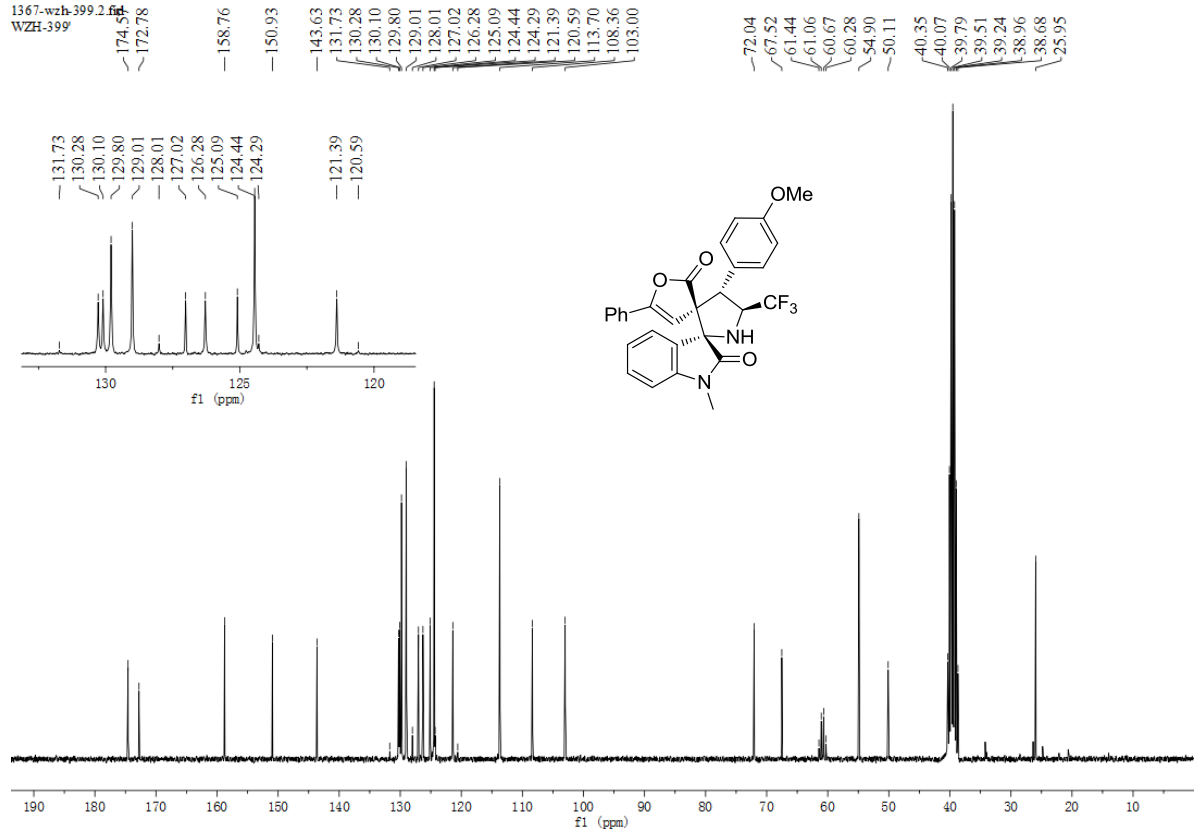

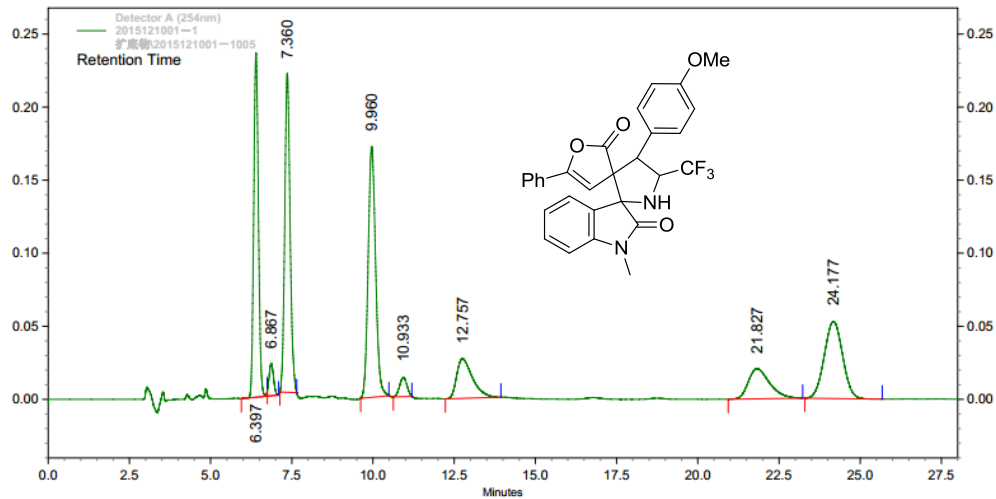

Detector  
A  
(254nm)

| Pk # | Retention Time | Height | Height Percent | Area    | Area Percent |
|------|----------------|--------|----------------|---------|--------------|
| 1    | 6.397          | 235650 | 30.96          | 2354168 | 19.77        |
| 2    | 6.867          | 22098  | 2.90           | 211611  | 1.78         |
| 3    | 7.360          | 217989 | 28.64          | 2490085 | 20.91        |
| 4    | 9.960          | 171625 | 22.55          | 2722143 | 22.86        |
| 5    | 10.933         | 13184  | 1.73           | 207472  | 1.74         |
| 6    | 12.757         | 27162  | 3.57           | 915212  | 7.69         |
| 7    | 21.827         | 20568  | 2.70           | 938702  | 7.88         |
| 8    | 24.177         | 52804  | 6.94           | 2068292 | 17.37        |

|        |  |        |        |          |        |
|--------|--|--------|--------|----------|--------|
| Totals |  | 761080 | 100.00 | 11907685 | 100.00 |
|--------|--|--------|--------|----------|--------|

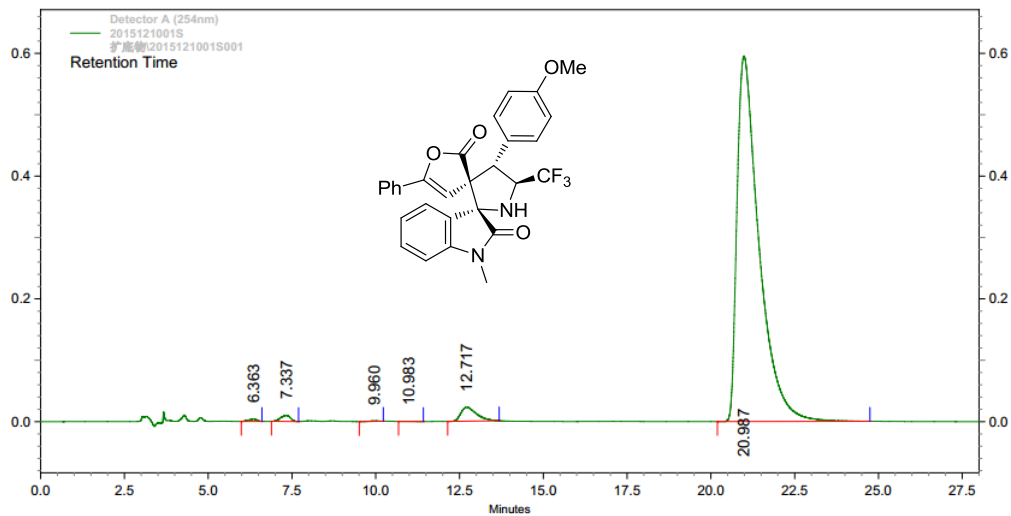

Detector  
A  
(254nm)

| Pk # | Retention Time | Height | Height Percent | Area     | Area Percent |
|------|----------------|--------|----------------|----------|--------------|
| 1    | 6.363          | 3739   | 0.59           | 63416    | 0.23         |
| 2    | 7.337          | 9859   | 1.56           | 200213   | 0.71         |
| 3    | 9.960          | 811    | 0.13           | 12833    | 0.05         |
| 4    | 10.983         | 96     | 0.02           | 1627     | 0.01         |
| 5    | 12.717         | 22579  | 3.57           | 740409   | 2.63         |
| 6    | 20.987         | 595421 | 94.14          | 27132935 | 96.38        |

|        |  |        |        |          |        |
|--------|--|--------|--------|----------|--------|
| Totals |  | 632505 | 100.00 | 28151433 | 100.00 |
|--------|--|--------|--------|----------|--------|

# <sup>1</sup>H NMR, <sup>13</sup>C NMR and HPLC of 3n

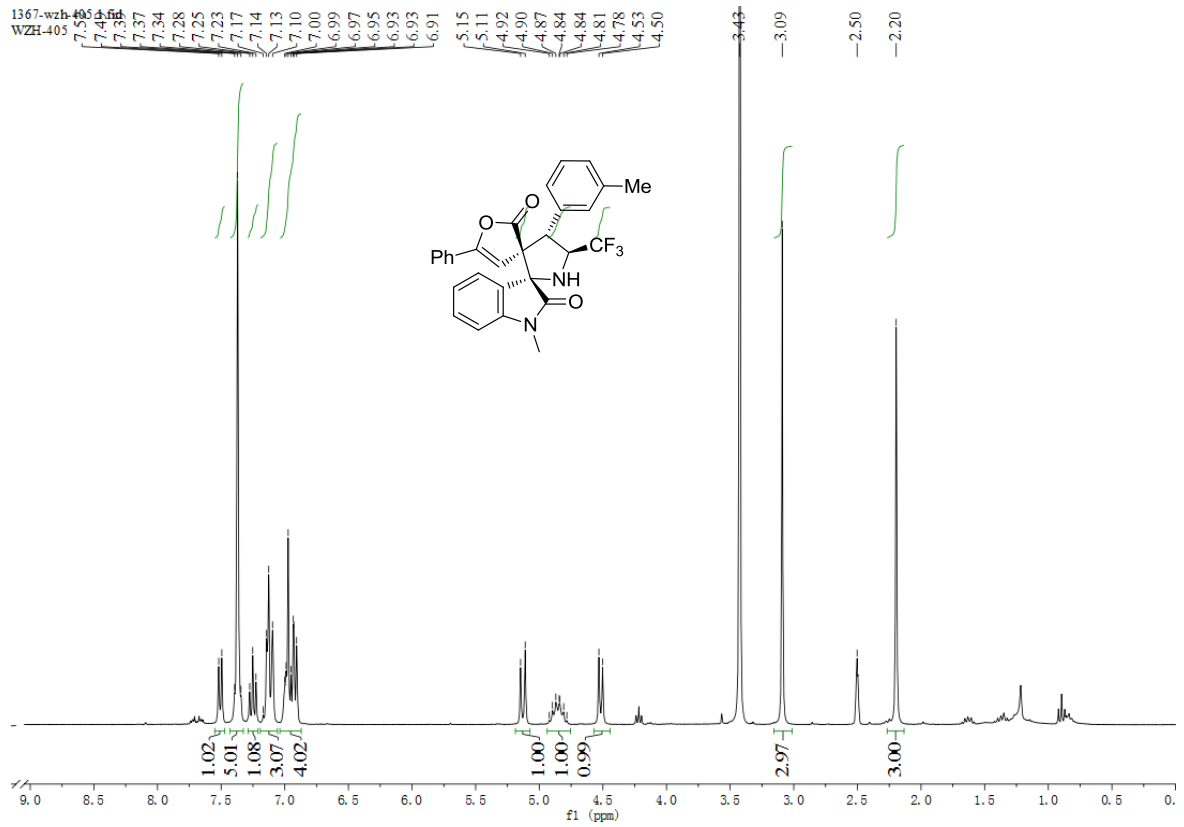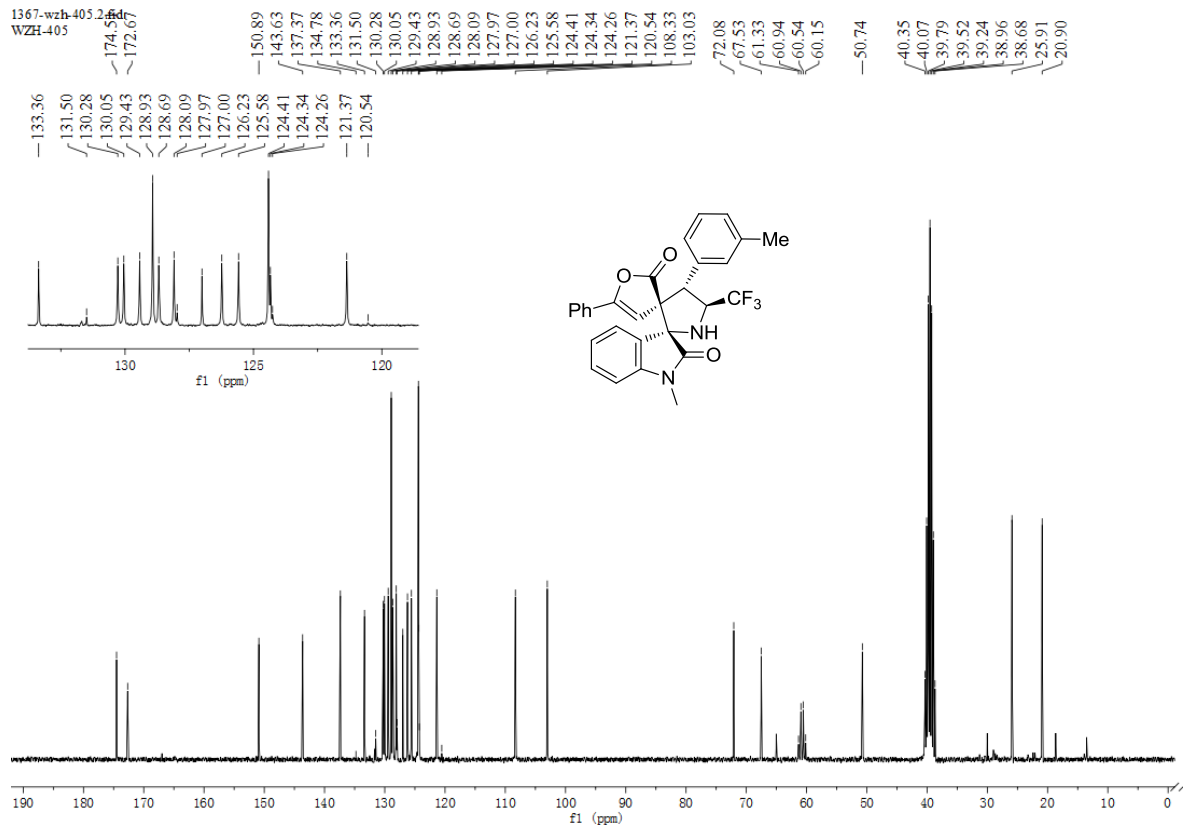

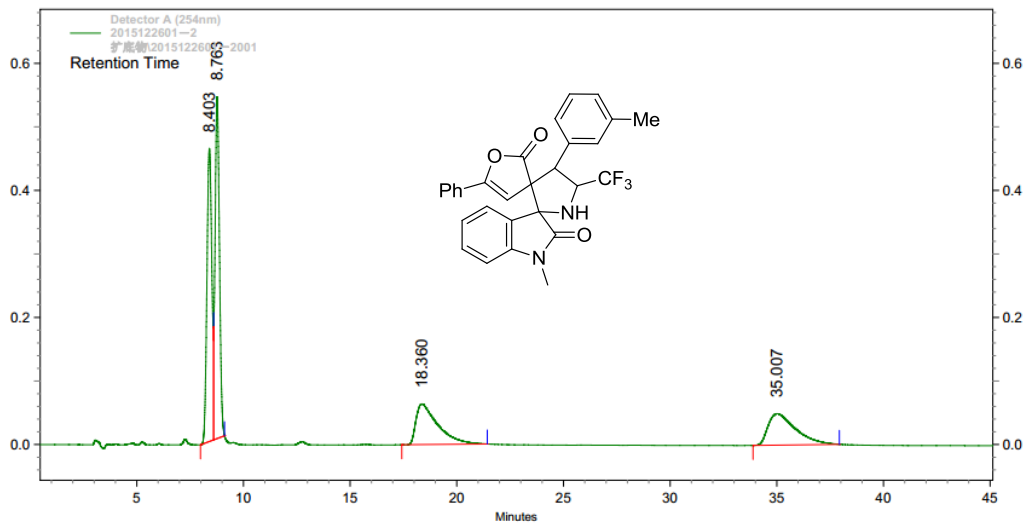

| PK # | Retention Time | Height | Height Percent | Area    | Area Percent |
|------|----------------|--------|----------------|---------|--------------|
| 1    | 8.403          | 461319 | 41.46          | 7369679 | 30.74        |
| 2    | 8.763          | 537818 | 48.34          | 7694116 | 32.10        |
| 3    | 18.360         | 63967  | 5.75           | 4501667 | 18.78        |
| 4    | 35.007         | 49525  | 4.45           | 4405459 | 18.38        |

| Totals | 1112629 | 100.00 | 23970921 | 100.00 |
|--------|---------|--------|----------|--------|
|--------|---------|--------|----------|--------|

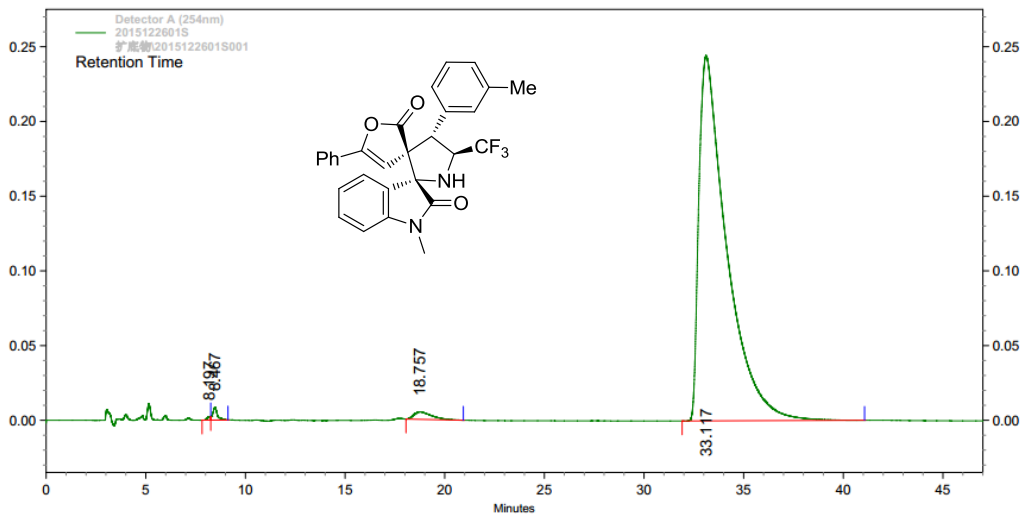

| PK # | Retention Time | Height | Height Percent | Area     | Area Percent |
|------|----------------|--------|----------------|----------|--------------|
| 1    | 8.197          | 2425   | 0.93           | 27581    | 0.11         |
| 2    | 8.467          | 8545   | 3.28           | 137025   | 0.57         |
| 3    | 18.757         | 4901   | 1.88           | 310807   | 1.29         |
| 4    | 33.117         | 244448 | 93.90          | 23612689 | 98.03        |

| Totals | 260319 | 100.00 | 24088102 | 100.00 |
|--------|--------|--------|----------|--------|
|--------|--------|--------|----------|--------|

# $^1\text{H}$ NMR, $^{13}\text{C}$ NMR and HPLC of 3o

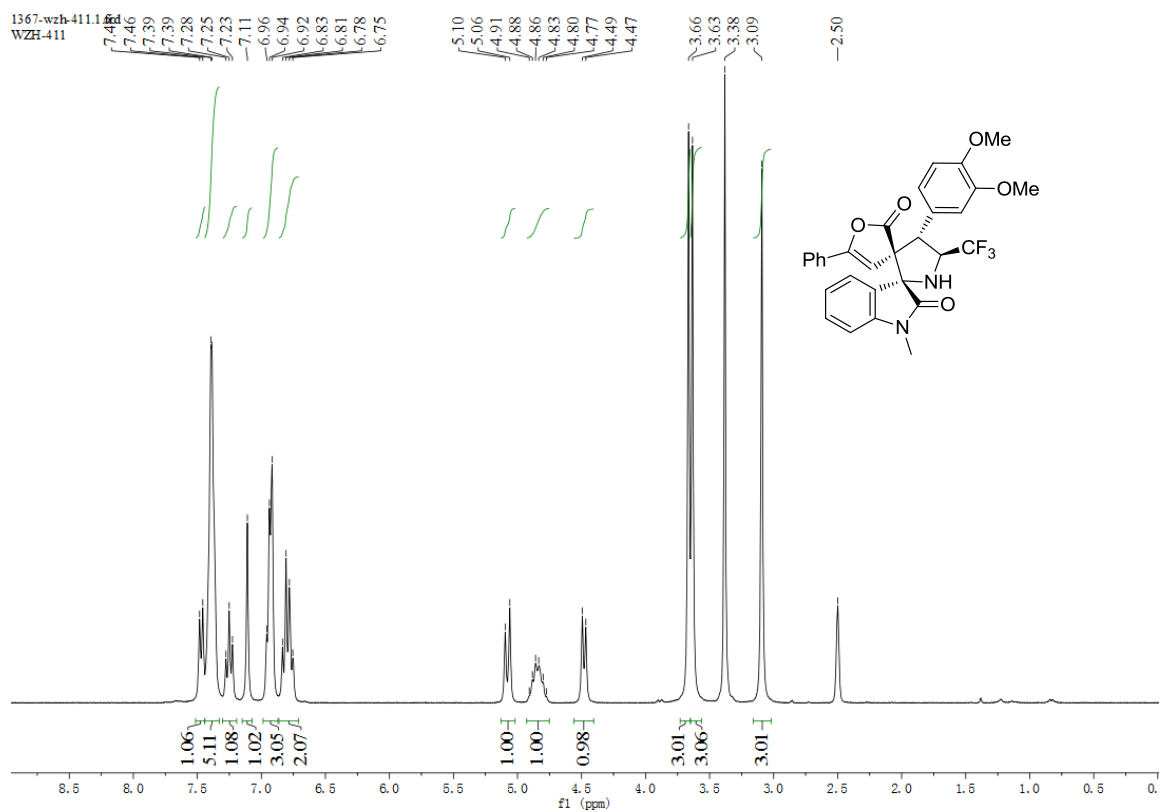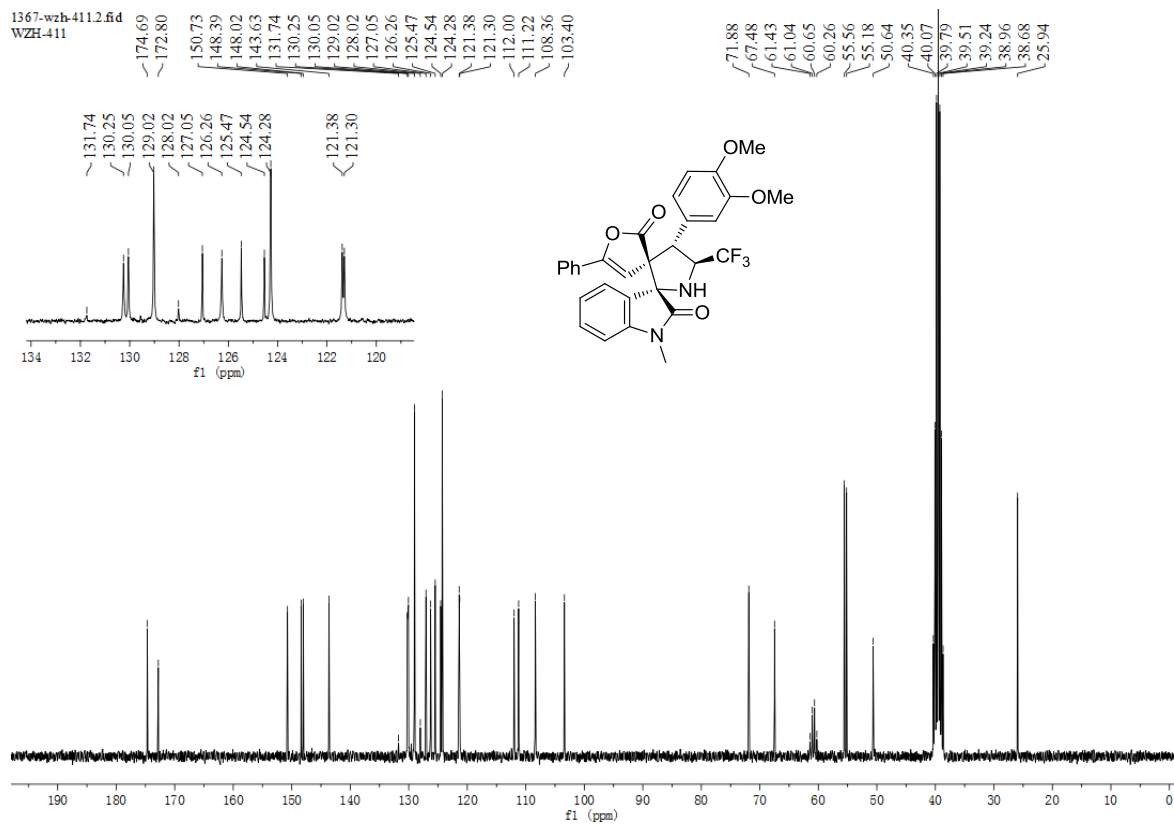



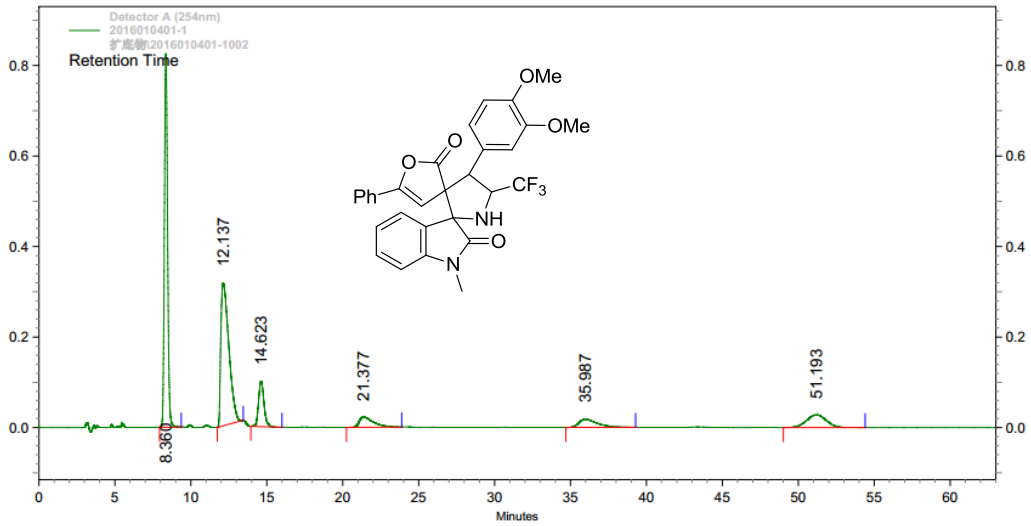

Detector  
A  
(254nm)

| Pk # | Retention Time | Height | Height Percent | Area     | Area Percent |
|------|----------------|--------|----------------|----------|--------------|
| 1    | 8.360          | 824981 | 62.97          | 11991395 | 37.89        |
| 2    | 12.137         | 315668 | 24.09          | 11580814 | 36.60        |
| 3    | 14.623         | 100506 | 7.67           | 2481663  | 7.84         |
| 4    | 21.377         | 22816  | 1.74           | 1498602  | 4.74         |
| 5    | 35.987         | 18063  | 1.38           | 1549375  | 4.90         |
| 6    | 51.193         | 28161  | 2.15           | 2543038  | 8.04         |

| Totals | Height  | Height Percent | Area     | Area Percent |
|--------|---------|----------------|----------|--------------|
|        | 1310195 | 100.00         | 31644887 | 100.00       |

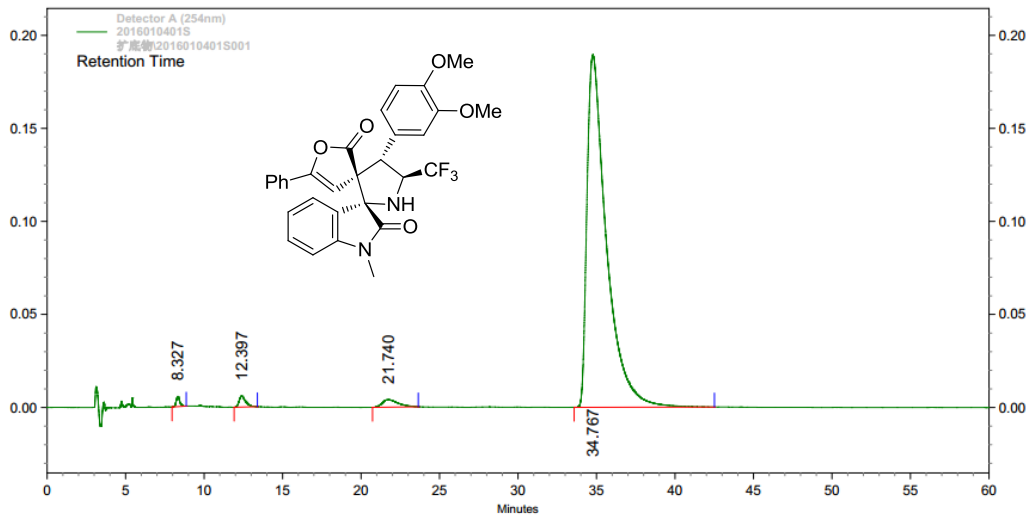

Detector  
A  
(254nm)

| Pk # | Retention Time | Height | Height Percent | Area     | Area Percent |
|------|----------------|--------|----------------|----------|--------------|
| 1    | 8.327          | 5477   | 2.67           | 85544    | 0.51         |
| 2    | 12.397         | 5989   | 2.92           | 171562   | 1.02         |
| 3    | 21.740         | 4019   | 1.96           | 281646   | 1.68         |
| 4    | 34.767         | 189375 | 92.44          | 16271474 | 96.80        |

| Totals | Height | Height Percent | Area     | Area Percent |
|--------|--------|----------------|----------|--------------|
|        | 204860 | 100.00         | 16810226 | 100.00       |

# <sup>1</sup>H NMR, <sup>13</sup>C NMR and HPLC of 3p

1367-wzh-408.1.fid  
WZH-408

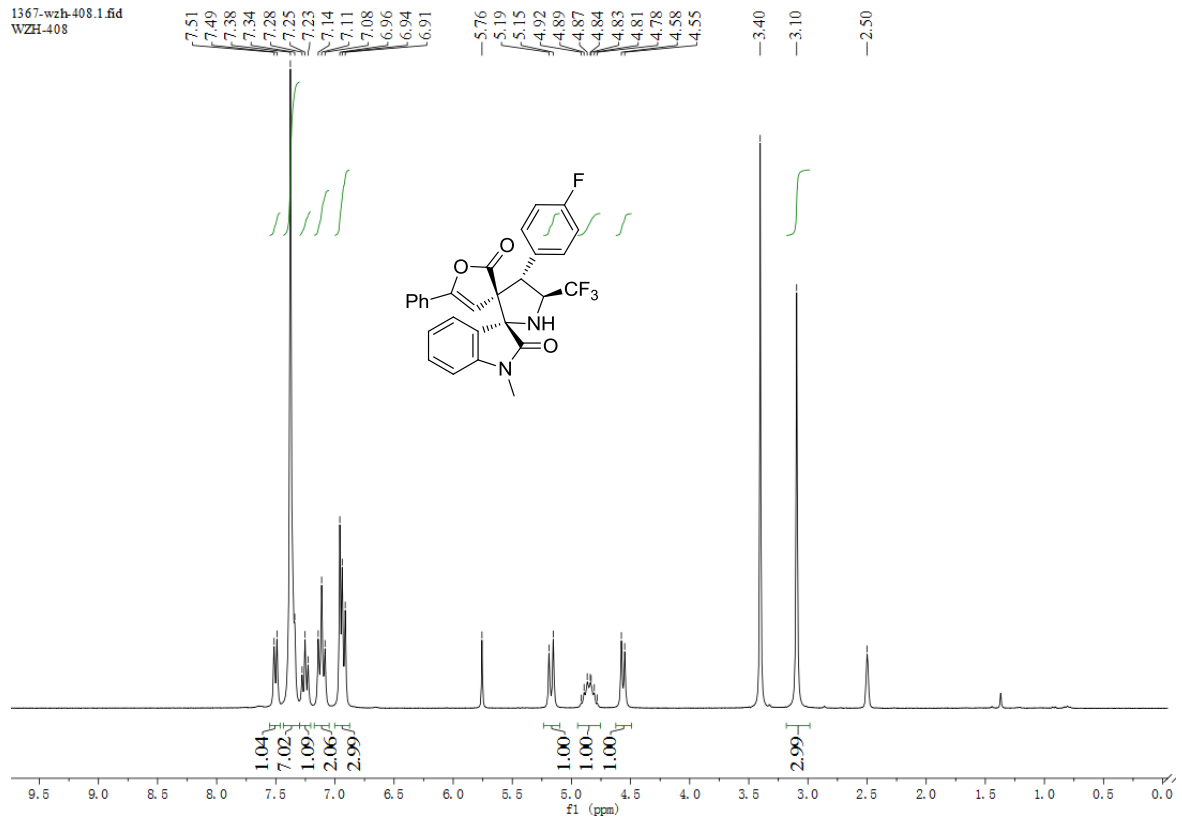

1367-wzh-408.2.fid  
WZH-408 13C

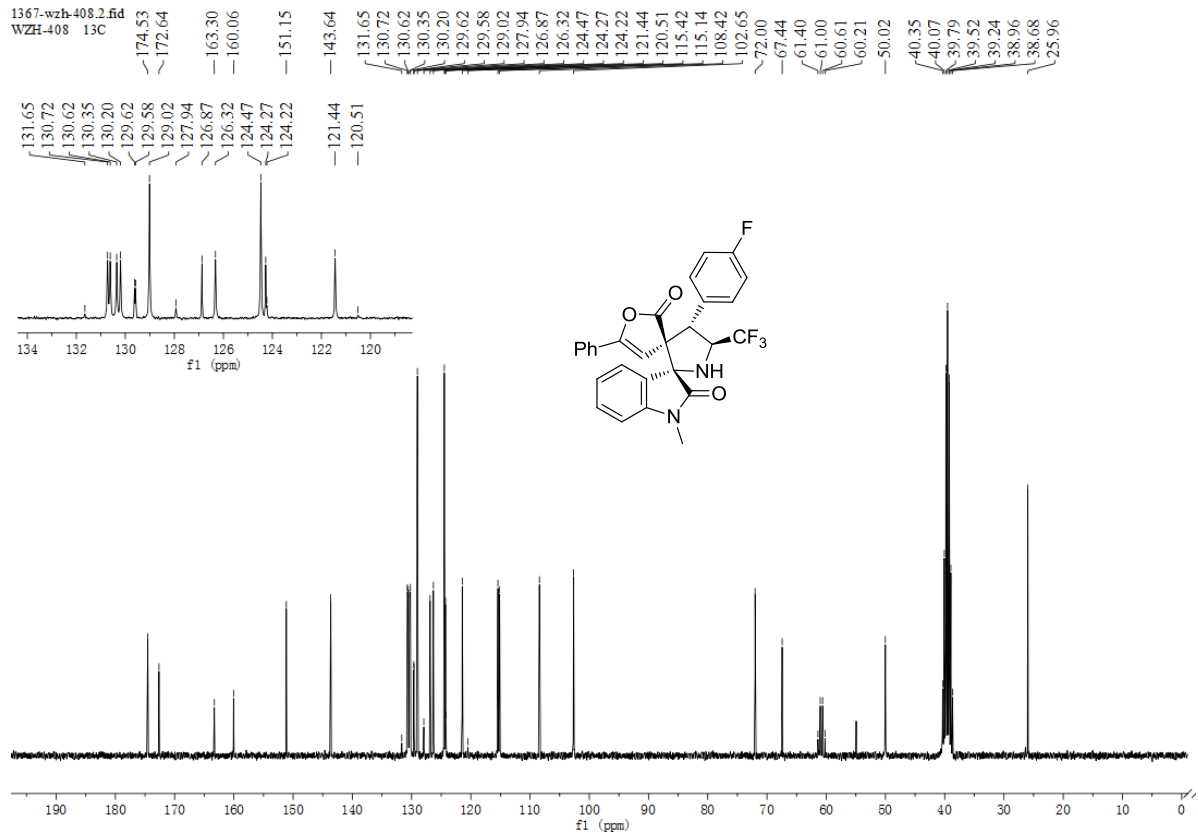

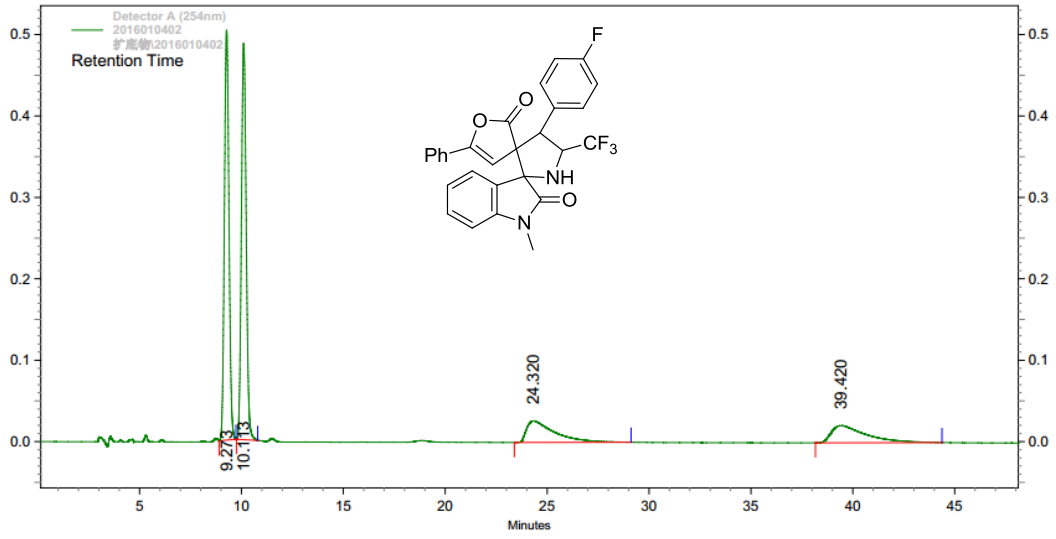

Detector  
A  
(254nm)

| Pk # | Retention Time | Height | Height Percent | Area    | Area Percent |
|------|----------------|--------|----------------|---------|--------------|
| 1    | 9.273          | 503442 | 48.52          | 7860409 | 37.69        |
| 2    | 10.113         | 486763 | 46.91          | 7972570 | 38.22        |
| 3    | 24.320         | 26399  | 2.54           | 2534449 | 12.15        |
| 4    | 39.420         | 21069  | 2.03           | 2490360 | 11.94        |

| Totals | 1037673 | 100.00 | 20857788 | 100.00 |
|--------|---------|--------|----------|--------|
|--------|---------|--------|----------|--------|

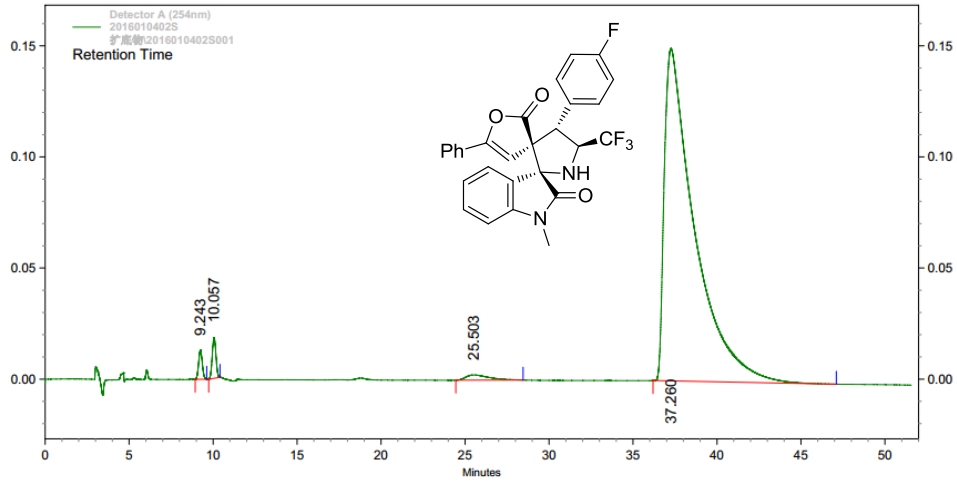

Detector  
A  
(254nm)

| Pk # | Retention Time | Height | Height Percent | Area     | Area Percent |
|------|----------------|--------|----------------|----------|--------------|
| 1    | 9.243          | 12997  | 7.09           | 199040   | 1.03         |
| 2    | 10.057         | 18288  | 9.98           | 282160   | 1.46         |
| 3    | 25.503         | 2350   | 1.28           | 225162   | 1.17         |
| 4    | 37.260         | 149582 | 81.64          | 18608706 | 96.34        |

| Totals | 183217 | 100.00 | 19315068 | 100.00 |
|--------|--------|--------|----------|--------|
|--------|--------|--------|----------|--------|

# <sup>1</sup>H NMR, <sup>13</sup>C NMR and HPLC of 3q

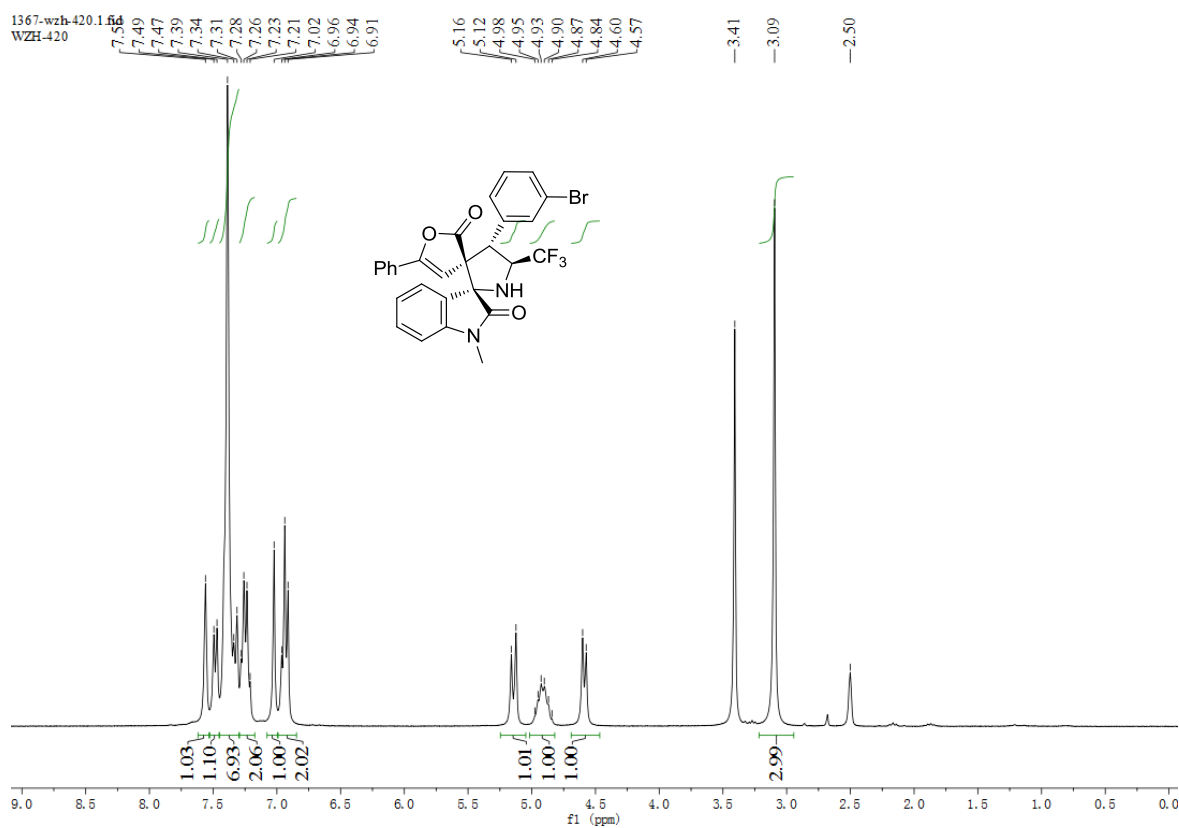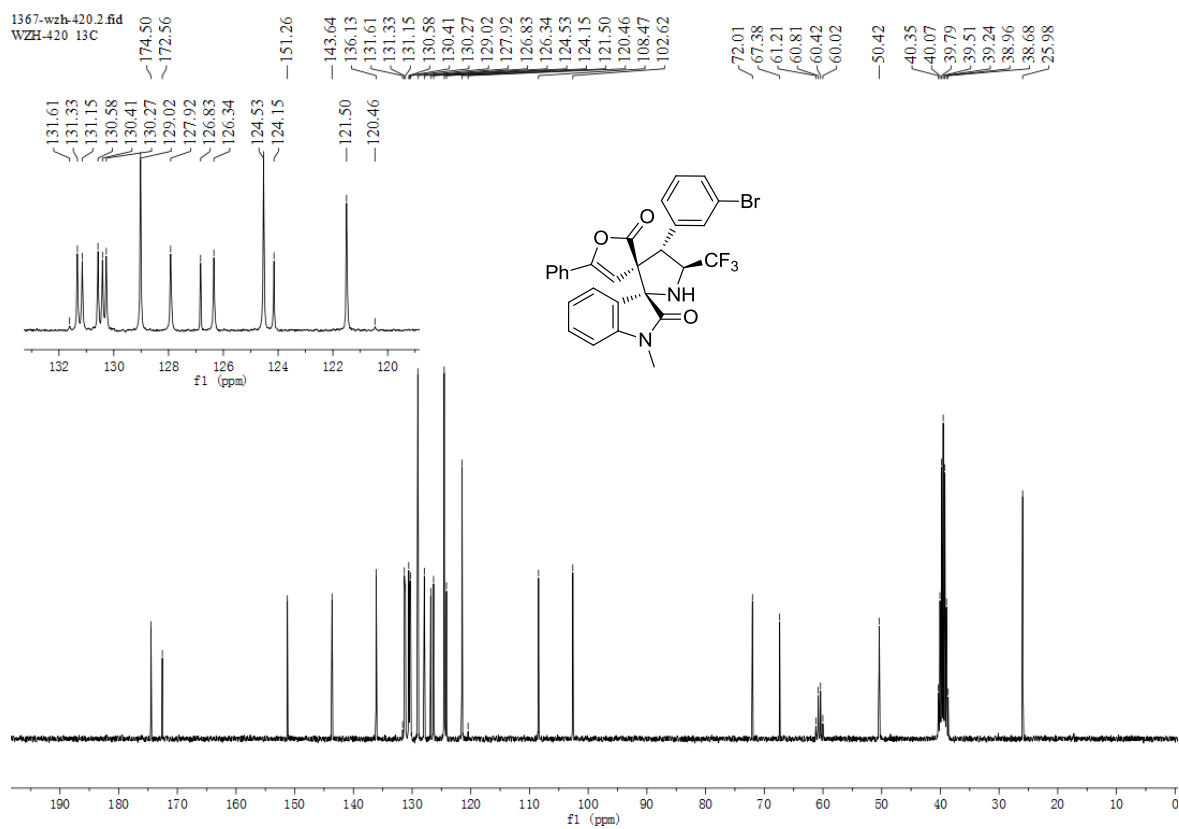

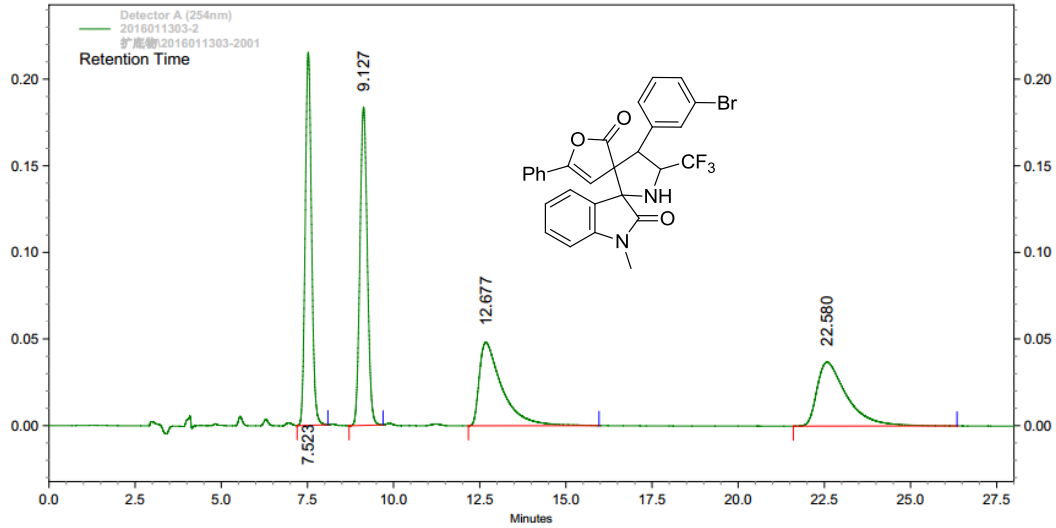

**Detector A (254nm)**

| Pk #          | Retention Time | Height | Height Percent | Area    | Area Percent |
|---------------|----------------|--------|----------------|---------|--------------|
| 1             | 7.523          | 215203 | 44.49          | 2738782 | 27.72        |
| 2             | 9.127          | 183484 | 37.93          | 2725045 | 27.58        |
| 3             | 12.677         | 48136  | 9.95           | 2205362 | 22.32        |
| 4             | 22.580         | 36878  | 7.62           | 2210282 | 22.37        |
| <b>Totals</b> |                | 483701 | 100.00         | 9879471 | 100.00       |

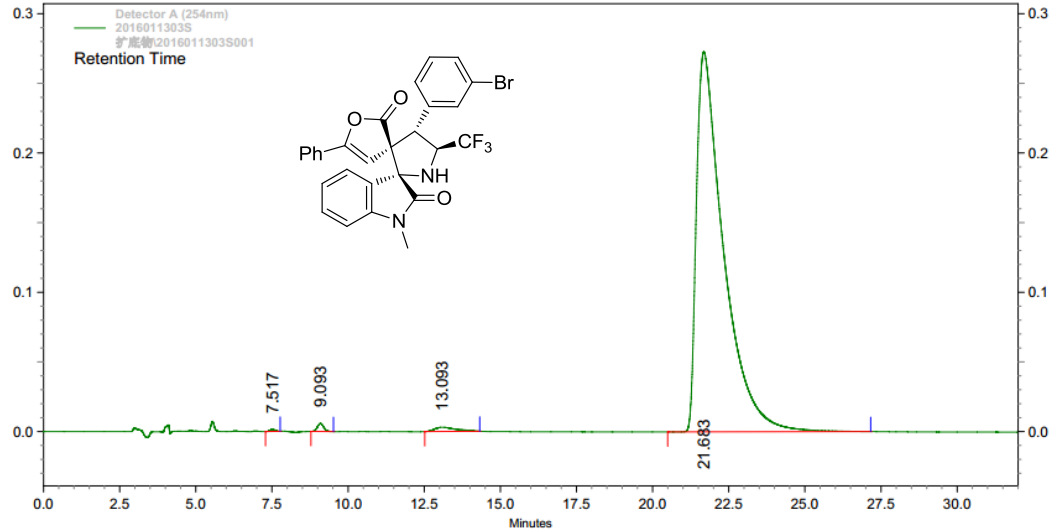

**Detector A (254nm)**

| Pk #          | Retention Time | Height | Height Percent | Area     | Area Percent |
|---------------|----------------|--------|----------------|----------|--------------|
| 1             | 7.517          | 1402   | 0.50           | 16385    | 0.10         |
| 2             | 9.093          | 5737   | 2.03           | 82721    | 0.48         |
| 3             | 13.093         | 3024   | 1.07           | 148991   | 0.87         |
| 4             | 21.683         | 272842 | 96.41          | 16895269 | 98.55        |
| <b>Totals</b> |                | 283005 | 100.00         | 17143366 | 100.00       |



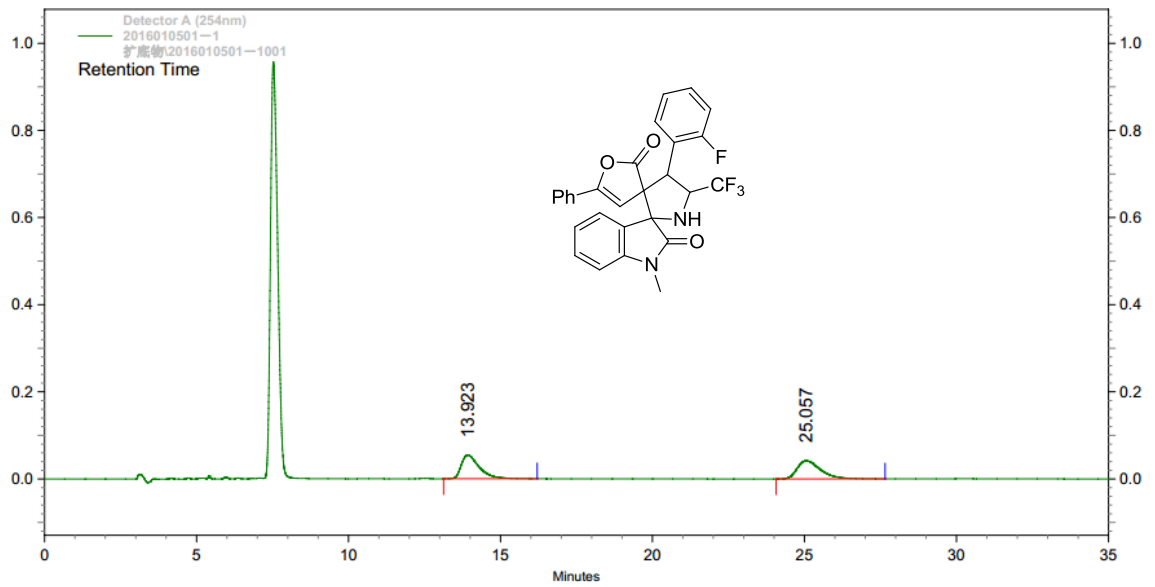

Detector

A

(254nm)

| PK # | Retention Time | Height | Height Percent | Area    | Area Percent |
|------|----------------|--------|----------------|---------|--------------|
| 1    | 13.923         | 54505  | 56.69          | 2246977 | 50.23        |
| 2    | 25.057         | 41634  | 43.31          | 2226127 | 49.77        |

| Totals |  | 96139 | 100.00 | 4473104 | 100.00 |
|--------|--|-------|--------|---------|--------|
|--------|--|-------|--------|---------|--------|

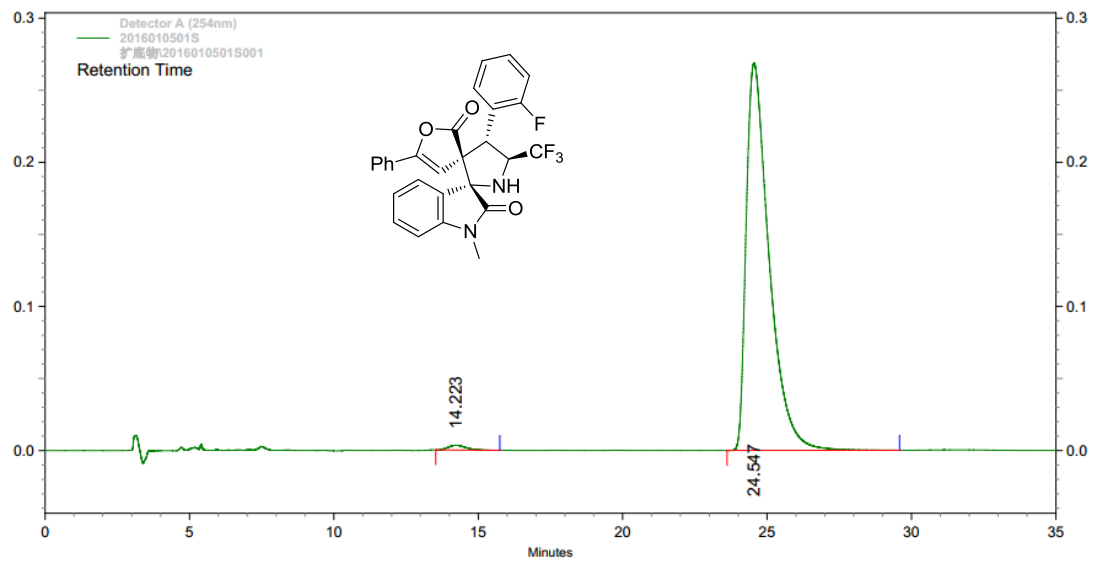

Detector

A

(254nm)

| PK # | Retention Time | Height | Height Percent | Area     | Area Percent |
|------|----------------|--------|----------------|----------|--------------|
| 1    | 14.223         | 3297   | 1.21           | 141602   | 0.95         |
| 2    | 24.547         | 268906 | 98.79          | 14819795 | 99.05        |

| Totals |  | 272203 | 100.00 | 14961397 | 100.00 |
|--------|--|--------|--------|----------|--------|
|--------|--|--------|--------|----------|--------|

# <sup>1</sup>H NMR, <sup>13</sup>C NMR and HPLC of 3s

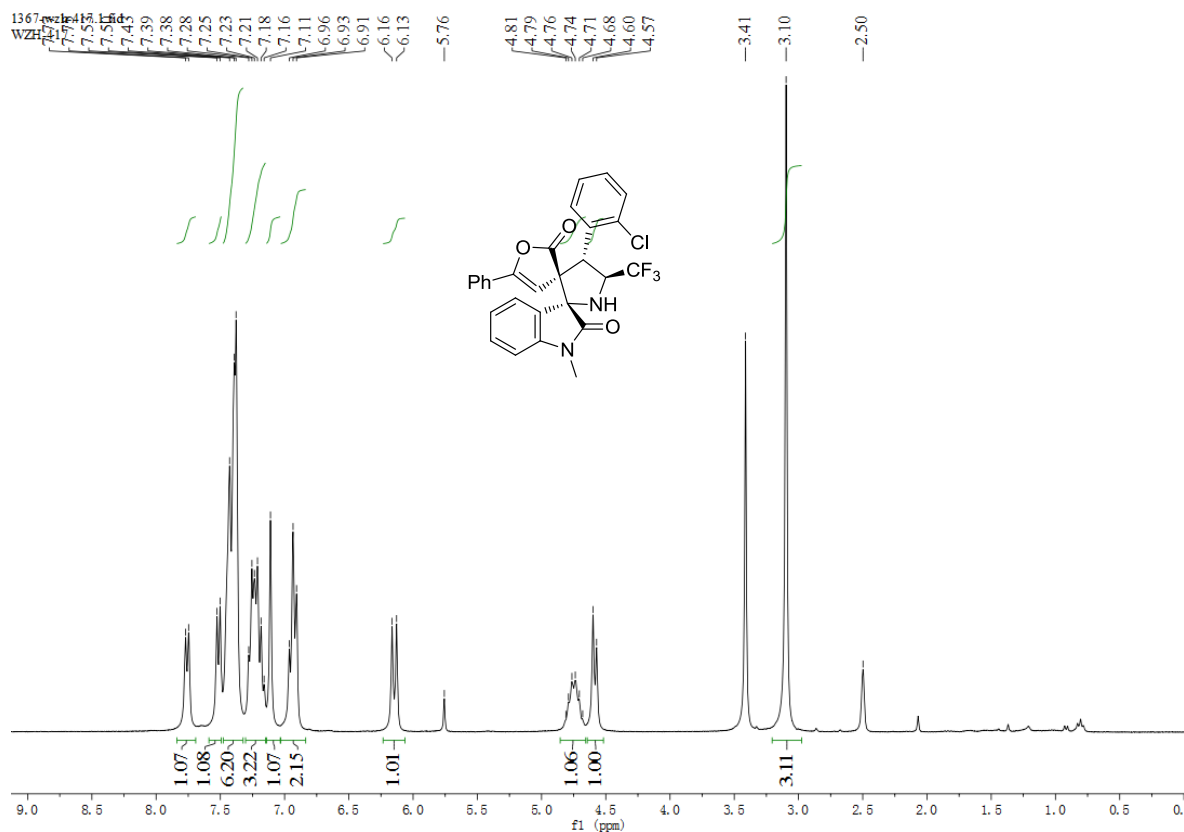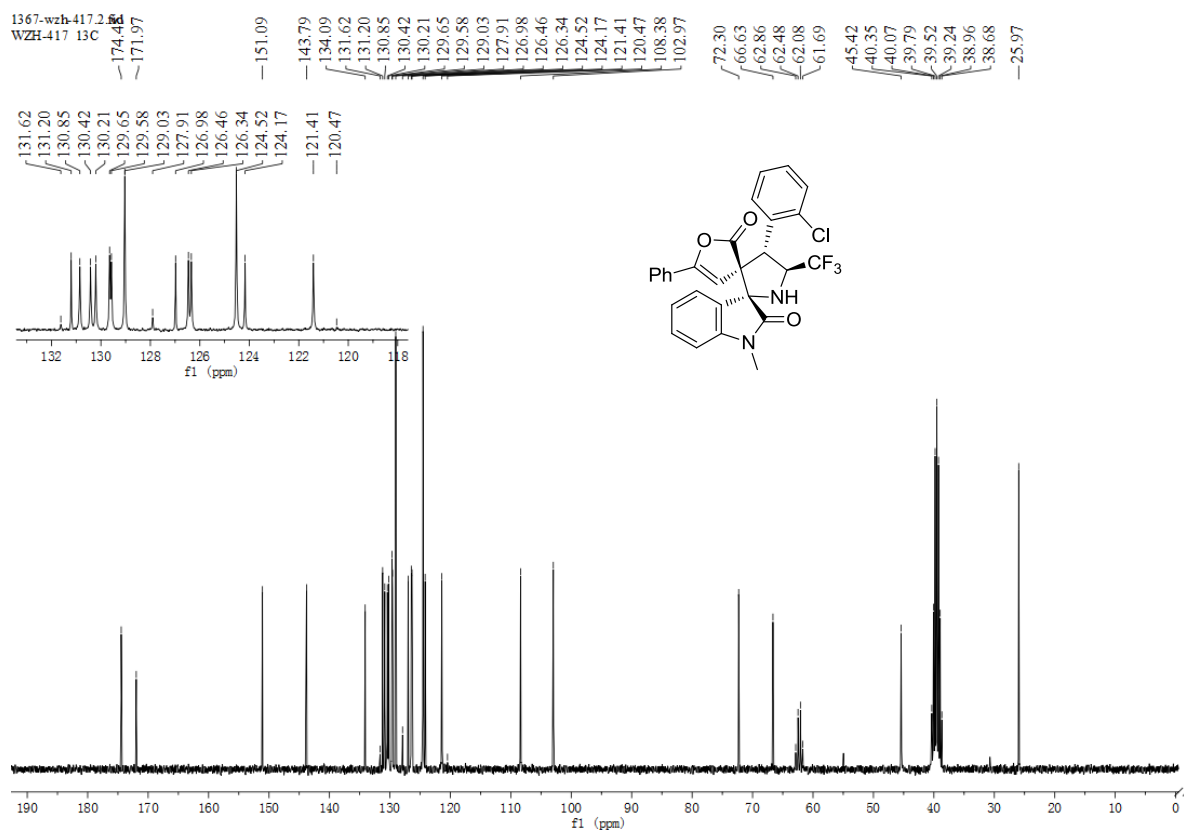



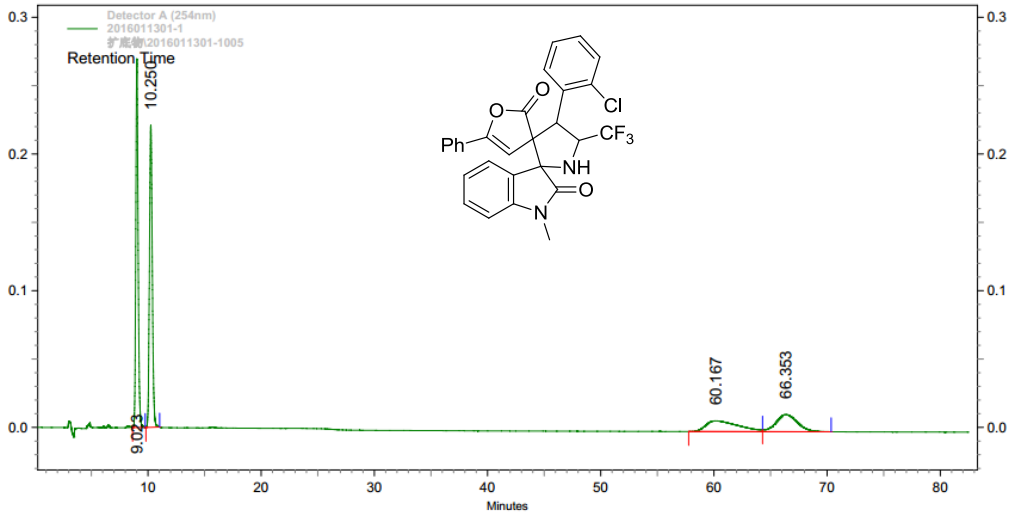

Detector  
A  
(254nm)

| PK # | Retention Time | Height | Height Percent | Area    | Area Percent |
|------|----------------|--------|----------------|---------|--------------|
| 1    | 9.023          | 269640 | 52.80          | 3810775 | 35.23        |
| 2    | 10.250         | 220817 | 43.24          | 3839878 | 35.50        |
| 3    | 60.167         | 7778   | 1.52           | 1542150 | 14.26        |
| 4    | 66.353         | 12471  | 2.44           | 1622917 | 15.01        |

| Totals |  | 510706 | 100.00 | 10815720 | 100.00 |
|--------|--|--------|--------|----------|--------|
|--------|--|--------|--------|----------|--------|

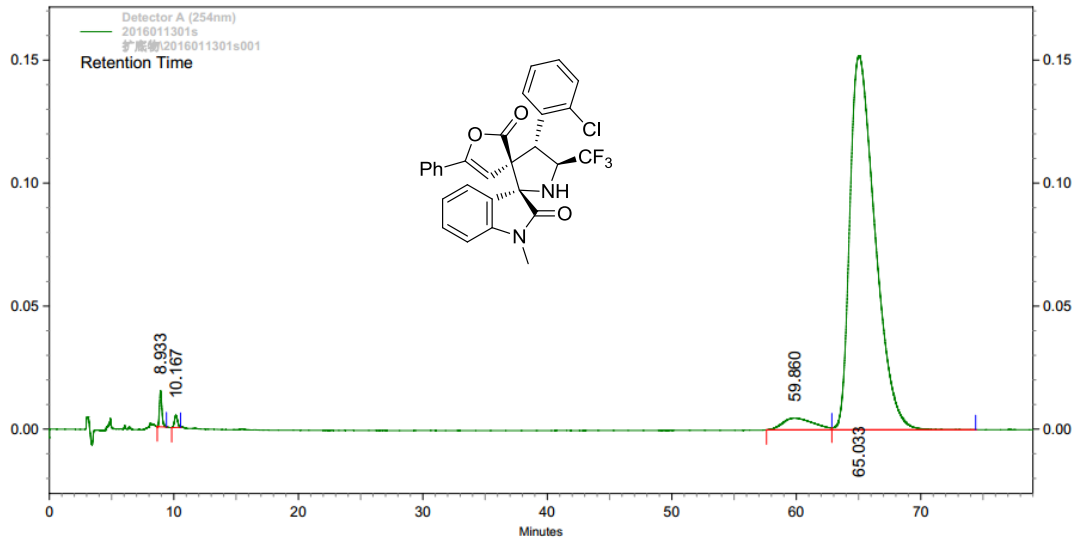

Detector  
A  
(254nm)

| PK # | Retention Time | Height | Height Percent | Area     | Area Percent |
|------|----------------|--------|----------------|----------|--------------|
| 1    | 8.933          | 14560  | 8.26           | 196452   | 0.88         |
| 2    | 10.167         | 4978   | 2.82           | 84852    | 0.38         |
| 3    | 59.860         | 4744   | 2.69           | 816717   | 3.64         |
| 4    | 65.033         | 152062 | 86.23          | 21342553 | 95.11        |

| Totals |  | 176344 | 100.00 | 22440574 | 100.00 |
|--------|--|--------|--------|----------|--------|
|--------|--|--------|--------|----------|--------|

# <sup>1</sup>H NMR, <sup>13</sup>C NMR and HPLC of 3t

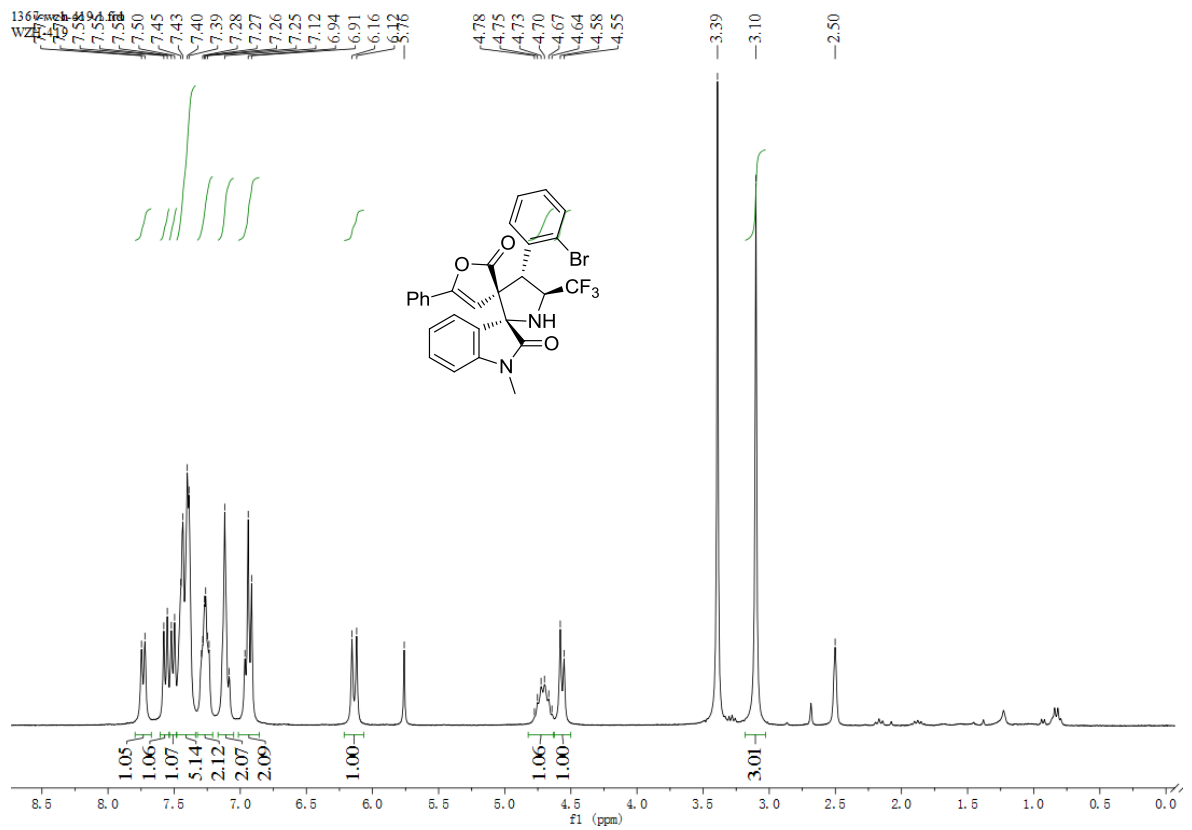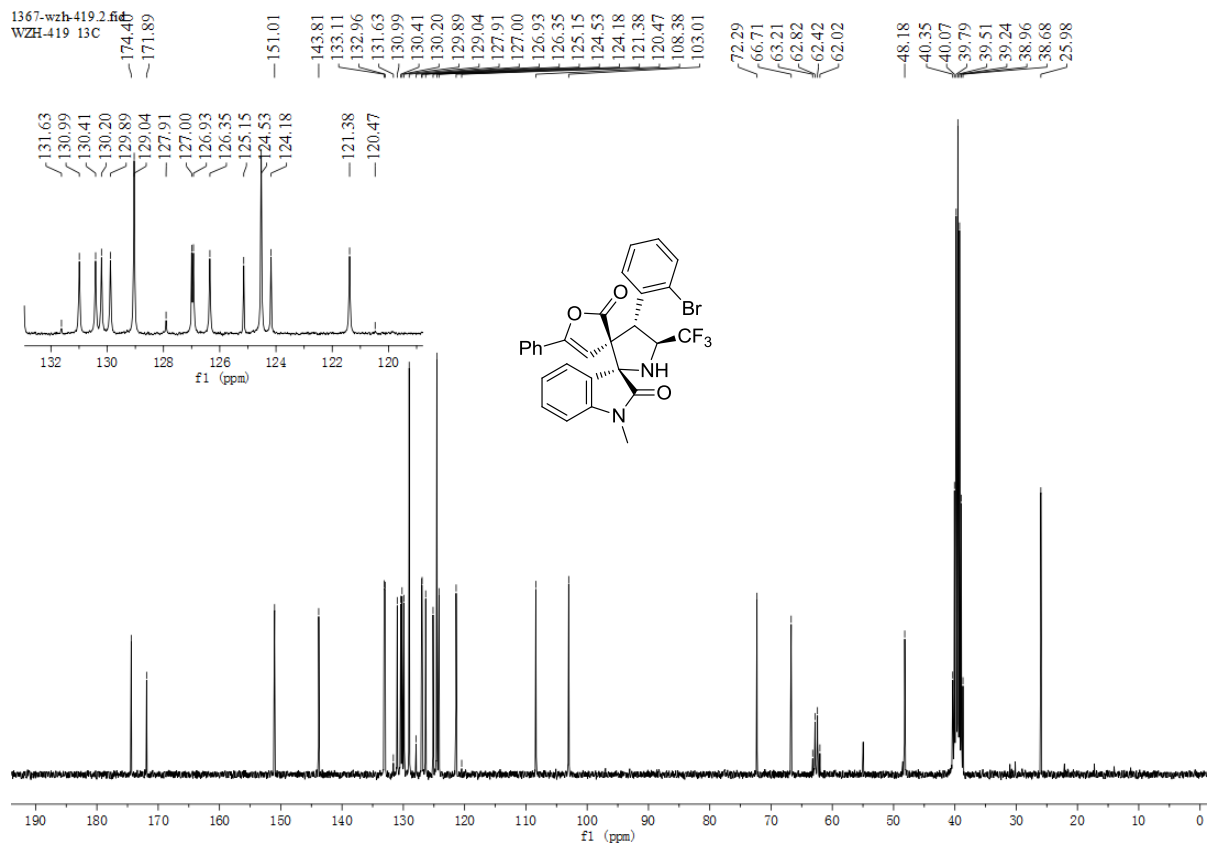

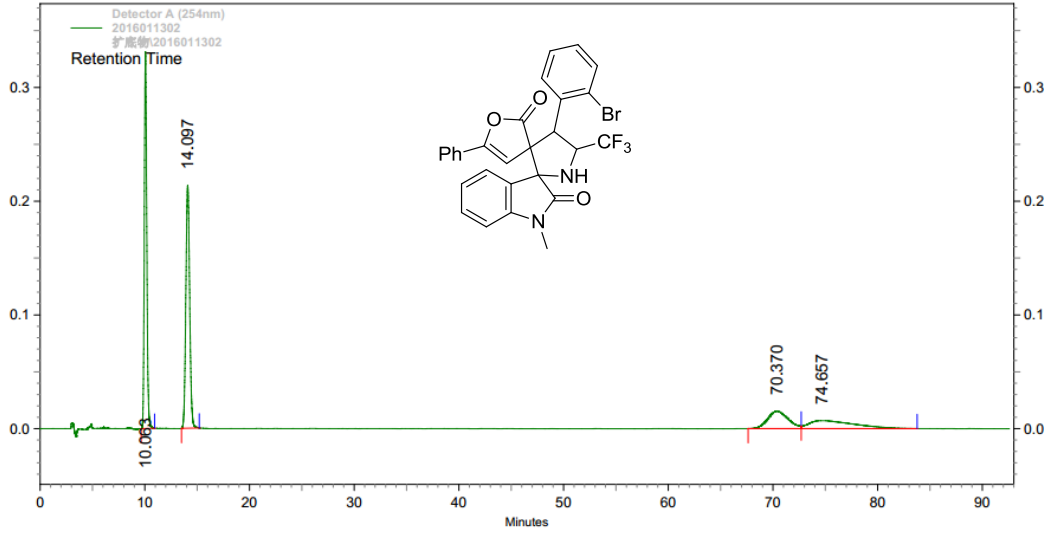

Detector  
A  
(254nm)

| Pk # | Retention Time | Height | Height Percent | Area    | Area Percent |
|------|----------------|--------|----------------|---------|--------------|
| 1    | 10.063         | 331274 | 58.43          | 5401052 | 36.04        |
| 2    | 14.097         | 213537 | 37.66          | 5404869 | 36.06        |
| 3    | 70.370         | 15178  | 2.68           | 2072674 | 13.83        |
| 4    | 74.657         | 6976   | 1.23           | 2109026 | 14.07        |

|        |  |        |        |          |        |
|--------|--|--------|--------|----------|--------|
| Totals |  | 566965 | 100.00 | 14987621 | 100.00 |
|--------|--|--------|--------|----------|--------|

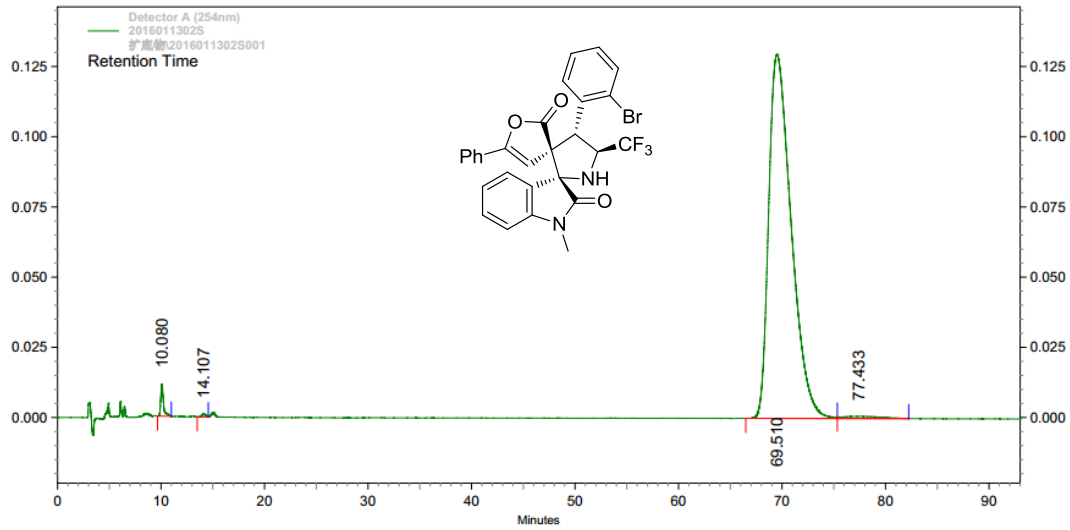

Detector  
A  
(254nm)

| Pk # | Retention Time | Height | Height Percent | Area     | Area Percent |
|------|----------------|--------|----------------|----------|--------------|
| 1    | 10.080         | 11349  | 7.95           | 208110   | 1.04         |
| 2    | 14.107         | 1091   | 0.76           | 26019    | 0.13         |
| 3    | 69.510         | 129594 | 90.77          | 19562602 | 97.88        |
| 4    | 77.433         | 735    | 0.51           | 190589   | 0.95         |

|        |  |        |        |          |        |
|--------|--|--------|--------|----------|--------|
| Totals |  | 142769 | 100.00 | 19987320 | 100.00 |
|--------|--|--------|--------|----------|--------|

# <sup>1</sup>H NMR, <sup>13</sup>C NMR and HPLC of 3u

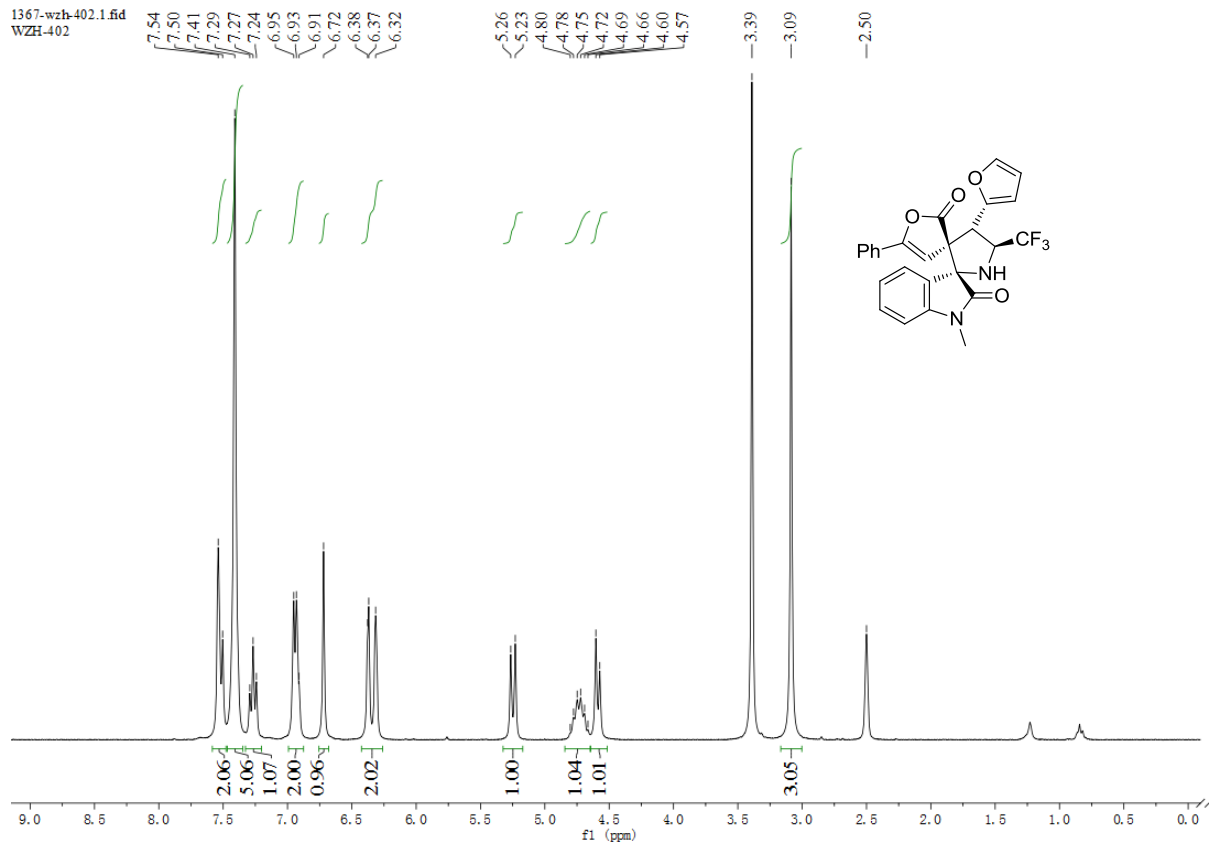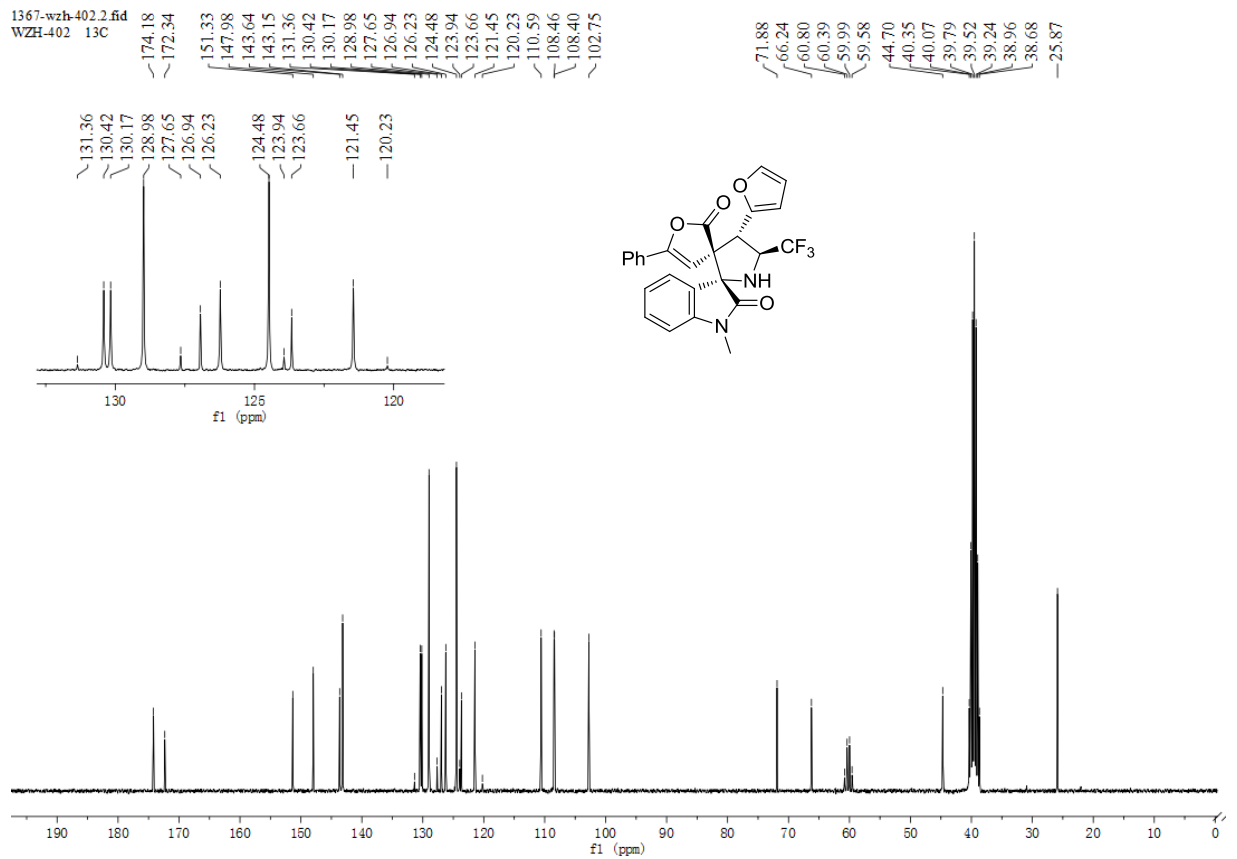

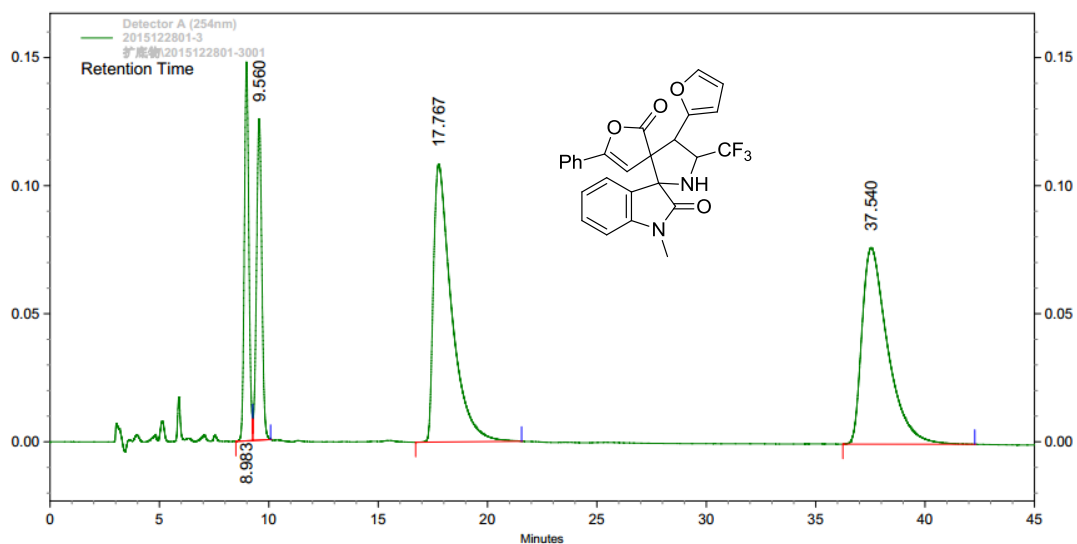

Detector  
A

(254nm)

| Pk # | Retention Time | Height | Height Percent | Area    | Area Percent |
|------|----------------|--------|----------------|---------|--------------|
| 1    | 8.983          | 147854 | 32.24          | 2109765 | 12.58        |
| 2    | 9.560          | 125491 | 27.36          | 2116534 | 12.62        |
| 3    | 17.767         | 108583 | 23.68          | 6267182 | 37.37        |
| 4    | 37.540         | 76709  | 16.73          | 6275385 | 37.42        |

| Totals | Area   | Height Percent | Area     | Area Percent |
|--------|--------|----------------|----------|--------------|
|        | 458637 | 100.00         | 16768866 | 100.00       |

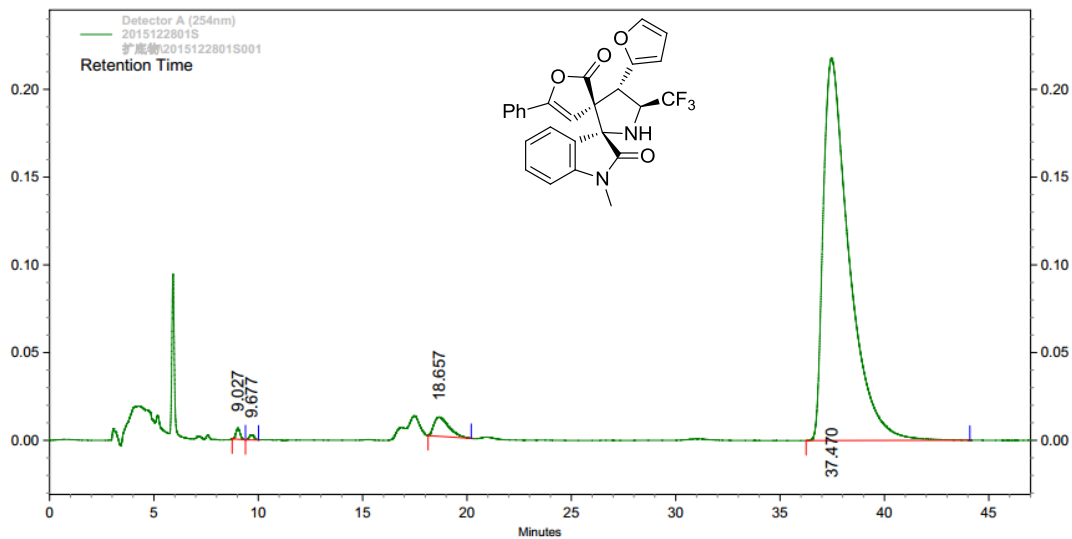

Detector  
A

(254nm)

| Pk # | Retention Time | Height | Height Percent | Area     | Area Percent |
|------|----------------|--------|----------------|----------|--------------|
| 1    | 9.027          | 6396   | 2.69           | 88261    | 0.46         |
| 2    | 9.677          | 2810   | 1.18           | 42842    | 0.22         |
| 3    | 18.657         | 10931  | 4.60           | 538531   | 2.78         |
| 4    | 37.470         | 217709 | 91.53          | 18694871 | 96.54        |

| Totals | Area   | Height Percent | Area     | Area Percent |
|--------|--------|----------------|----------|--------------|
|        | 237846 | 100.00         | 19364505 | 100.00       |

# <sup>1</sup>H NMR, <sup>13</sup>C NMR and HPLC of 3v

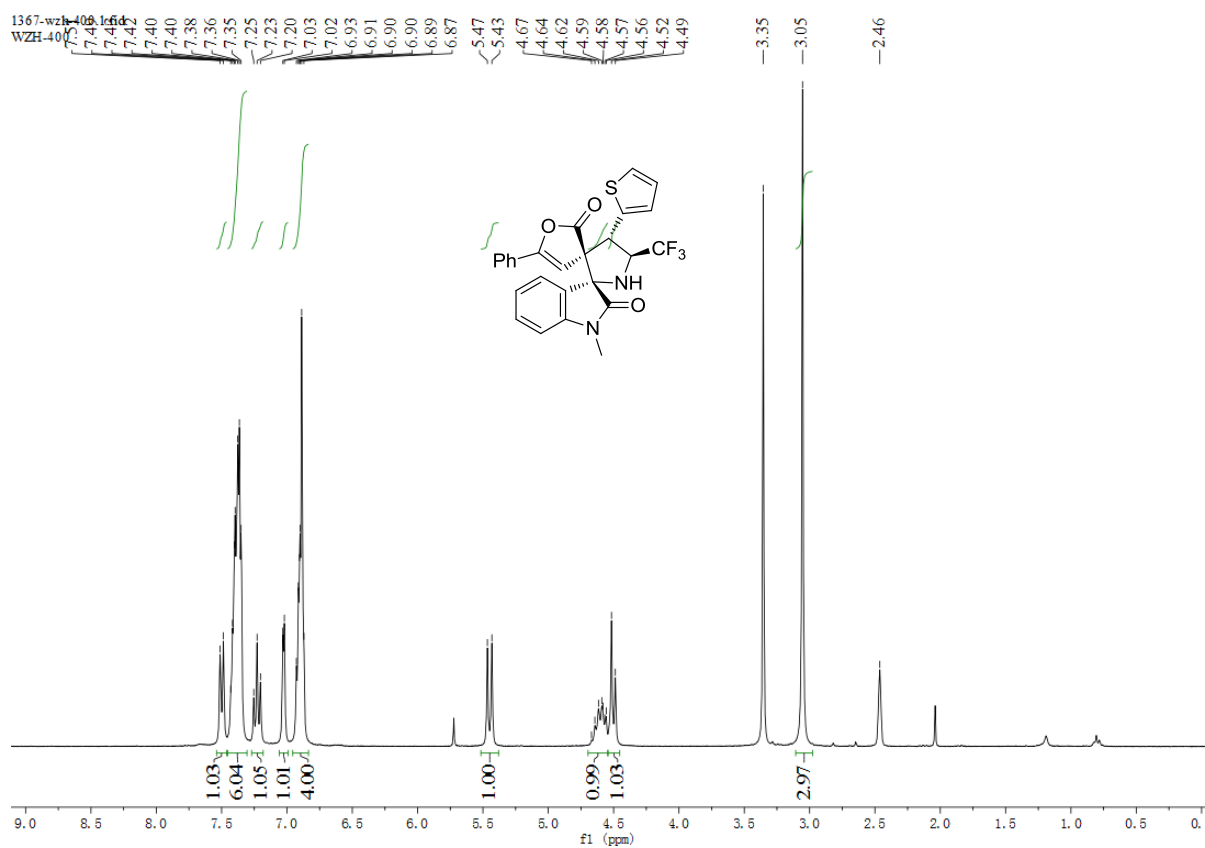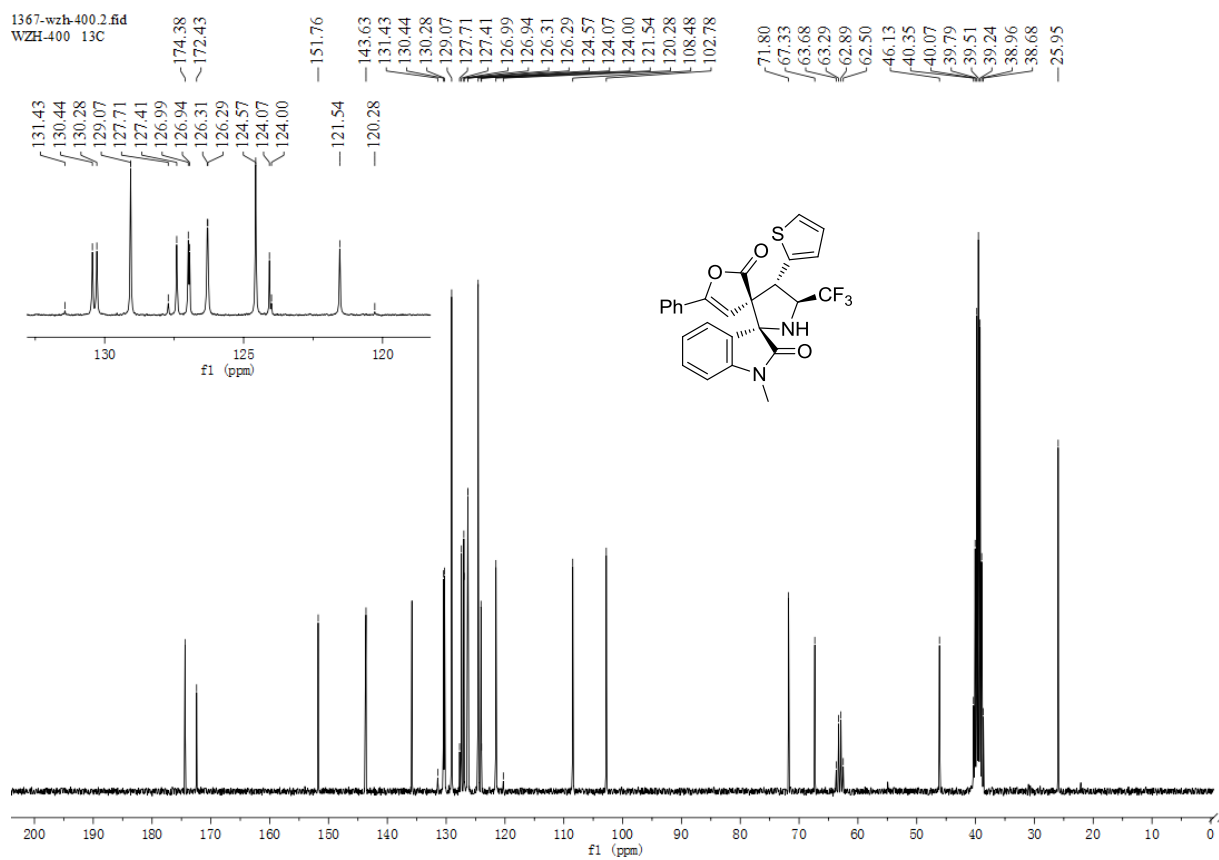

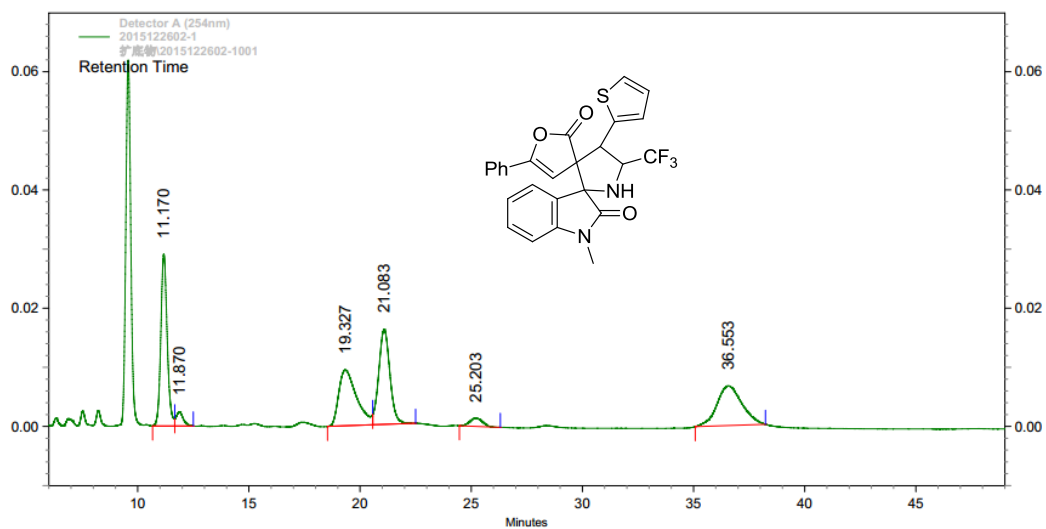

Detector  
A  
(254nm)

| PK # | Retention Time | Height | Height Percent | Area   | Area Percent |
|------|----------------|--------|----------------|--------|--------------|
| 1    | 11.170         | 29061  | 44.63          | 578280 | 25.18        |
| 2    | 11.870         | 2416   | 3.71           | 52623  | 2.29         |
| 3    | 19.327         | 9448   | 14.51          | 524794 | 22.85        |
| 4    | 21.083         | 16074  | 24.69          | 560179 | 24.39        |
| 5    | 25.203         | 1385   | 2.13           | 54861  | 2.39         |
| 6    | 36.553         | 6725   | 10.33          | 525777 | 22.89        |

|        |  |       |        |         |        |
|--------|--|-------|--------|---------|--------|
| Totals |  | 65109 | 100.00 | 2296514 | 100.00 |
|--------|--|-------|--------|---------|--------|

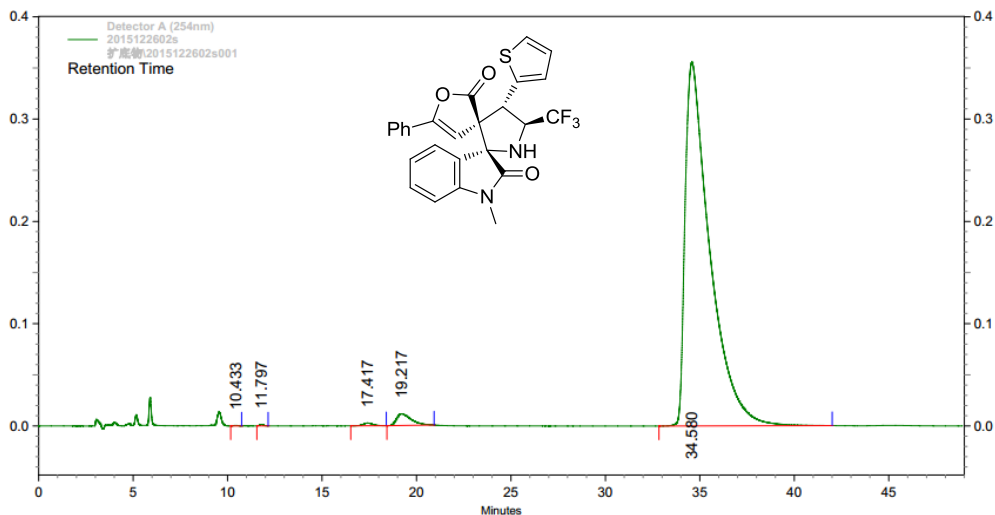

Detector  
A  
(254nm)

| PK # | Retention Time | Height | Height Percent | Area     | Area Percent |
|------|----------------|--------|----------------|----------|--------------|
| 1    | 10.433         | 505    | 0.14           | 8336     | 0.03         |
| 2    | 11.797         | 1386   | 0.37           | 20594    | 0.06         |
| 3    | 17.417         | 2712   | 0.73           | 97561    | 0.30         |
| 4    | 19.217         | 11436  | 3.08           | 623096   | 1.89         |
| 5    | 34.580         | 355518 | 95.68          | 32265447 | 97.73        |

|        |  |        |        |          |        |
|--------|--|--------|--------|----------|--------|
| Totals |  | 371557 | 100.00 | 33015034 | 100.00 |
|--------|--|--------|--------|----------|--------|

# <sup>1</sup>H NMR, <sup>13</sup>C NMR and HPLC of 3w

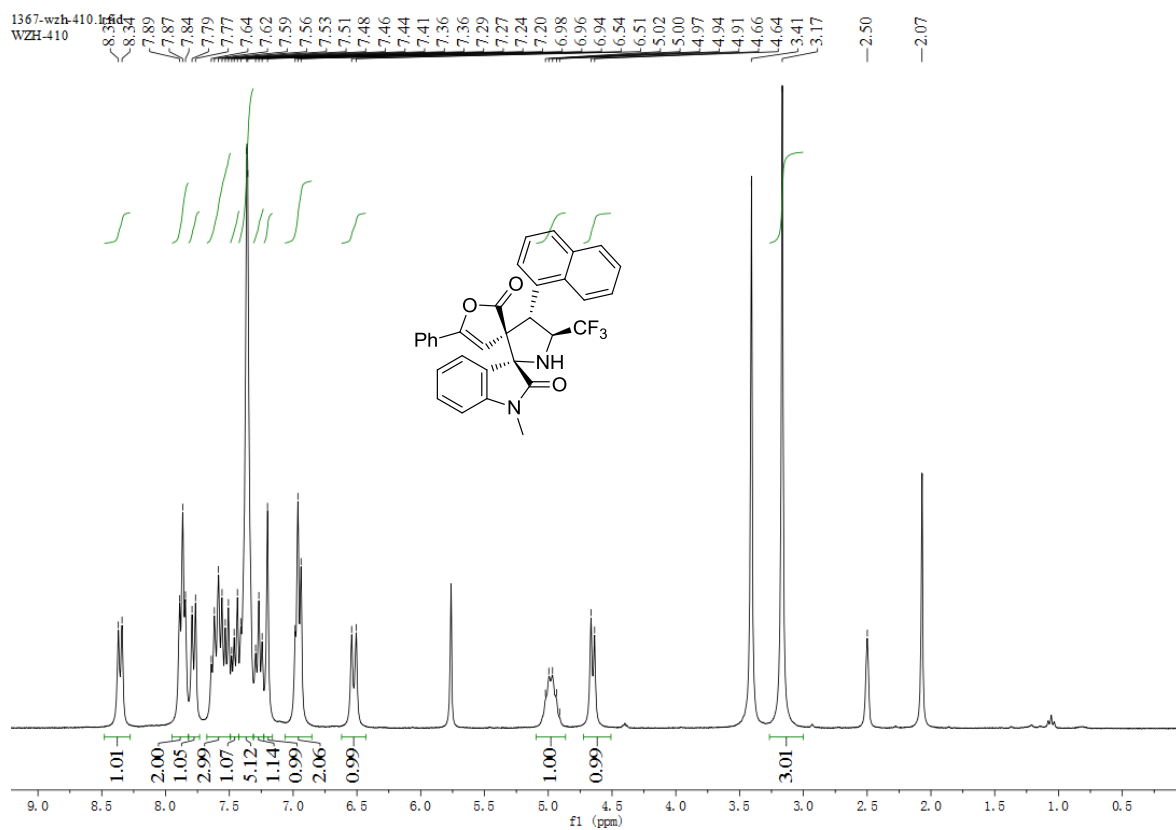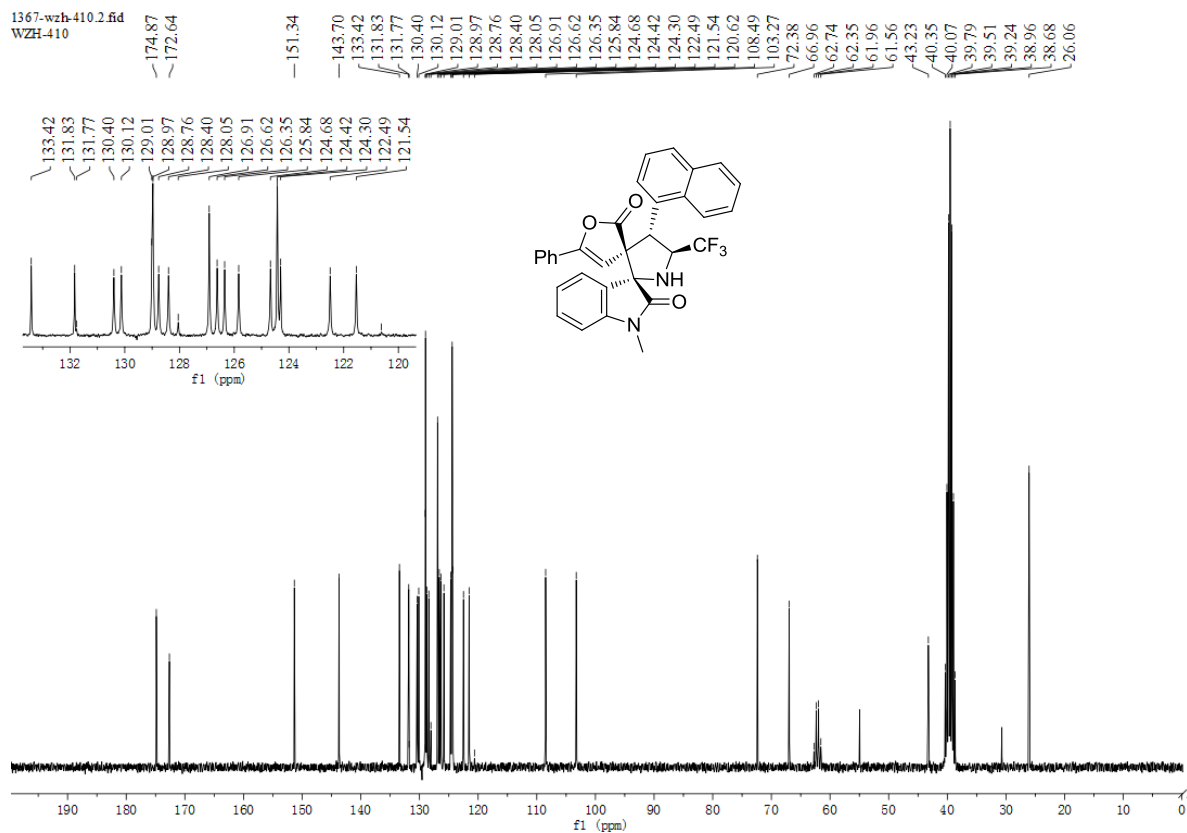



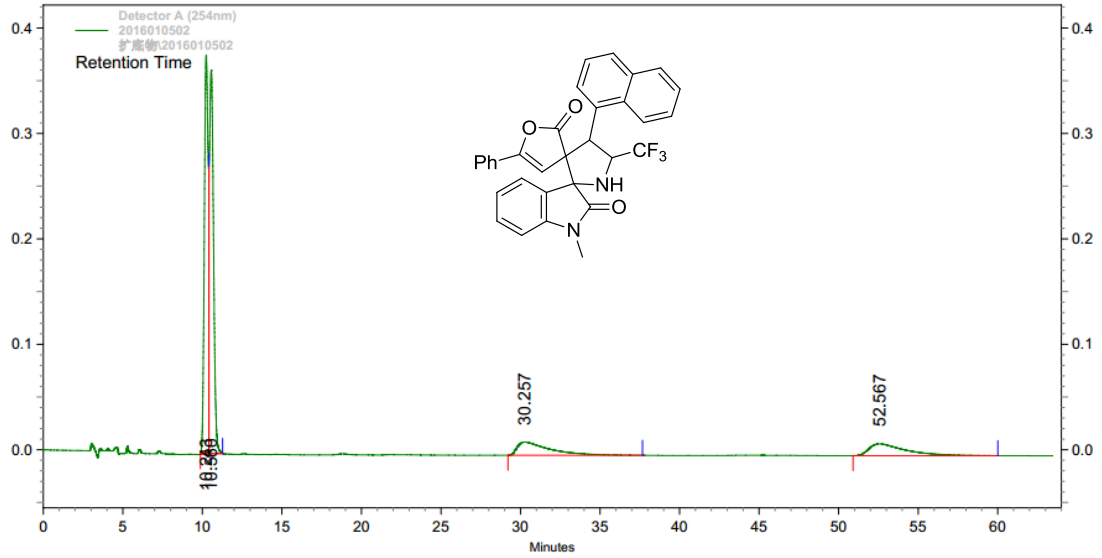

Detector  
A  
(254nm)

| Pk # | Retention Time | Height | Height Percent | Area    | Area Percent |
|------|----------------|--------|----------------|---------|--------------|
| 1    | 10.243         | 377903 | 49.40          | 6373869 | 38.61        |
| 2    | 10.560         | 363369 | 47.50          | 6553730 | 39.70        |
| 3    | 30.257         | 12550  | 1.64           | 1788987 | 10.84        |
| 4    | 52.567         | 11191  | 1.46           | 1793084 | 10.86        |

|        |  |        |        |          |        |
|--------|--|--------|--------|----------|--------|
| Totals |  | 765013 | 100.00 | 16509670 | 100.00 |
|--------|--|--------|--------|----------|--------|

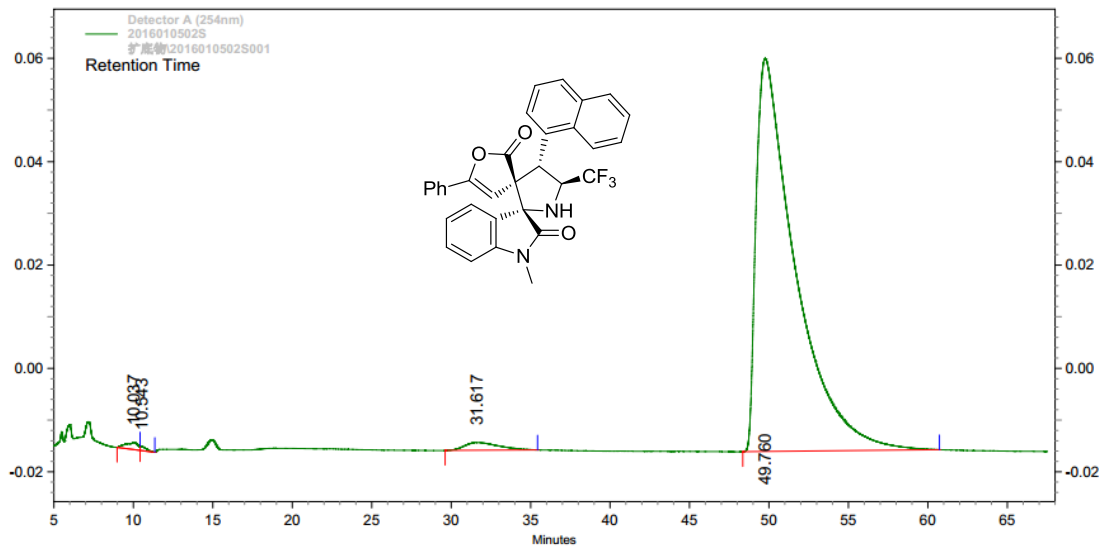

Detector  
A  
(254nm)

| Pk # | Retention Time | Height | Height Percent | Area     | Area Percent |
|------|----------------|--------|----------------|----------|--------------|
| 1    | 10.037         | 1386   | 1.74           | 71764    | 0.54         |
| 2    | 10.543         | 778    | 0.98           | 21340    | 0.16         |
| 3    | 31.617         | 1496   | 1.88           | 223545   | 1.68         |
| 4    | 49.760         | 76071  | 95.41          | 12981225 | 97.62        |

|        |  |       |        |          |        |
|--------|--|-------|--------|----------|--------|
| Totals |  | 79731 | 100.00 | 13297874 | 100.00 |
|--------|--|-------|--------|----------|--------|

# <sup>1</sup>H NMR, <sup>13</sup>C NMR and HPLC of 3x

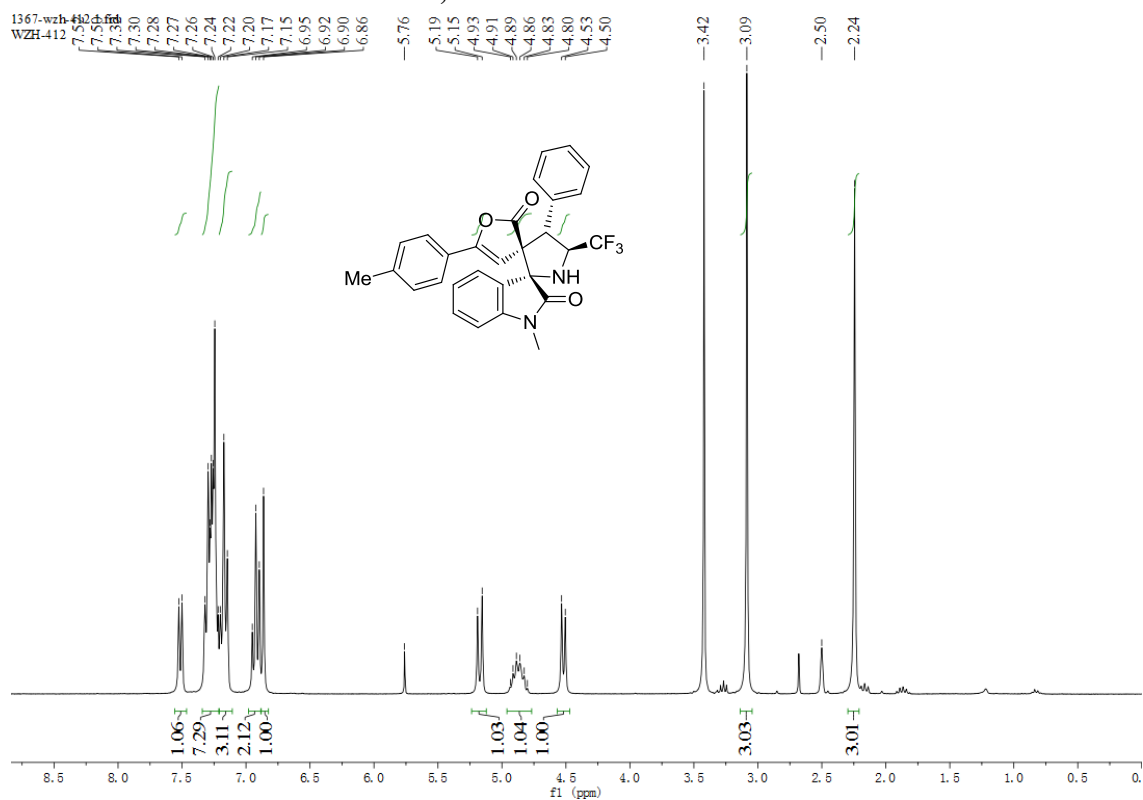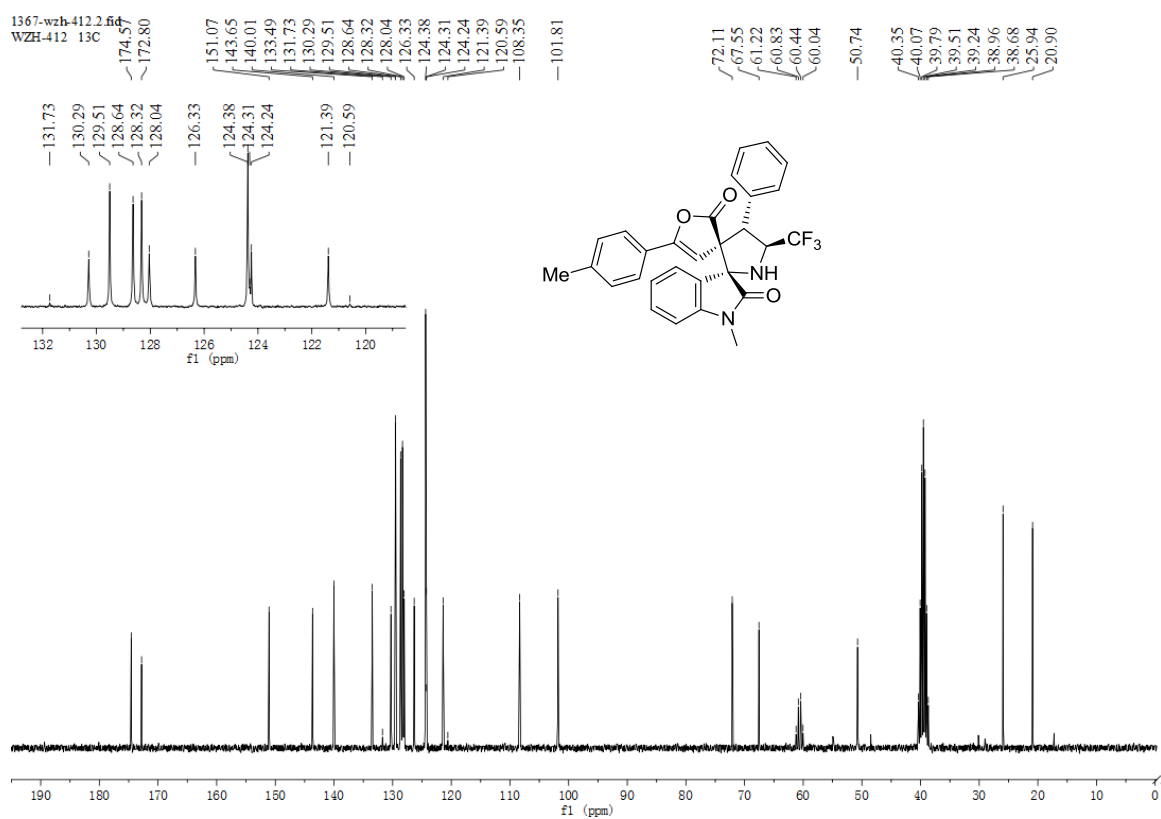

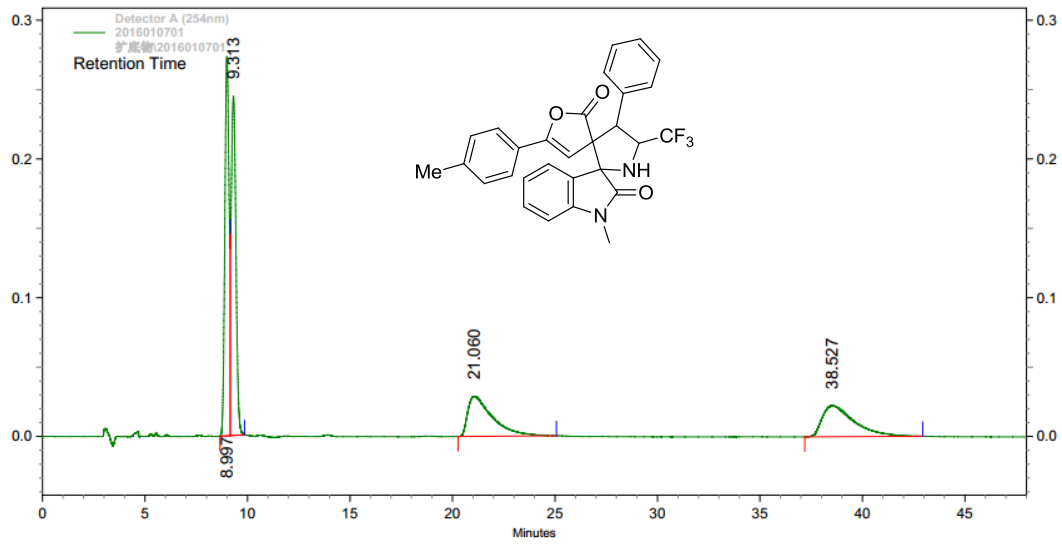

Detector  
A  
(254nm)

| Pk # | Retention Time | Height | Height Percent | Area    | Area Percent |
|------|----------------|--------|----------------|---------|--------------|
| 1    | 8.997          | 273171 | 48.00          | 3923065 | 30.95        |
| 2    | 9.313          | 244524 | 42.97          | 3944205 | 31.11        |
| 3    | 21.060         | 28888  | 5.08           | 2391013 | 18.86        |
| 4    | 38.527         | 22489  | 3.95           | 2418178 | 19.08        |

| Totals |  | 569072 | 100.00 | 12676461 | 100.00 |
|--------|--|--------|--------|----------|--------|
|--------|--|--------|--------|----------|--------|

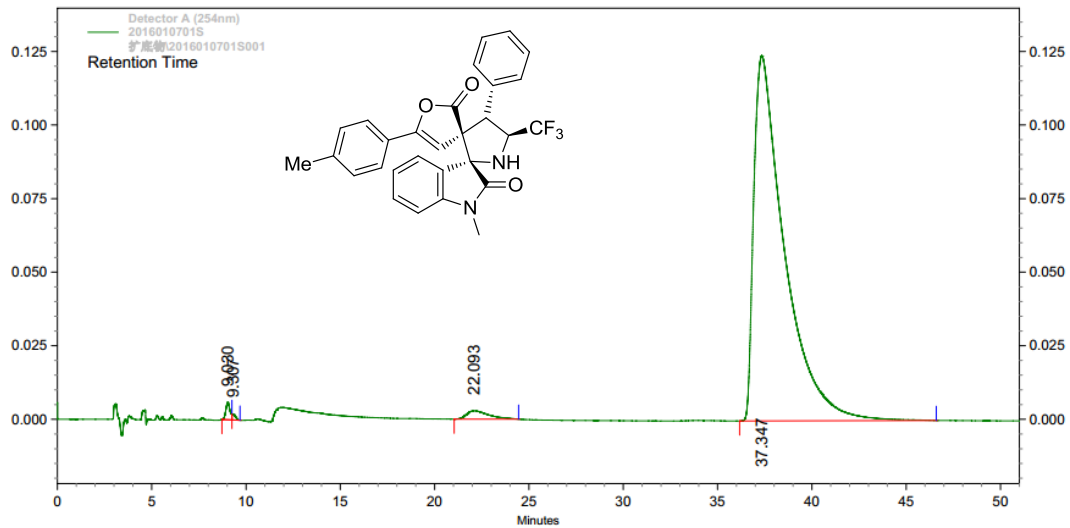

Detector  
A  
(254nm)

| Pk # | Retention Time | Height | Height Percent | Area     | Area Percent |
|------|----------------|--------|----------------|----------|--------------|
| 1    | 9.030          | 5861   | 4.35           | 89164    | 0.62         |
| 2    | 9.307          | 1920   | 1.43           | 24129    | 0.17         |
| 3    | 22.093         | 2820   | 2.09           | 232069   | 1.62         |
| 4    | 37.347         | 124108 | 92.13          | 13998595 | 97.59        |

| Totals |  | 134709 | 100.00 | 14343957 | 100.00 |
|--------|--|--------|--------|----------|--------|
|--------|--|--------|--------|----------|--------|

# <sup>1</sup>H NMR, <sup>13</sup>C NMR and HPLC of 3y

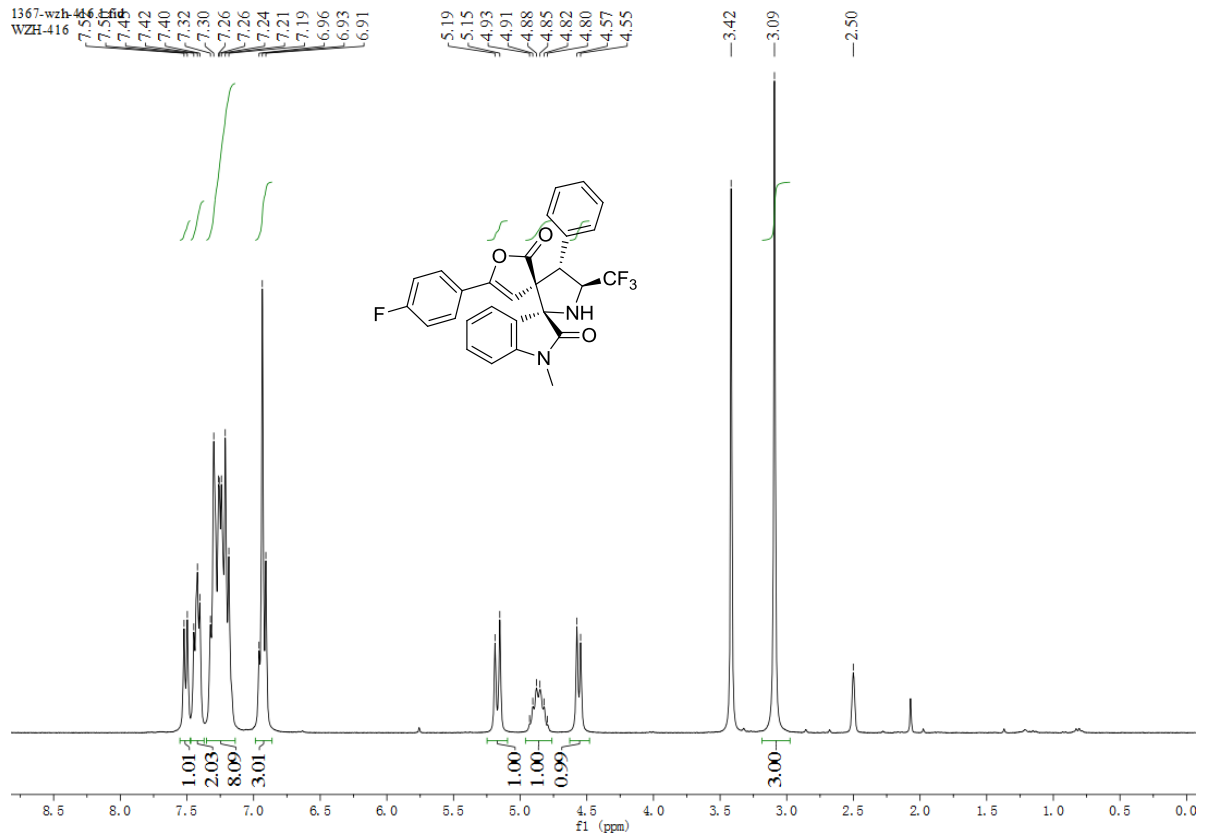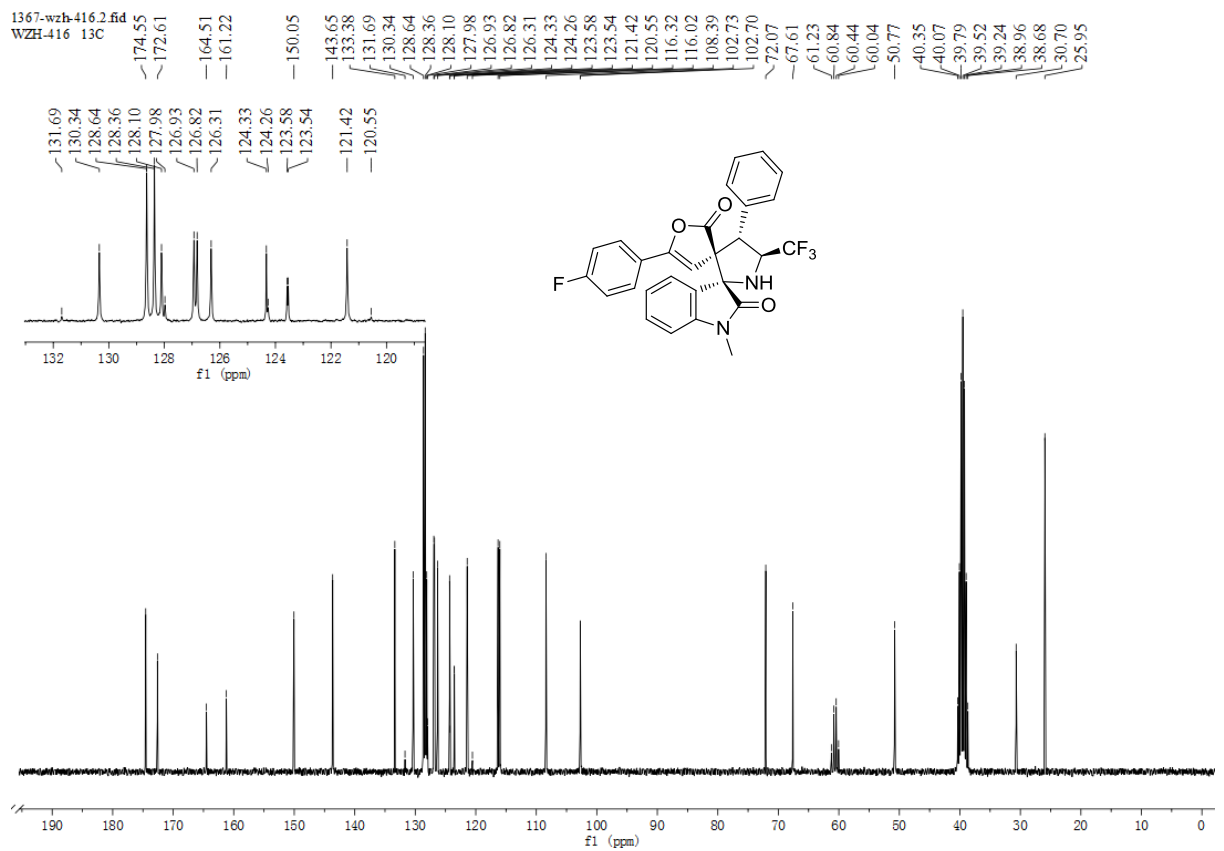

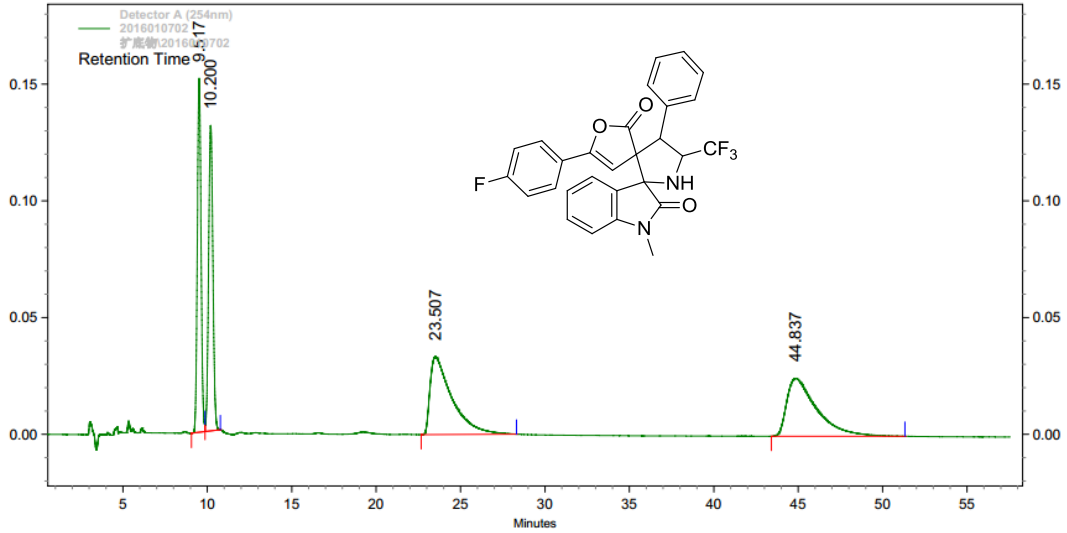

Detector  
A

(254nm)

| PK # | Retention Time | Height | Height Percent | Area    | Area Percent |
|------|----------------|--------|----------------|---------|--------------|
| 1    | 9.517          | 151572 | 44.51          | 2305924 | 21.66        |
| 2    | 10.200         | 130788 | 38.40          | 2307428 | 21.68        |
| 3    | 23.507         | 33374  | 9.80           | 2998887 | 28.17        |
| 4    | 44.837         | 24833  | 7.29           | 3032845 | 28.49        |

| Totals |  | 340567 | 100.00 | 10645084 | 100.00 |
|--------|--|--------|--------|----------|--------|
|--------|--|--------|--------|----------|--------|

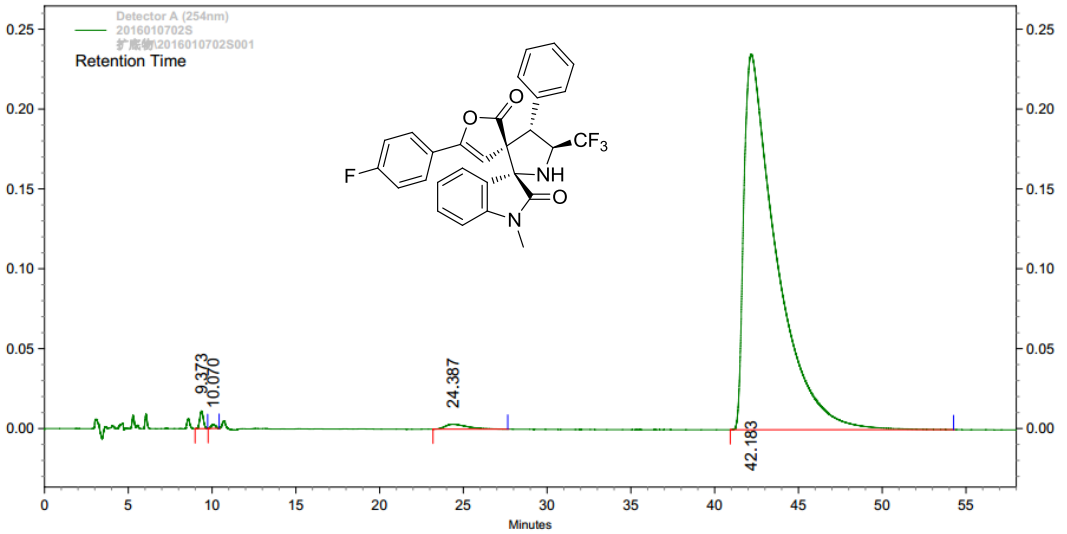

Detector  
A

(254nm)

| PK # | Retention Time | Height | Height Percent | Area     | Area Percent |
|------|----------------|--------|----------------|----------|--------------|
| 1    | 9.373          | 11032  | 4.38           | 164929   | 0.52         |
| 2    | 10.070         | 2662   | 1.06           | 45271    | 0.14         |
| 3    | 24.387         | 3017   | 1.20           | 284660   | 0.89         |
| 4    | 42.183         | 235203 | 93.37          | 31470280 | 98.45        |

| Totals |  | 251914 | 100.00 | 31965140 | 100.00 |
|--------|--|--------|--------|----------|--------|
|--------|--|--------|--------|----------|--------|

# <sup>1</sup>H NMR, <sup>13</sup>C NMR and HPLC of 3z

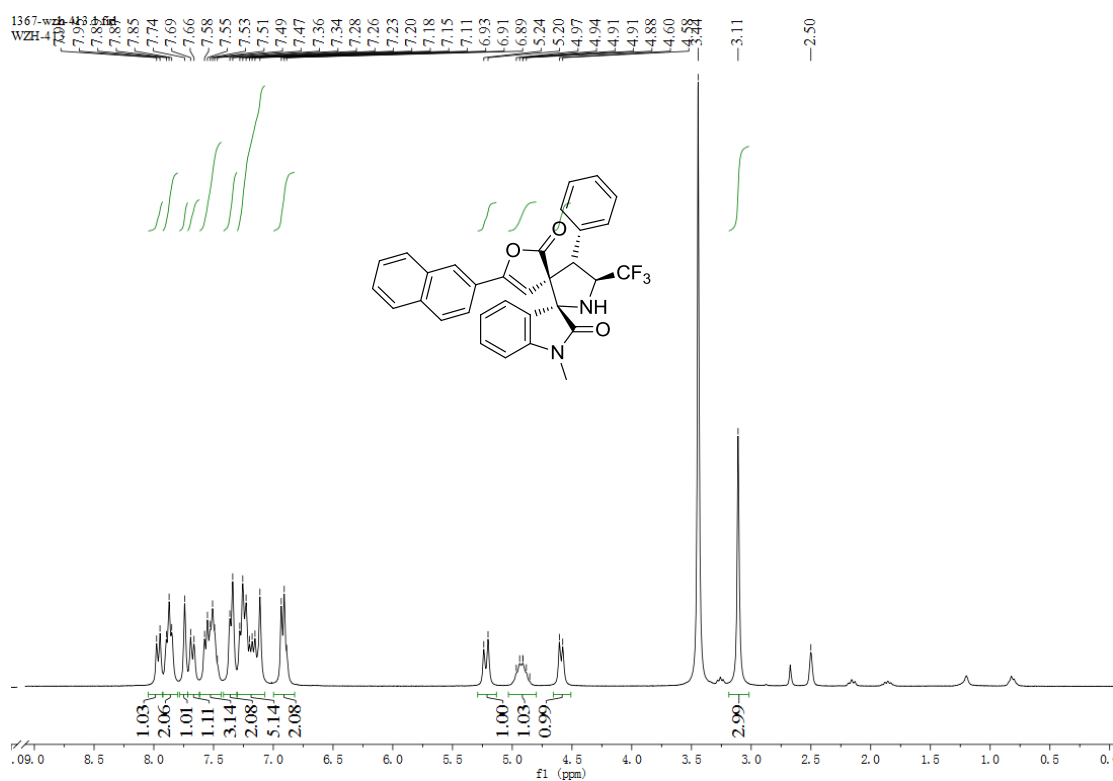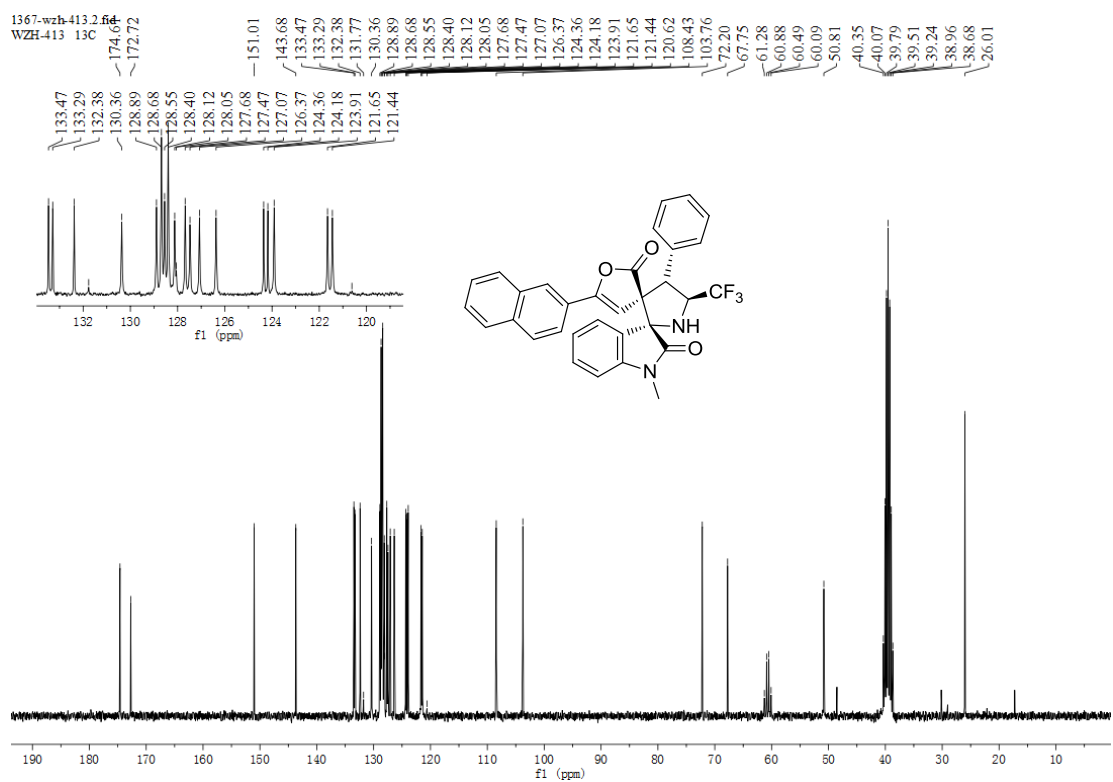

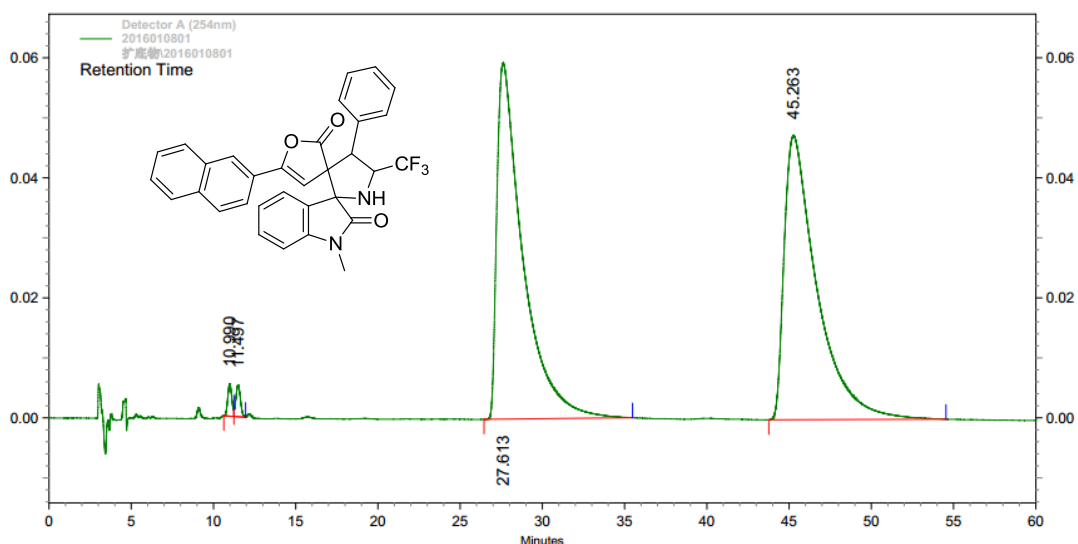

Detector  
A

(254nm)

| Pk # | Retention Time | Height | Height Percent | Area    | Area Percent |
|------|----------------|--------|----------------|---------|--------------|
| 1    | 10.990         | 5378   | 4.58           | 91970   | 0.70         |
| 2    | 11.497         | 5247   | 4.47           | 101038  | 0.76         |
| 3    | 27.613         | 59358  | 50.59          | 6483797 | 49.07        |
| 4    | 45.263         | 47343  | 40.35          | 6536789 | 49.47        |

| Totals |  |        |        |          |
|--------|--|--------|--------|----------|
|        |  | 117326 | 100.00 | 13213594 |
|        |  |        |        | 100.00   |

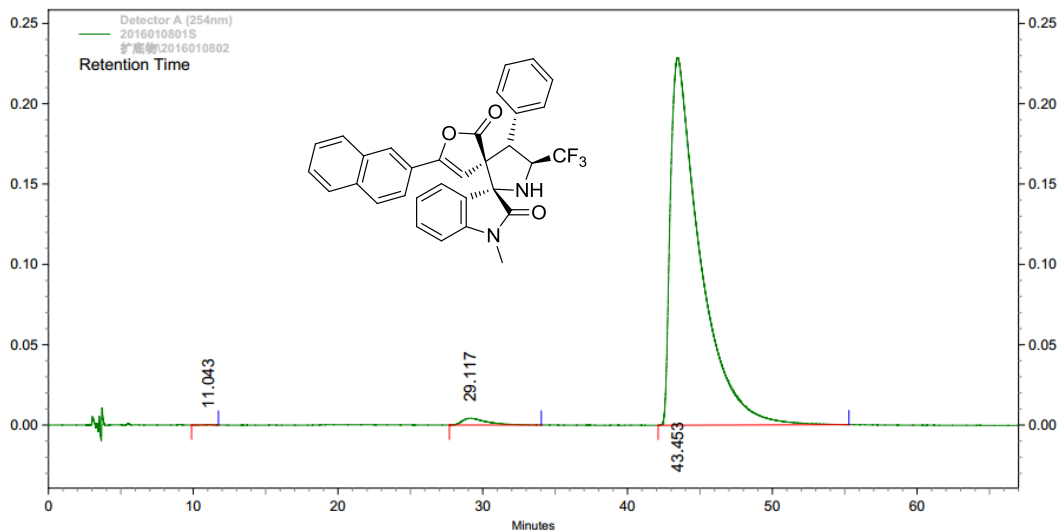

Detector

A

(254nm)

| Pk # | Retention Time | Height | Height Percent | Area     | Area Percent |
|------|----------------|--------|----------------|----------|--------------|
| 1    | 11.043         | 319    | 0.14           | 11376    | 0.03         |
| 2    | 29.117         | 4225   | 1.81           | 499828   | 1.52         |
| 3    | 43.453         | 228747 | 98.05          | 32445098 | 98.45        |

| Totals |  |        |        |          |
|--------|--|--------|--------|----------|
|        |  | 233291 | 100.00 | 32956302 |
|        |  |        |        | 100.00   |

# <sup>1</sup>H NMR, <sup>13</sup>C NMR and HPLC of 6

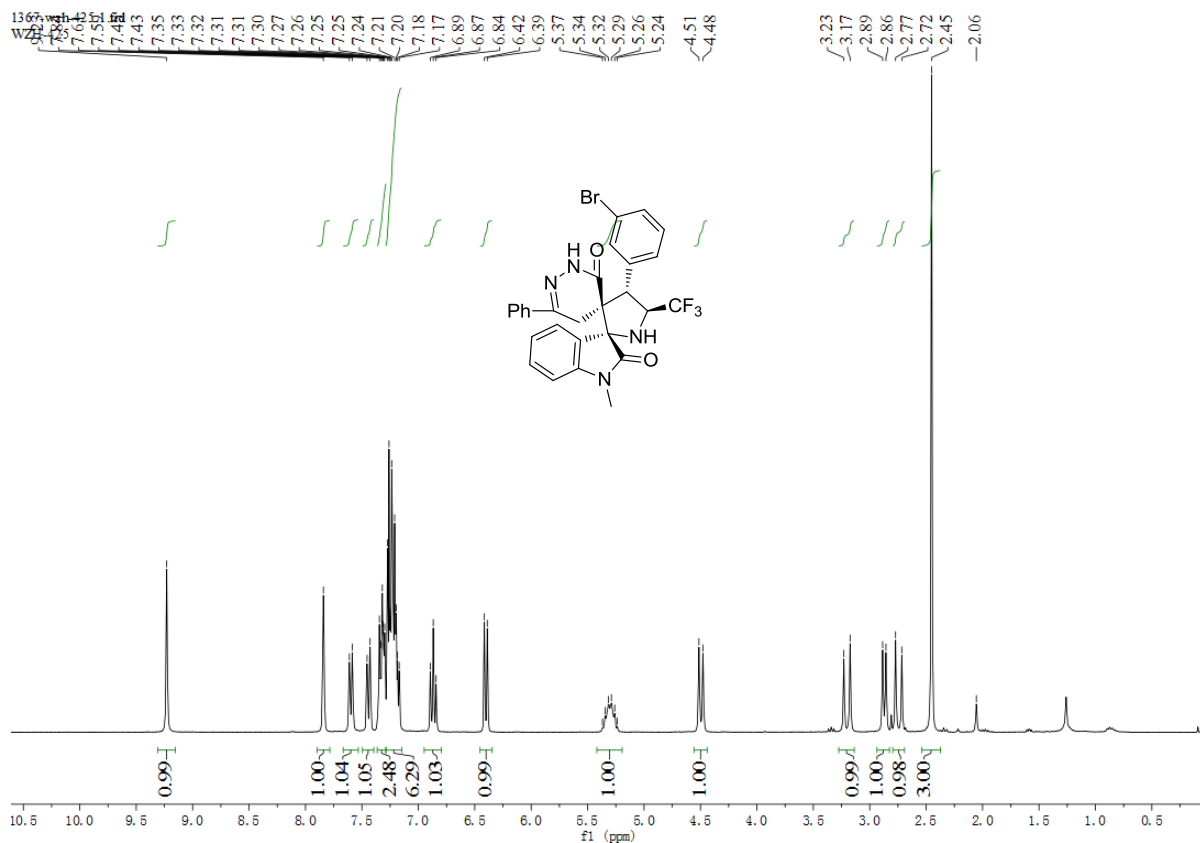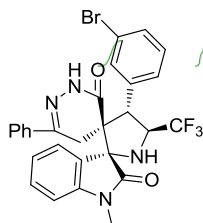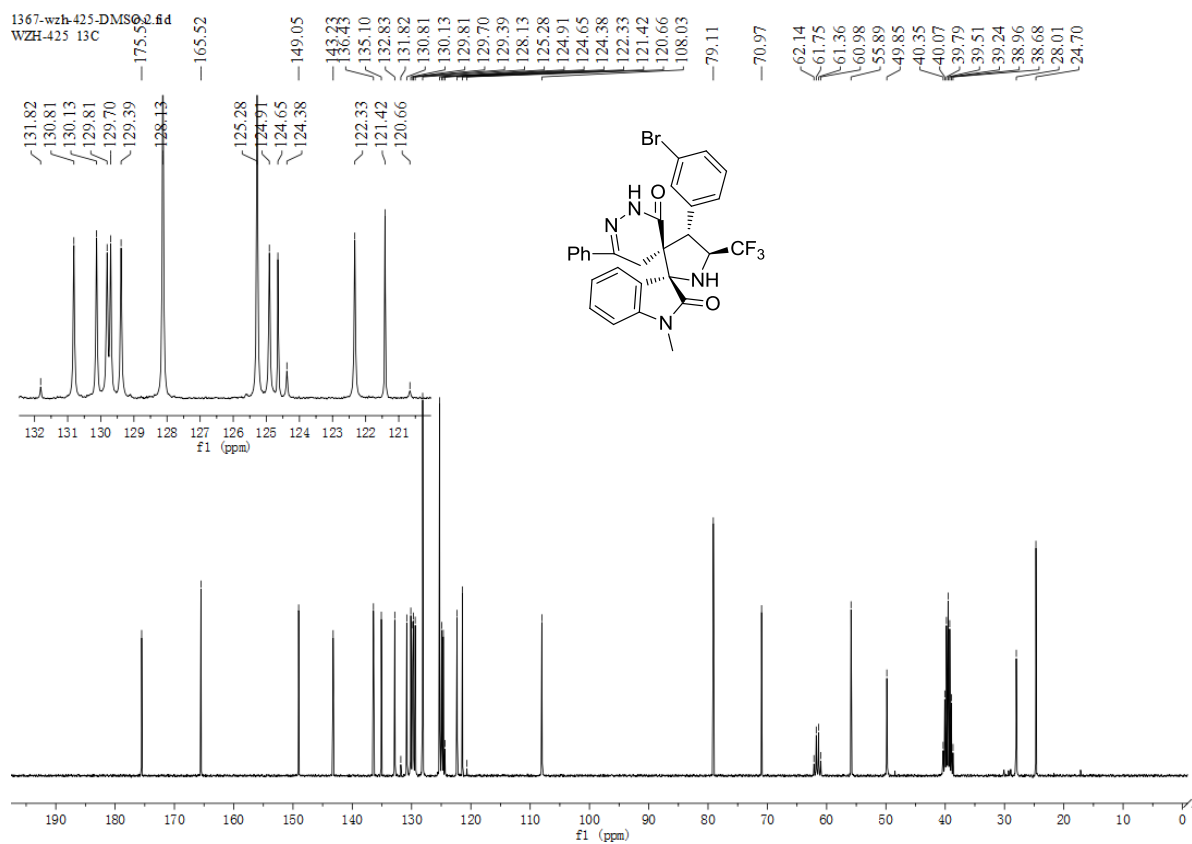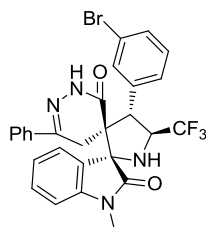



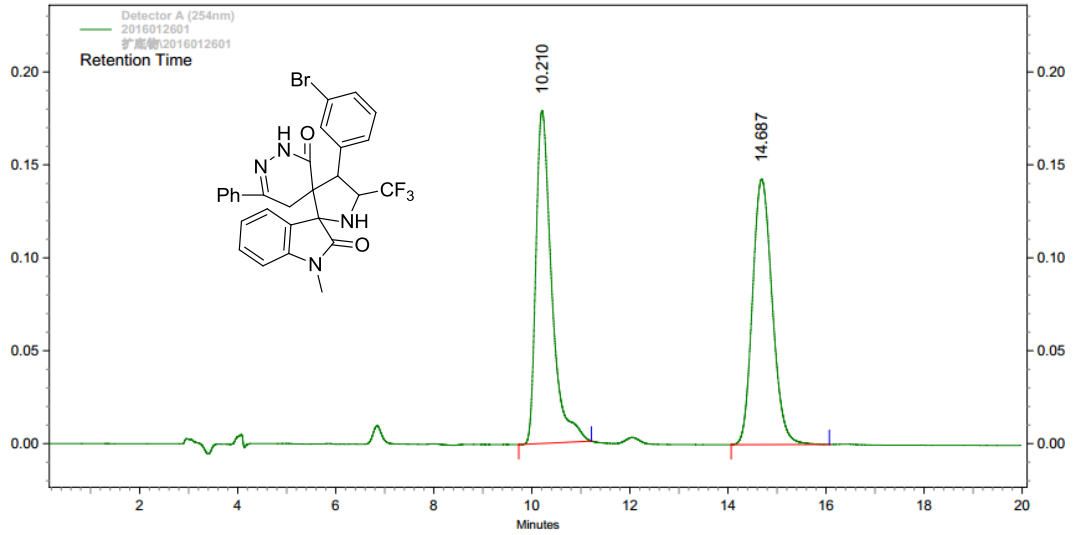

Detector  
A  
(254nm)

| Pk # | Retention Time | Height | Height Percent | Area    | Area Percent |
|------|----------------|--------|----------------|---------|--------------|
| 1    | 10.210         | 179240 | 55.65          | 3994980 | 50.06        |
| 2    | 14.687         | 142824 | 44.35          | 3985438 | 49.94        |

| Totals |  | 322064 | 100.00 | 7980418 | 100.00 |
|--------|--|--------|--------|---------|--------|
|--------|--|--------|--------|---------|--------|

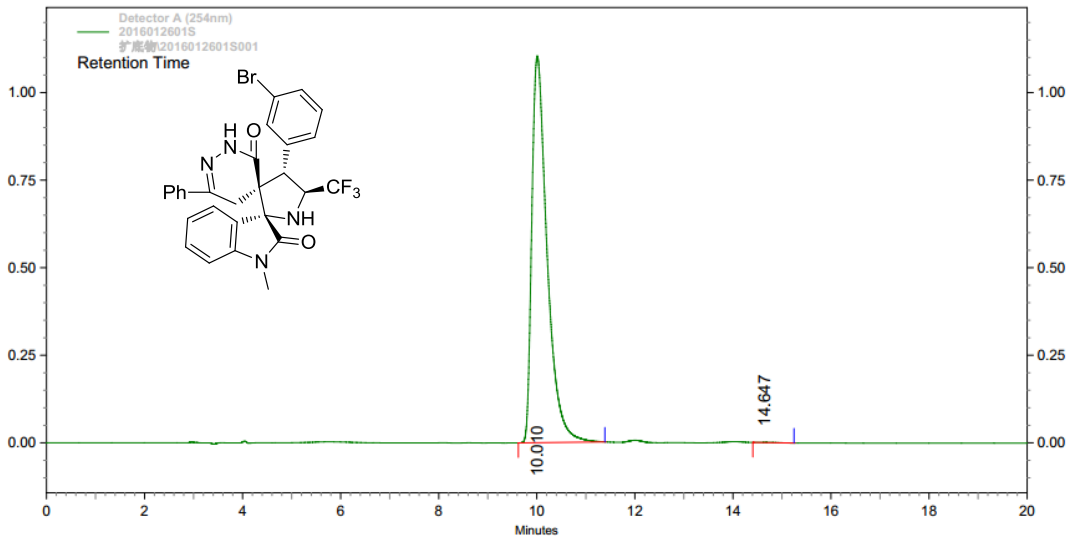

Detector  
A  
(254nm)

| Pk # | Retention Time | Height  | Height Percent | Area     | Area Percent |
|------|----------------|---------|----------------|----------|--------------|
| 1    | 10.010         | 1103906 | 99.92          | 23906747 | 99.93        |
| 2    | 14.647         | 843     | 0.08           | 15976    | 0.07         |

| Totals |  | 1104749 | 100.00 | 23922723 | 100.00 |
|--------|--|---------|--------|----------|--------|
|--------|--|---------|--------|----------|--------|

# <sup>1</sup>H NMR, <sup>13</sup>C NMR and HPLC of 4

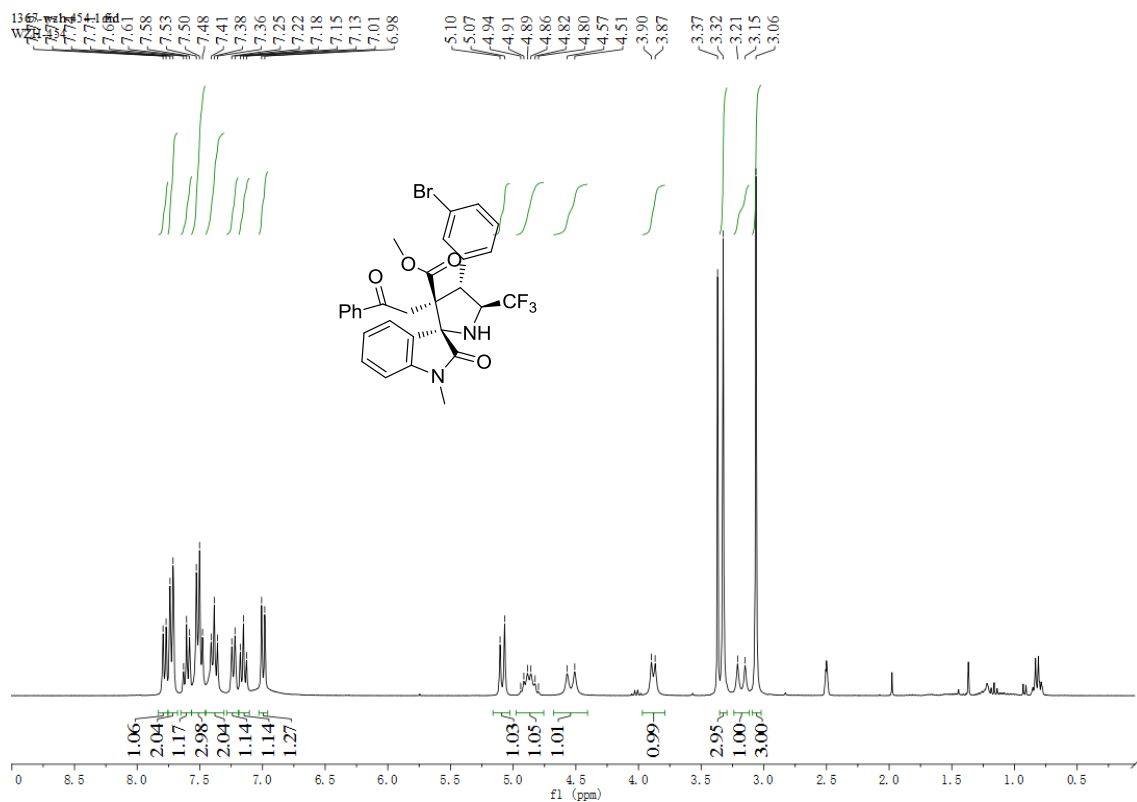

1367-wzh-454.2.fid  
 WZH-454 13C

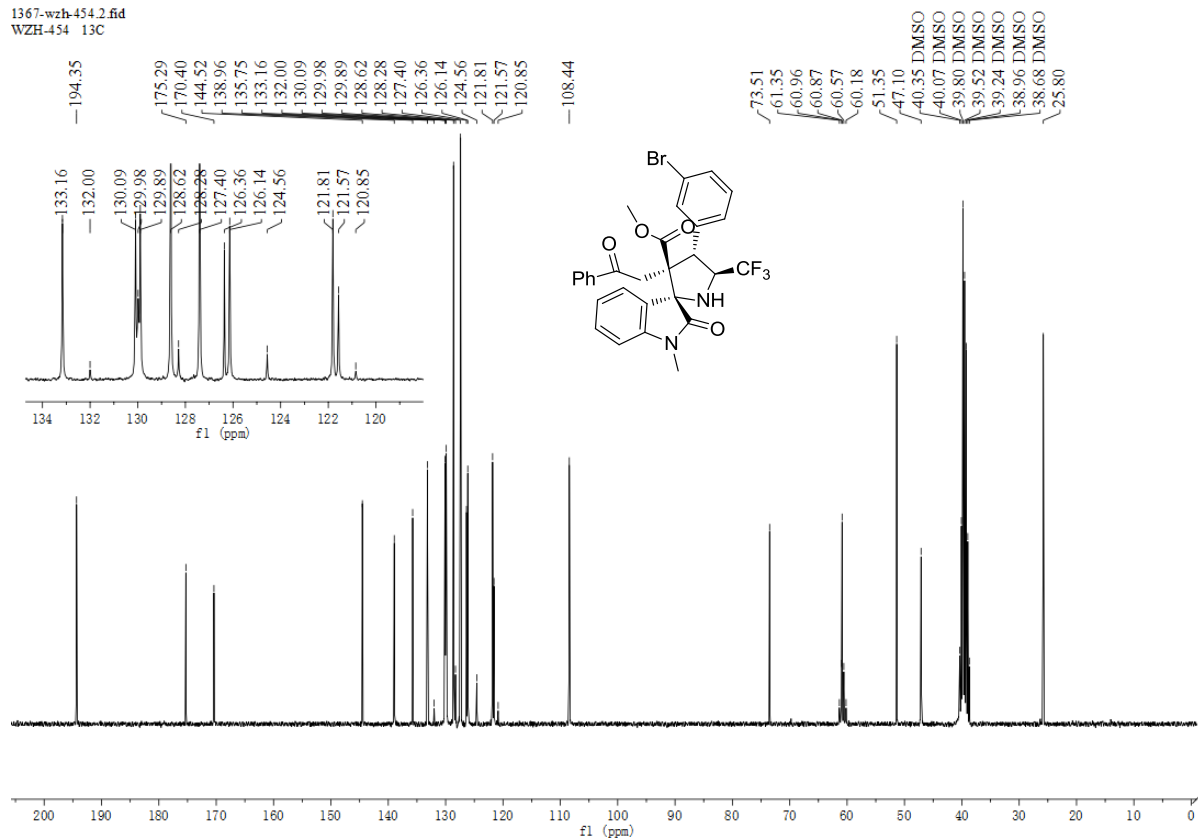

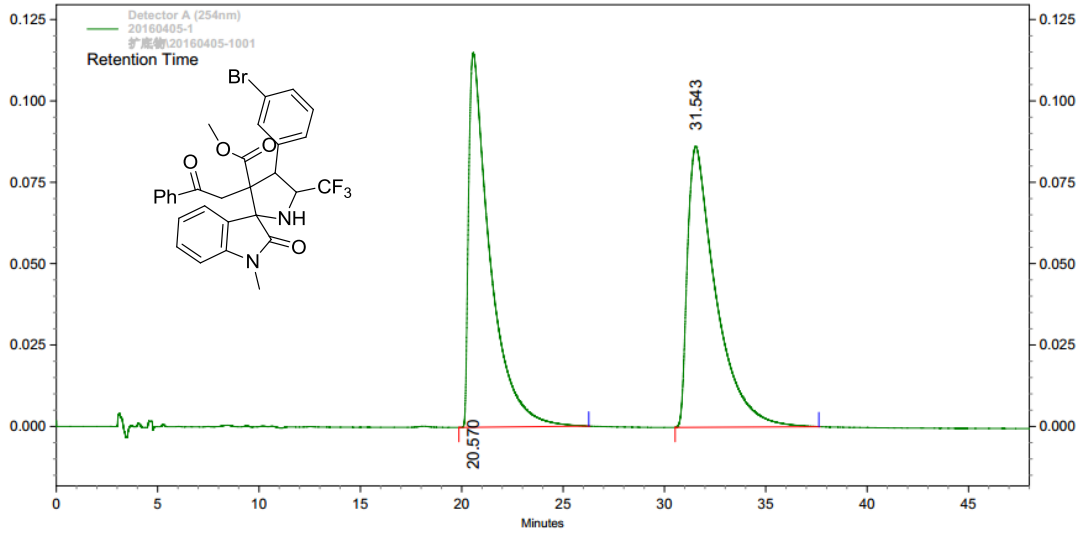

Detector A  
(254nm)

| Pk # | Retention Time | Height | Height Percent | Area    | Area Percent |
|------|----------------|--------|----------------|---------|--------------|
| 1    | 20.570         | 115048 | 57.14          | 8404657 | 50.01        |
| 2    | 31.543         | 86289  | 42.86          | 8402144 | 49.99        |

| Totals |  | 201337 | 100.00 | 16806801 | 100.00 |
|--------|--|--------|--------|----------|--------|
|--------|--|--------|--------|----------|--------|

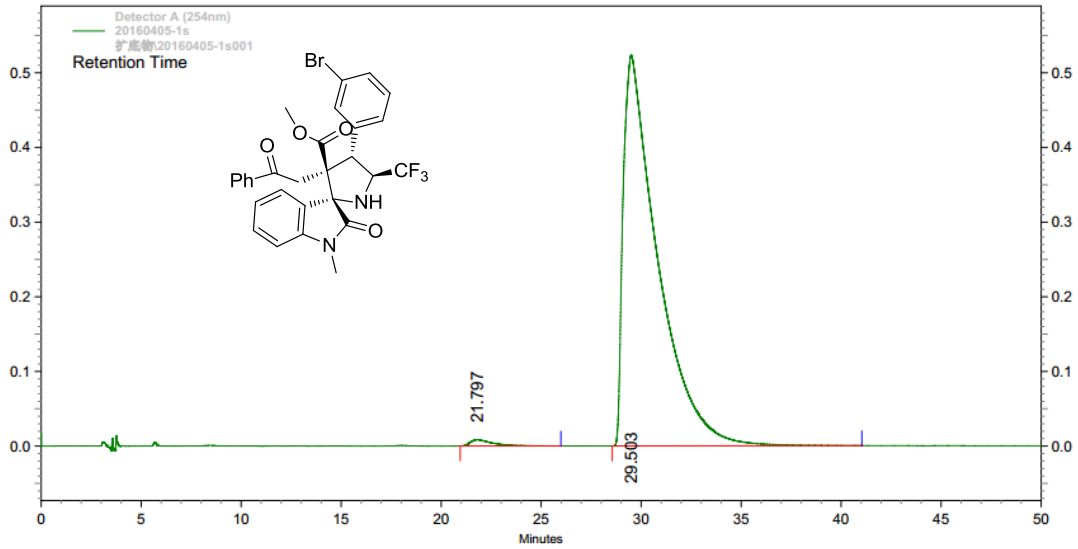

Detector A  
(254nm)

| Pk # | Retention Time | Height | Height Percent | Area     | Area Percent |
|------|----------------|--------|----------------|----------|--------------|
| 1    | 21.797         | 8223   | 1.55           | 659597   | 1.04         |
| 2    | 29.503         | 523060 | 98.45          | 62507373 | 98.96        |

| Totals |  | 531283 | 100.00 | 63166970 | 100.00 |
|--------|--|--------|--------|----------|--------|
|--------|--|--------|--------|----------|--------|
